# Supplementary material for: [Semiquantitative method of hydrogen cyanide determination in bitter and sweet almonds].
Source: publisher site journal article supplement (doi:10.3762/bjoc.19.49), 1973-01-01
Supplement: Additional file 1 [file 1860-5397-19-49-S1.pdf]

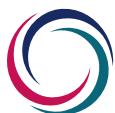

## Supporting Information

for

### **Synthesis, structure, and properties of switchable cross-conjugated 1,4-diaryl-1,3-butadiynes based on 1,8-bis(dimethylamino)naphthalene**

Semyon V. Tsybulin, Ekaterina A. Filatova, Alexander F. Pozharskii,  
Valery A. Ozeryanskii and Anna V. Gulevskaya

*Beilstein J. Org. Chem.* **2023**, *19*, 674–686. doi:10.3762/bjoc.19.49

## Experimental section

## Table of contents

|                                                                               |     |
|-------------------------------------------------------------------------------|-----|
| General information .....                                                     | S2  |
| Experimental procedures and characterization data .....                       | S2  |
| Copies of $^1\text{H}$ and $^{13}\text{C}$ NMR spectra (Figures S1–S59) ..... | S11 |
| X-ray data (Figures S60–S69) .....                                            | S41 |
| References .....                                                              | S45 |

## General information

$^1\text{H}$  and  $^{13}\text{C}$  NMR spectra were recorded on 250 and 600 MHz spectrometers. Chemical shifts were reported in ppm relative to  $\text{Me}_4\text{Si}$ . The UV/Vis spectra of oligomers were recorded on a Varian Cary 50 Probe spectrophotometer in  $\text{CHCl}_3$  and  $\text{CH}_3\text{CN}$ . The HR-ESI mass-spectra were obtained on a BRUKER maXis spectrometer equipped with an electrospray ionization (ESI) source. Melting points were determined on a Stuart SMP30 instrument in glass capillaries and are uncorrected. Flash column chromatography was performed on  $\text{Al}_2\text{O}_3$ . Commercial aryl- and (trimethylsilyl)acetylenes, amines,  $\text{Pd}(\text{PPh}_3)_2\text{Cl}_2$ ,  $\text{Pd}_2\text{dba}_3$ , anhydrous DMSO were used as received. 2,7-Diiodo-1,8-bis(dimethylamino)naphthalene (**8**) was synthesized as it was described earlier.<sup>[1]</sup> Copper(I) acetylides were prepared from the corresponding alkynes according to the published procedure.<sup>[2]</sup>

## Experimental procedures and characterization data

### 2-Iodo- $N^1,N^1,N^8,N^8$ -tetramethyl-7-(phenylethynyl)naphthalene-1,8-diamine (**7a**) and $N^1,N^1,N^8,N^8$ -tetramethyl-2,7-bis(phenylethynyl)-naphthalene-1,8-diamine (**9a**)

*Method A.* To a solution of 2,7-diiodo-1,8-bis(dimethylamino)naphthalene (**8**, 513 mg, 1.1 mmol) in dry pyridine (5 mL) dry copper(I) phenylacetylide (82 mg, 0.5 mmol) was added under argon. The reaction mixture was stirred at 80 °C for 20 h. The solvent was evaporated to dryness. The residue was purified by flash column chromatography on  $\text{Al}_2\text{O}_3$  ( $2 \times 20$  cm) with *n*-hexane as the eluent. The first yellow fraction with  $R_f = 0.3$ – $0.4$  gave 114 mg (52%) of compound **7a**. The second yellow fraction with  $R_f = 0.1$  gave 19 mg (18%) of compound **9a**.

*Method B.* A mixture of 2,7-diiodo-1,8-bis(dimethylamino)naphthalene (**8**, 513 mg, 1.1 mmol), CuI (9.5 mg, 0.05 mmol),  $\text{Pd}_2\text{dba}_3$  (18 mg, 0.02 mmol),  $\text{Ph}_3\text{P}$  (39 mg, 0.15 mmol), dry DMSO (5 mL) and  $\text{Et}_3\text{N}$  (3 mL) were stirred for 20 min at 60 °C under argon. To the reaction mixture a solution of ethynylbenzene (52 mg, 0.5 mmol) in  $\text{Et}_3\text{N}$  (2 mL) was then added in portions over 1.5 h. The stirring was continued for 15 h at 60 °C. The reaction mixture was then evaporated without heating to remove the  $\text{Et}_3\text{N}$ . The residue was diluted with water (50 mL) and extracted with  $\text{CH}_2\text{Cl}_2$  ( $5 \times 20$  mL). The combined organic extracts were dried over  $\text{Na}_2\text{SO}_4$  and filtered. The solvent was evaporated to dryness. Flash column chromatography was then carried out similarly to *Method A*. Yield **7a**: 136 mg (62%); **9a**: 31 mg (30%).

Compound **7a** was obtained as a yellow solid, mp 105–106 °C (*n*-hexane).  $^1\text{H}$  NMR (250 MHz,  $\text{CDCl}_3$ ):  $\delta$  = 2.97 (s, 6 H), 3.12 (s, 6 H), 7.19 (d,  $J$  = 8.6 Hz, 1 H), 7.34–7.46 (m, 4 H), 7.49 (d,  $J$  = 8.4 Hz, 1 H), 7.53–7.61 (m, 2 H), 7.83 (d,  $J$  = 8.6 Hz, 1 H) ppm.  $^{13}\text{C}$  NMR (62.9 MHz,  $\text{CDCl}_3$ ):  $\delta$  = 43.6, 45.6, 90.0, 95.6, 103.2, 119.1, 124.0, 125.5, 126.6, 128.4, 128.6, 131.2, 131.4, 131.8, 137.3(2), 137.3(3), 151.1, 152.4 ppm. UV/Vis ( $\text{CHCl}_3$ ):  $\lambda_{\text{max}}$  [ $\log \epsilon$ ]: 287 [4.70], 301 [4.66], 332 sh [4.13], 390 sh [3.73] nm. HRMS (ESI):  $m/z$  calcd. for  $\text{C}_{22}\text{H}_{22}\text{IN}_2^+$  [ $\text{M}+\text{H}^+$ ]: 441.0823, found 441.0826.

Compound **9a** was obtained as a yellow solid, mp 156–157 °C (EtOH). UV/Vis ( $\text{CHCl}_3$ ):  $\lambda_{\text{max}}$  [ $\log \epsilon$ ]: 312 [4.83], 321 [4.84], 378 sh [3.96], 405 [4.05] nm. The compound was identical to that previously obtained in our laboratory.<sup>[3]</sup>

**2-Iodo-7-((4-methoxyphenyl)ethynyl)-*N*<sup>1</sup>,*N*<sup>1</sup>,*N*<sup>8</sup>,*N*<sup>8</sup>-tetramethylnaphthalene-1,8-diamine (7b) and 2,7-bis((4-methoxyphenyl)ethynyl)-*N*<sup>1</sup>,*N*<sup>1</sup>,*N*<sup>8</sup>,*N*<sup>8</sup>-tetramethylnaphthalene-1,8-diamine (9b)**

*Method A.* Compounds **7b** and **9b** were synthesized similarly to **7a** and **9a** using copper(I) (4-methoxyphenyl)acetylide (97 mg, 0.5 mmol). Flash column chromatography was carried out on Al<sub>2</sub>O<sub>3</sub> (2 × 20 cm) with *n*-hexane/CH<sub>2</sub>Cl<sub>2</sub> 5:1 (v/v) as the eluent. The first yellow fraction with *R*<sub>f</sub> = 0.3–0.4 gave compound **7b** (96 mg, 41%). The second yellow fraction was eluted using CH<sub>2</sub>Cl<sub>2</sub>. Fraction with *R*<sub>f</sub> = 0.3 gave compound **9b** (3 mg, 2.5%).

*Method B.* Compounds **7b** and **9b** were synthesized similarly to **7a** and **9a** using 1-ethynyl-4-methoxybenzene (66 mg, 0.5 mmol). The purification was carried out similarly to *Method A*. Yield **7b**: 120 mg (51%); **9b**: 25 mg (21%).

Compound **7b** was obtained as a yellow solid, mp 111–112 °C (*n*-hexane). <sup>1</sup>H NMR (250 MHz, CDCl<sub>3</sub>): δ = 2.97 (s, 6 H), 3.11 (s, 6 H), 3.85 (s, 3 H), 6.92 (d, *J* = 8.3 Hz, 2 H), 7.19 (d, *J* = 8.5 Hz, 1 H), 7.42 (d, *J* = 8.3 Hz, 1 H), 7.45–7.59 (m, 3 H), 7.83 (d, *J* = 8.5 Hz, 1 H) ppm. <sup>13</sup>C NMR (62.9 MHz, CDCl<sub>3</sub>): δ = 43.6, 45.6, 55.5, 88.6, 95.7, 103.4, 114.2, 116.1, 119.5, 125.5, 126.6, 131.4, 132.0, 132.6, 137.0(9), 137.1(2), 151.0, 152.0, 159.8 ppm. UV/Vis (CHCl<sub>3</sub>): λ<sub>max</sub> [log ε]: 293–307 [4.66], 342 [4.31], 394 sh [3.65] nm. HRMS (ESI): *m/z* calcd. for C<sub>23</sub>H<sub>24</sub>IN<sub>2</sub>O<sup>+</sup> [M+H<sup>+</sup>]: 471.0928, found 471.0928.

Compound **9b** was obtained as a yellow solid, mp 161–163 °C (CHCl<sub>3</sub>). <sup>1</sup>H NMR (250 MHz, CDCl<sub>3</sub>): δ = 3.16 (s, 12 H), 3.84 (s, 6 H), 6.86–6.94 (m, 4 H), 7.33 (d, *J* = 8.3 Hz, 2 H), 7.39 (d, *J* = 8.3 Hz, 2 H), 7.45–7.53 (m, 4 H) ppm. <sup>13</sup>C NMR (62.9 MHz, CDCl<sub>3</sub>): δ = 44.9, 55.5, 89.4, 94.5, 114.2, 116.5, 117.4, 123.6, 126.6, 131.3, 132.5, 137.3, 152.4, 159.6 ppm. UV/Vis (CHCl<sub>3</sub>): λ<sub>max</sub> [log ε]: 317–323 [4.89], 386 [4.07], 402 [4.06] nm. HRMS (ESI): *m/z* calcd. for C<sub>32</sub>H<sub>31</sub>N<sub>2</sub>O<sub>2</sub><sup>+</sup> [M+H<sup>+</sup>]: 475.2380, found 475.2386.

**2-Iodo-*N*<sup>1</sup>,*N*<sup>1</sup>,*N*<sup>8</sup>,*N*<sup>8</sup>-tetramethyl-7-((4-(trifluoromethyl)phenyl)ethynyl)naphthalene-1,8-diamine (7c) and *N*<sup>1</sup>,*N*<sup>1</sup>,*N*<sup>8</sup>,*N*<sup>8</sup>-tetramethyl-2,7-bis((4-(trifluoromethyl)phenyl)ethynyl)naphthalene-1,8-diamine (9c)**

*Method A.* Compounds **7c** and **9c** were synthesized similarly to **7a** and **9a** using copper(I) (4-(trifluoromethyl)phenyl)acetylide (116 mg, 0.5 mmol). Flash column chromatography was carried out on Al<sub>2</sub>O<sub>3</sub> (2 × 20 cm) with *n*-hexane as the eluent. The first yellow fraction with *R*<sub>f</sub> = 0.5 gave compound **7c** (114 mg, 45 %). The second yellow fraction with *R*<sub>f</sub> = 0.1–0.2 gave compound **9c** (15 mg, 11 %).

*Method B.* Compounds **7c** and **9c** were synthesized similarly to **7a** and **9a** using 1-ethynyl-4-(trifluoromethyl)benzene (85 mg, 0.5 mmol). The purification was carried out similarly to *Method A*. Yield **7c**: 135 mg (53 %); **9c**: 30 mg (22 %).

Compound **7c** was obtained as a yellow solid, mp 87–88 °C (EtOH). <sup>1</sup>H NMR (250 MHz, CDCl<sub>3</sub>): δ = 2.99 (s, 6 H), 3.12 (s, 6 H), 7.19 (d, *J* = 8.4 Hz, 1 H), 7.43 (d, *J* = 8.4 Hz, 1 H), 7.49 (d, *J* = 8.4 Hz, 1 H), 7.65 (s, 4 H), 7.85 (d, *J* = 8.4 Hz, 1 H) ppm. <sup>13</sup>C NMR (62.9 MHz, CDCl<sub>3</sub>): δ = 43.7, 45.7, 92.5, 94.1, 102.7, 118.1, 124.1 (q, *J* = 272.1 Hz), 125.4(8), 125.5(4) (q, *J* = 3.7 Hz), 126.5, 127.8, 130.0 (q, *J* = 32.6 Hz), 131.2, 131.3, 131.5, 137.6, 137.8, 151.2, 152.9 ppm. UV/Vis (CHCl<sub>3</sub>): λ<sub>max</sub> [log ε]: 289 [4.86], 306 [4.84], 343 [4.76], 369 sh [4.66] nm. HRMS (ESI): *m/z* calcd. for C<sub>23</sub>H<sub>21</sub>F<sub>3</sub>IN<sub>2</sub><sup>+</sup> [M+H<sup>+</sup>]: 509.0696, found 509.0703.

Compound **9c** was obtained as a yellow solid, mp 148–149 °C (EtOH). <sup>1</sup>H NMR (250 MHz, CDCl<sub>3</sub>): δ = 3.19 (s, 12 H), 7.33 (d, *J* = 8.3 Hz, 2 H), 7.41 (d, *J* = 8.3 Hz, 2 H), 7.63 (s, 8 H) ppm. <sup>13</sup>C NMR (62.9 MHz, CDCl<sub>3</sub>): δ = 45.1, 93.4 (2C), 115.7, 123.3, 124.2 (q, *J* = 272.1 Hz), 125.4(8) (q, *J* = 3.8 Hz), 125.4(9), 128.1, 129.7 (q, *J* = 32.6 Hz), 131.2, 131.8, 138.3, 153.2 ppm. UV/Vis (CHCl<sub>3</sub>): λ<sub>max</sub> [log ε]: 296 [4.71], 316 [4.78], 329 [4.83], 374 sh [4.07], 415 [4.19] nm. HRMS (ESI): *m/z* calcd. for C<sub>32</sub>H<sub>25</sub>F<sub>6</sub>N<sub>2</sub><sup>+</sup> [M+H<sup>+</sup>]: 551.1917, found 551.1906.

**4-((1,8-Bis(dimethylamino)-7-iodonaphthalen-2-yl)ethynyl)benzonitrile (7d) and 4,4'-((1,8-bis(dimethylamino)naphthalene-2,7-diyl)bis(ethyne-2,1-diyl))dibenzonitrile (9d)**

*Method A.* Compounds **7d** and **9d** were synthesized similarly to **7a** and **9a** using copper(I) (4-cyanophenyl)acetylide (95 mg, 0.5 mmol). Flash column chromatography was carried out on Al<sub>2</sub>O<sub>3</sub> (2 × 20 cm) with *n*-hexane/CH<sub>2</sub>Cl<sub>2</sub> 5:1 (v/v) as the eluent. The first yellow fraction with *R<sub>f</sub>* = 0.3 gave compound **7d** (56 mg, 24%). The second yellow fraction with *R<sub>f</sub>* = 0.6–0.7 was eluted using CH<sub>2</sub>Cl<sub>2</sub>. From it compound **9d** was isolated (10 mg, 9%).

*Method B.* Compounds **7d** and **9d** were synthesized similarly to **7a** and **9a** using 4-ethynylbenzonitrile (64 mg, 0.5 mmol). The purification was carried out similarly to *Method A*. Yield **7d**: 114 mg (49%); **9d**: 30 mg (26%).

Compound **7d** was obtained as a yellow solid, mp 153–155 °C (EtOH). <sup>1</sup>H NMR (250 MHz, CDCl<sub>3</sub>): δ = 2.98 (s, 6 H), 3.11 (s, 6 H), 7.19 (d, *J* = 8.6 Hz, 1 H), 7.40 (d, *J* = 8.4 Hz, 1 H), 7.48 (d, *J* = 8.4 Hz, 1 H), 7.59–7.69 (m, 4 H), 7.85 (d, *J* = 8.6 Hz, 1 H) ppm. <sup>13</sup>C NMR (62.9 MHz, CDCl<sub>3</sub>): δ = 43.7, 45.8, 93.8, 94.7, 102.4, 111.5, 117.6, 118.7, 125.4, 126.4, 128.9, 131.1, 131.3, 131.5, 132.3, 137.7, 138.0, 151.2, 153.1 ppm. UV/Vis (CHCl<sub>3</sub>): λ<sub>max</sub> [log ε]: 284 [4.63], 300 sh [4.61], 314 sh [4.58], 343 sh [4.33], 418 sh [3.80] nm. HRMS (ESI): *m/z* calcd. for C<sub>23</sub>H<sub>21</sub>IN<sub>3</sub><sup>+</sup> [M+H<sup>+</sup>]: 466.0775, found 466.0770.

Compound **9d** was obtained as an orange solid, mp 211–212 °C (EtOH). <sup>1</sup>H NMR (250 MHz, CDCl<sub>3</sub>): δ = 3.18 (s, 12 H), 7.32 (d, *J* = 8.4 Hz, 2 H), 7.40 (d, *J* = 8.4 Hz, 2 H), 7.56–7.68 (m, 8 H) ppm. <sup>13</sup>C NMR (62.9 MHz, CDCl<sub>3</sub>): δ = 45.2, 93.3, 95.6, 111.2, 115.0, 118.8, 123.2, 125.0, 129.2, 131.4, 132.0, 132.3, 138.6, 153.4 ppm. UV/Vis (CHCl<sub>3</sub>): λ<sub>max</sub> [log ε]: 306 [4.66], 331 [4.65], 343 [4.74], 436 [4.21] nm. HRMS (ESI): *m/z* calcd. for C<sub>32</sub>H<sub>25</sub>N<sub>4</sub><sup>+</sup> [M+H<sup>+</sup>]: 465.2074, found 465.2080.

**2-Iodo-N<sup>1</sup>,N<sup>1</sup>,N<sup>8</sup>,N<sup>8</sup>-tetramethyl-7-((4-nitrophenyl)ethynyl)naphthalene-1,8-diamine (7e) and N<sup>1</sup>,N<sup>1</sup>,N<sup>8</sup>,N<sup>8</sup>-tetramethyl-2,7-bis((4-nitrophenyl)ethynyl)naphthalene-1,8-diamine (9e)**

*Method A.* Compounds **7e** and **9e** were synthesized similarly to **7a** and **9a** using copper(I) (4-nitrophenyl)acetylide (105 mg, 0.5 mmol). Flash column chromatography was carried out on Al<sub>2</sub>O<sub>3</sub> (2 × 20 cm) with *n*-hexane/CH<sub>2</sub>Cl<sub>2</sub> 5:1 (v/v) as the eluent. The first orange fraction with *R<sub>f</sub>* = 0.3–0.4 gave compound **7e** (73 mg, 30%). The second red fraction with *R<sub>f</sub>* = 0.6–0.7 was eluted using CH<sub>2</sub>Cl<sub>2</sub>. From it compound **9e** was isolated (8 mg, 5%).

*Method B.* Compounds **7e** and **9e** were synthesized similarly to **7a** and **9a** using 1-ethynyl-4-nitrobenzene (74 mg, 0.5 mmol). The purification was carried out similarly to *Method A*. Yield **7e**: 102 mg (42%); **9e**: 13 mg (10%).

Compound **7e** was obtained as a red solid, mp 121–122 °C (EtOH). <sup>1</sup>H NMR (250 MHz, CDCl<sub>3</sub>): δ = 2.99 (s, 6 H), 3.12 (s, 6 H), 7.19 (d, *J* = 8.5 Hz, 1 H), 7.41 (d, *J* = 8.5 Hz, 1 H), 7.48 (d, *J* = 8.5 Hz, 1 H), 7.68 (d, *J* = 7.9 Hz, 2 H), 7.86 (d, *J* = 8.5 Hz, 1 H), 8.25 (d, *J* = 7.9 Hz, 2 H) ppm. <sup>13</sup>C NMR

(62.9 MHz, CDCl<sub>3</sub>):  $\delta$  = 43.8, 45.8, 93.7, 95.7, 102.2, 117.4, 123.9, 125.4, 126.4, 130.9, 131.1, 131.2, 131.7, 137.8, 138.1, 147.0, 151.3, 153.3 ppm. UV/Vis (CHCl<sub>3</sub>):  $\lambda_{\text{max}}$  [log  $\epsilon$ ]: 273 sh [4.69], 320 [4.54], 357 sh [4.44] nm. HRMS (ESI):  $m/z$  calcd. for C<sub>22</sub>H<sub>21</sub>IN<sub>3</sub>O<sub>2</sub><sup>+</sup> [M+H<sup>+</sup>]: 486.0673, found 486.0678.

Compound **9e** was obtained as red-brown crystals with a greenish metallic luster, mp 210–211 °C (DCE). <sup>1</sup>H NMR (250 MHz, CDCl<sub>3</sub>):  $\delta$  = 3.21 (s, 12 H), 7.33 (d,  $J$  = 8.3 Hz, 2 H), 7.42 (d,  $J$  = 8.3 Hz, 2 H), 7.65 (d,  $J$  = 8.8 Hz, 4 H), 8.24 (d,  $J$  = 8.8 Hz, 4 H) ppm. <sup>13</sup>C NMR (62.9 MHz, CDCl<sub>3</sub>):  $\delta$  = 45.3, 93.2, 96.7, 114.7, 123.1, 123.9, 124.7, 131.2, 131.5, 132.1, 138.8, 146.8, 153.6 ppm. UV/Vis (CHCl<sub>3</sub>):  $\lambda_{\text{max}}$  [log  $\epsilon$ ]: 287 [4.46], 330 [4.66], 365 sh [4.53], 465 [4.28] nm. HRMS (ESI):  $m/z$  calcd. for C<sub>30</sub>H<sub>25</sub>N<sub>4</sub>O<sub>4</sub><sup>+</sup> [M+H<sup>+</sup>]: 505.1871, found 505.1867.

***N*<sup>1</sup>,*N*<sup>1</sup>,*N*<sup>8</sup>,*N*<sup>8</sup>-Tetramethyl-2-(phenylethynyl)-7-((trimethylsilyl)ethynyl)naphthalene-1,8-diamine (10a) and 2-ethynyl-*N*<sup>1</sup>,*N*<sup>1</sup>,*N*<sup>8</sup>,*N*<sup>8</sup>-tetramethyl-7-(phenylethynyl)naphthalene-1,8-diamine (6a)**

A mixture of iodide **7a** (88 mg, 0.2 mmol), CuI (4 mg, 0.02 mmol), Pd(PPh<sub>3</sub>)<sub>2</sub>Cl<sub>2</sub> (7 mg, 0.01 mmol), dry DMSO (4 mL) and Et<sub>3</sub>N (4 mL) was stirred at 80 °C for 20 min under argon. To the reaction mixture trimethylsilylacetylene (58 mg, 0.08 mL, 0.6 mmol) was then added in portions over 1 h. The stirring was continued for 15 h at 80 °C. The reaction mixture was then evaporated without heating to remove the Et<sub>3</sub>N. The residue was diluted with water (50 mL) and extracted with CH<sub>2</sub>Cl<sub>2</sub> (5 × 20 mL). The combined organic extracts were dried over Na<sub>2</sub>SO<sub>4</sub> and filtered. The solvent was evaporated to dryness. The residue was treated with *n*-hexane (30 mL) and filtered; the filtrate was evaporated to dryness. The crude product was recrystallized from EtOH. Yield: 74 mg (90%). Compound **10a** was obtained as a yellow solid, mp 132–133 °C (EtOH). <sup>1</sup>H NMR (250 MHz, CDCl<sub>3</sub>):  $\delta$  = 0.28 (s, 9 H), 3.11 (s, 6 H), 3.16 (s, 6 H), 7.24–7.44 (m, 7 H), 7.52–7.58 (m, 2 H) ppm. <sup>13</sup>C NMR (62.9 MHz, CDCl<sub>3</sub>):  $\delta$  = 0.1, 44.8, 45.0, 90.8, 94.6, 99.5, 106.4, 116.4, 116.6, 123.2, 123.3, 124.3, 126.0, 128.1, 128.5, 131.1, 131.6, 131.9, 137.8, 152.8, 153.5 ppm. UV/Vis (CHCl<sub>3</sub>):  $\lambda_{\text{max}}$  [log  $\epsilon$ ]: 281 [4.57], 294 [4.74], 298 sh [4.73], 312 [4.80], 331 sh [4.06], 370 [3.93], 400 [3.98] nm. HRMS (ESI):  $m/z$  calcd. for C<sub>27</sub>H<sub>31</sub>N<sub>2</sub>Si<sup>+</sup> [M+H<sup>+</sup>]: 411.2251, found 411.2254.

The column chromatography of crude product **10a** on Al<sub>2</sub>O<sub>3</sub> (2 × 20 cm) with *n*-hexane/CH<sub>2</sub>Cl<sub>2</sub> 5:1 (v/v) as the eluent led to its full desilylation and formation of terminal alkyne **6a**. Compound **6a** was obtained as a yellow solid, mp 85–86 °C (EtOH). <sup>1</sup>H NMR (250 MHz, CDCl<sub>3</sub>):  $\delta$  = 3.13 (s, 6 H), 3.17 (s, 6 H), 3.39 (s, 1 H), 7.28–7.44 (m, 7 H), 7.52–7.59 (m, 2 H) ppm. <sup>13</sup>C NMR (62.9 MHz, CDCl<sub>3</sub>):  $\delta$  = 44.9, 45.0, 82.6, 84.8, 90.7, 94.7, 115.6, 116.7, 123.3, 123.4, 124.3, 126.0, 128.1, 128.5, 131.1, 131.7, 132.0, 137.9, 152.8, 153.7 ppm. UV/Vis (CHCl<sub>3</sub>):  $\lambda_{\text{max}}$  [log  $\epsilon$ ]: 291 [4.68], 296 [4.67], 308 [4.77], 393 [3.98] nm. HRMS (ESI):  $m/z$  calcd. for C<sub>24</sub>H<sub>23</sub>N<sub>2</sub><sup>+</sup> [M+H<sup>+</sup>]: 339.1856, found 339.1860.

***2-((4-Methoxyphenyl)ethynyl)-N*<sup>1</sup>,*N*<sup>1</sup>,*N*<sup>8</sup>,*N*<sup>8</sup>-tetramethyl-7-((trimethylsilyl)ethynyl)naphthalene-1,8-diamine (10b) and 2-ethynyl-7-((4-methoxyphenyl)ethynyl)-*N*<sup>1</sup>,*N*<sup>1</sup>,*N*<sup>8</sup>,*N*<sup>8</sup>-tetramethyl-naphthalene-1,8-diamine (6b)**

Compound **10b** was obtained similarly to **10a** starting from iodide **7b** (94 mg, 0.2 mmol). Yield: 70 mg (80%). Compound **10b** was obtained as a yellow solid, mp 145–146 °C (EtOH). <sup>1</sup>H NMR (250 MHz, CDCl<sub>3</sub>):  $\delta$  = 0.28 (s, 9 H), 3.11 (s, 6 H), 3.14 (s, 6 H), 3.84 (s, 3 H), 7.86–7.94 (m, 2 H), 7.24–7.34 (m, 3 H), 7.38 (d,  $J$  = 8.2 Hz, 1 H), 7.45–7.52 (m, 2 H) ppm. <sup>13</sup>C NMR (62.9 MHz, CDCl<sub>3</sub>):  $\delta$  = 0.1, 44.8, 44.9, 55.5, 89.4, 94.6, 99.5, 106.5, 114.2, 116.5, 116.6, 117.2, 123.3, 123.4, 126.3, 131.6,

131.7, 132.5, 137.6, 152.5, 153.5, 159.6 ppm. UV/Vis (CHCl<sub>3</sub>):  $\lambda_{\text{max}}$  [log  $\epsilon$ ]: 302 sh [4.73], 315 [4.80], 340 sh [4.15], 375 [4.00], 398 [4.00] nm. HRMS (ESI):  $m/z$  calcd. for C<sub>28</sub>H<sub>33</sub>N<sub>2</sub>OSi<sup>+</sup> [M+H<sup>+</sup>]: 441.2357, found 441.2364.

The column chromatography of crude product **10b** on Al<sub>2</sub>O<sub>3</sub> (2 × 20 cm) with *n*-hexane/CH<sub>2</sub>Cl<sub>2</sub> 5:1 (v/v) as the eluent led to its full desilylation and formation of terminal alkyne **6b**. Compound **6b** was obtained as a yellow solid, mp 121–122 °C (EtOH). <sup>1</sup>H NMR (250 MHz, CDCl<sub>3</sub>):  $\delta$  = 3.12 (s, 6 H), 3.15 (s, 6 H), 3.38 (s, 1 H), 3.84 (s, 3 H), 6.90 (d,  $J$  = 8.2 Hz, 2 H), 7.27–7.43 (m, 4 H), 7.49 (d,  $J$  = 8.2 Hz, 2 H) ppm. <sup>13</sup>C NMR (62.9 MHz, CDCl<sub>3</sub>):  $\delta$  = 44.9, 45.0, 55.5, 82.6, 84.8, 89.3, 94.7, 114.2, 115.7, 116.4, 117.3, 123.4, 123.5, 126.2, 131.7, 131.8, 132.5, 137.7, 152.4, 153.6, 159.6 ppm. UV/Vis (CHCl<sub>3</sub>):  $\lambda_{\text{max}}$  [log  $\epsilon$ ]: 297 sh [4.63], 312 [4.72], 338 sh [4.05], 405 sh [3.92] nm. HRMS (ESI):  $m/z$  calcd. for C<sub>25</sub>H<sub>25</sub>N<sub>2</sub>O<sup>+</sup> [M+H<sup>+</sup>]: 369.1961, found 369.1967.

***N*<sup>1</sup>,*N*<sup>1</sup>,*N*<sup>8</sup>,*N*<sup>8</sup>-Tetramethyl-2-((4-(trifluoromethyl)phenyl)ethynyl)-7-((trimethylsilyl)ethynyl)-naphthalene-1,8-diamine (10c) and 2-ethynyl-*N*<sup>1</sup>,*N*<sup>1</sup>,*N*<sup>8</sup>,*N*<sup>8</sup>-tetramethyl-7-((4-(trifluoromethyl)phenyl)ethynyl)naphthalene-1,8-diamine (6c)**

Compound **10c** was obtained similarly to **10a** starting from iodide **7c** (102 mg, 0.2 mmol). Yield: 81 mg (85%). Compound **10c** was obtained as a yellow solid, mp 136–137 °C (EtOH). <sup>1</sup>H NMR (250 MHz, CDCl<sub>3</sub>):  $\delta$  = 0.28 (s, 9 H), 3.11 (s, 6 H), 3.16 (s, 6 H), 7.23–7.41 (m, 4 H), 7.62 (s, 4 H) ppm. <sup>13</sup>C NMR (62.9 MHz, CDCl<sub>3</sub>):  $\delta$  = 0.1, 44.9, 45.1, 93.2, 93.5, 99.8, 106.4, 115.6, 116.5, 123.1, 123.3, 124.2 (q,  $J$  = 272.1 Hz), 125.5 (q,  $J$  = 3.8 Hz), 125.7, 128.2, 129.6 (q,  $J$  = 32.6 Hz), 131.2, 131.5, 132.3, 138.2, 153.3, 153.5 ppm. UV/Vis (CHCl<sub>3</sub>):  $\lambda_{\text{max}}$  [log  $\epsilon$ ]: 280 sh [4.55], 294 [4.69], 304 sh [4.64], 316 [4.71], 408 [4.02] nm. HRMS (ESI):  $m/z$  calcd. for C<sub>28</sub>H<sub>30</sub>F<sub>3</sub>N<sub>2</sub>Si<sup>+</sup> [M+H<sup>+</sup>]: 479.2125, found 479.2127.

The column chromatography of crude product **10c** on Al<sub>2</sub>O<sub>3</sub> (2 × 20 cm) with *n*-hexane/CH<sub>2</sub>Cl<sub>2</sub> 5:1 (v/v) as the eluent led to its full desilylation and formation of terminal alkyne **6c**. Compound **6c** was obtained as a yellow solid, mp 78–79 °C (EtOH). <sup>1</sup>H NMR (250 MHz, CDCl<sub>3</sub>):  $\delta$  = 3.12 (s, 6 H), 3.17 (s, 6 H), 3.39 (s, 1 H), 7.27–7.42 (m, 4 H), 7.62 (s, 4 H) ppm. <sup>13</sup>C NMR (62.9 MHz, CDCl<sub>3</sub>):  $\delta$  = 44.9, 45.1, 82.8, 84.7, 93.3, 93.4, 115.6, 115.7, 123.3, 123.4, 124.2 (q,  $J$  = 272.1 Hz), 125.5 (q,  $J$  = 3.9 Hz), 125.7, 128.1, 129.7 (q,  $J$  = 32.6 Hz), 131.2, 131.6, 132.5, 138.2, 153.3, 153.7 ppm. UV/Vis (CHCl<sub>3</sub>):  $\lambda_{\text{max}}$  [log  $\epsilon$ ]: 276 sh [4.58], 291 [4.70], 299 sh [4.68], 313 [4.75], 400 [4.08] nm. HRMS (ESI):  $m/z$  calcd. for C<sub>25</sub>H<sub>22</sub>F<sub>3</sub>N<sub>2</sub><sup>+</sup> [M+H<sup>+</sup>]: 407.1730, found 407.1730.

**4-((1,8-Bis(dimethylamino)-7-((trimethylsilyl)ethynyl)naphthalen-2-yl)ethynyl)benzonitrile (10d) and 4-((1,8-bis(dimethylamino)-7-ethynyl)naphthalen-2-yl)ethynyl)benzonitrile (6d)**

Compound **10d** was obtained similarly to **10a** starting from iodide **7d** (93 mg, 0.2 mmol). Yield: 72 mg (83%). Compound **10d** was obtained as a yellow solid, mp 170–172 °C (EtOH). <sup>1</sup>H NMR (250 MHz, CDCl<sub>3</sub>):  $\delta$  = 0.27 (s, 9 H), 3.11 (s, 6 H), 3.15 (s, 6 H), 7.22–7.38 (m, 4 H), 7.56–7.67 (m, 4 H) ppm. <sup>13</sup>C NMR (62.9 MHz, CDCl<sub>3</sub>):  $\delta$  = 0.0, 44.9, 45.1, 93.0, 95.8, 99.8, 106.3, 111.0, 114.9, 116.3, 118.8, 123.0, 123.2, 125.3, 129.3, 131.4 (2C), 132.2, 132.5, 138.3, 153.5 (2C) ppm. UV/Vis (CHCl<sub>3</sub>):  $\lambda_{\text{max}}$  [log  $\epsilon$ ]: 283 sh [4.56], 294 [4.62], 307 [4.62], 325 [4.63], 413 [4.06], 442 sh [3.98] nm. HRMS (ESI):  $m/z$  calcd. for C<sub>28</sub>H<sub>29</sub>N<sub>3</sub>Si<sup>+</sup> [M+H<sup>+</sup>]: 436.2204, found 436.2206.

The column chromatography of crude product **10d** on Al<sub>2</sub>O<sub>3</sub> (2 × 20 cm) with *n*-hexane/CH<sub>2</sub>Cl<sub>2</sub> 5:1 (v/v) as the eluent led to its full desilylation and formation of terminal alkyne **6d**. Compound **6d**

was obtained as a yellow solid, mp 138–139 °C (EtOH). <sup>1</sup>H NMR (250 MHz, CDCl<sub>3</sub>): δ = 3.12 (s, 6 H), 3.16 (s, 6 H), 3.39 (s, 1 H), 7.26–7.39 (m, 4 H), 7.56–7.67 (m, 4 H) ppm. <sup>13</sup>C NMR (62.9 MHz, CDCl<sub>3</sub>): δ = 44.9, 45.2, 82.9, 84.6, 93.1, 95.7, 111.0, 115.0, 115.4, 118.8, 123.1, 123.2, 125.3, 129.2, 131.4, 131.5, 132.2, 132.7, 138.4, 153.4, 153.7 ppm. UV/Vis (CHCl<sub>3</sub>): λ<sub>max</sub> [log ε]: 288 [4.60], 307 [4.62], 321 [4.64], 407 [4.08], 441 sh [4.08] nm. HRMS (ESI): *m/z* calcd. for C<sub>25</sub>H<sub>22</sub>N<sub>3</sub><sup>+</sup> [M+H<sup>+</sup>]: 364.1808, found 364.1814.

***N*<sup>1</sup>,*N*<sup>1</sup>,*N*<sup>8</sup>,*N*<sup>8</sup>-Tetramethyl-2-((4-nitrophenyl)ethynyl)-7-((trimethylsilyl)ethynyl)naphthalene-1,8-diamine (10e) and 2-ethynyl-*N*<sup>1</sup>,*N*<sup>1</sup>,*N*<sup>8</sup>,*N*<sup>8</sup>-tetramethyl-7-((4-nitrophenyl)ethynyl)naphthalene-1,8-diamine (6e)**

Compound **10e** was obtained similarly to **10a** starting from iodide **7e** (97 mg, 0.2 mmol). Yield: 76 mg (83%). Compound **10e** was obtained as a red solid, mp 142–144 °C (EtOH). <sup>1</sup>H NMR (250 MHz, CDCl<sub>3</sub>): δ = 0.27 (s, 9 H), 3.12 (s, 6 H), 3.17 (s, 6 H), 7.23–7.39 (m, 4 H), 7.60–7.68 (m, 2 H), 8.19–8.27 (m, 2 H) ppm. <sup>13</sup>C NMR (62.9 MHz, CDCl<sub>3</sub>): δ = 0.0, 44.9, 45.2, 93.0, 97.0, 99.9, 106.2, 114.6, 116.3, 122.9, 123.2, 123.9, 125.2, 131.3(5), 131.3(9), 131.5, 132.7, 138.4, 146.7, 153.5, 153.6 ppm. UV/Vis (CHCl<sub>3</sub>): λ<sub>max</sub> [log ε]: 281 sh [4.54], 290 [4.60], 331 [4.47], 408 [4.03], 460 sh [3.86] nm. HRMS (ESI): *m/z* calcd. for C<sub>27</sub>H<sub>30</sub>N<sub>3</sub>O<sub>2</sub>Si<sup>+</sup> [M+H<sup>+</sup>]: 456.2102, found 456.2103.

The column chromatography of crude product **10e** on Al<sub>2</sub>O<sub>3</sub> (2 × 20 cm) with *n*-hexane/CH<sub>2</sub>Cl<sub>2</sub> 5:1 (v/v) as the eluent led to its full desilylation and formation of terminal alkyne **6e**. Compound **6e** was obtained as a red solid, mp 118–119 °C (EtOH). <sup>1</sup>H NMR (250 MHz, CDCl<sub>3</sub>): δ = 3.12 (s, 6 H), 3.17 (s, 6 H), 3.39 (s, 1 H), 7.26–7.40 (m, 4 H), 7.60–7.68 (m, 2 H), 8.19–8.26 (m, 2 H) ppm. <sup>13</sup>C NMR (62.9 MHz, CDCl<sub>3</sub>): δ = 45.0, 45.2, 82.9, 84.6, 93.0, 96.9, 114.8, 115.4, 123.1, 123.2, 123.9, 125.2, 131.3, 131.4(9), 131.5(2), 132.8, 138.5, 146.8, 153.6, 153.7 ppm. UV/Vis (CHCl<sub>3</sub>): λ<sub>max</sub> [log ε]: 275 sh [4.52], 284 [4.56], 328 [4.49], 404 [4.05], 456 sh [3.92] nm. HRMS (ESI): *m/z* calcd. for C<sub>24</sub>H<sub>22</sub>N<sub>3</sub>O<sub>2</sub><sup>+</sup> [M+H<sup>+</sup>]: 384.1707, found 384.1713.

**7,7'-(Buta-1,3-diyne-1,4-diyl)bis(*N*<sup>1</sup>,*N*<sup>1</sup>,*N*<sup>8</sup>,*N*<sup>8</sup>-tetramethyl-2-(phenylethynyl)naphthalene-1,8-diamine) (5a)**

A mixture of alkyne **6a** (94 mg, 0.28 mmol), CuI (29 mg, 0.15 mmol), TMEDA (45 μL, 0.3 mmol) and diisopropylamine (5 mL) was stirred at room temperature for 20 h under air. The reaction mixture was then evaporated without heating to remove diisopropylamine. The residue was purified by flash column chromatography on Al<sub>2</sub>O<sub>3</sub> (2 × 20 cm) using CH<sub>2</sub>Cl<sub>2</sub> as the eluent. The orange fraction with R<sub>f</sub> = 0.3 gave compound **5a** (59 mg, 63%) as a yellow-orange solid, mp 208–209 °C (EtOAc). <sup>1</sup>H NMR (600 MHz, CDCl<sub>3</sub>): δ = 3.18(0) (s, 12 H), 3.18(1) (s, 12 H), 7.27 (dd, *J* = 8.3, 0.5 Hz, 2 H), 7.30 (dd, *J* = 8.2, 0.5 Hz, 2 H), 7.32–7.39 (m, 8 H), 7.41 (d, *J* = 8.3 Hz, 2 H), 7.53–7.55 (m, 2 H), 7.55–7.56 (m, 2 H) ppm. <sup>13</sup>C NMR (150 MHz, CDCl<sub>3</sub>): δ = 45.0, 45.2, 80.2, 84.1, 90.8, 94.8, 114.7, 116.4, 123.0, 123.1, 124.3, 125.2, 128.1, 128.6, 131.1, 131.8, 132.1, 138.1, 152.7, 154.6 ppm. UV/Vis (CHCl<sub>3</sub>): λ<sub>max</sub> [log ε]: 308 sh [4.93], 323 [5.04], 337 sh [4.92], 432 [4.51] nm. HRMS (ESI): *m/z* calcd. for C<sub>48</sub>H<sub>43</sub>N<sub>4</sub><sup>+</sup> [M+H<sup>+</sup>]: 675.3482, found 675.3482; calcd. for C<sub>48</sub>H<sub>44</sub>N<sub>4</sub><sup>2+</sup> [M+2H<sup>+</sup>]: 338.1778, found 338.1771.



**7,7'-(Buta-1,3-diyne-1,4-diyl)bis(2-((4-methoxyphenyl)ethynyl)-N<sup>1</sup>,N<sup>1</sup>,N<sup>8</sup>,N<sup>8</sup>-tetramethylnaphthalene-1,8-diamine) (5b)**

Compound **5b** was obtained similarly to **5a** starting from alkyne **6b** (103 mg, 0.28 mmol). Yield: 66 mg (64%). Compound **5b** was obtained as a yellow-orange solid, mp 204–205 °C (EtOAc). <sup>1</sup>H NMR (600 MHz, CDCl<sub>3</sub>): δ = 3.16 (s, 12 H), 3.17 (s, 12 H), 3.84 (s, 6 H), 6.90 (m, 4 H), 7.27 (d, *J* = 8.3 Hz, 2 H), 7.29 (d, *J* = 8.3 Hz, 2 H), 7.35 (d, *J* = 8.3 Hz, 2 H), 7.39 (d, *J* = 8.3 Hz, 2 H), 7.47–7.49 (m, 4 H) ppm. <sup>13</sup>C NMR (150 MHz, CDCl<sub>3</sub>): δ = 45.0, 45.2, 55.5, 80.2, 84.1, 89.4, 94.7, 114.3, 114.8, 116.5, 116.9, 123.1, 123.2, 125.5, 131.6, 132.1, 132.5, 137.9, 152.4, 154.6, 159.7 ppm. UV/Vis (CHCl<sub>3</sub>): λ<sub>max</sub> [log ε]: 327 [5.10], 338 sh [5.02], 423 [4.54] nm. HRMS (ESI): *m/z* calcd. for C<sub>50</sub>H<sub>47</sub>N<sub>4</sub>O<sub>2</sub><sup>+</sup> [M+H<sup>+</sup>]: 735.3694, found 735.3694; calcd. for C<sub>50</sub>H<sub>48</sub>N<sub>4</sub>O<sub>2</sub><sup>2+</sup> [M+2H<sup>+</sup>]: 368.1883, found 368.1883.

**7,7'-(Buta-1,3-diyne-1,4-diyl)bis(N<sup>1</sup>,N<sup>1</sup>,N<sup>8</sup>,N<sup>8</sup>-tetramethyl-2-((4-(trifluoromethyl)phenyl)ethynyl)naphthalene-1,8-diamine) (5c)**

Compound **5c** was obtained similarly to **5a** starting from alkyne **6c** (101 mg, 0.25 mmol). Yield: 65 mg (64%). Compound **5c** was obtained as a yellow solid, mp 224–225 °C (EtOAc). <sup>1</sup>H NMR (600 MHz, CDCl<sub>3</sub>): δ = 3.18(0) (s, 12 H), 3.18(3) (s, 12 H), 7.27 (dd, *J* = 8.3, 0.5 Hz, 2 H), 7.30 (dd, *J* = 8.3, 0.5 Hz, 2 H), 7.37–7.40 (m, 4 H), 7.62 (s, 8 H) ppm. <sup>13</sup>C NMR (150 MHz, CDCl<sub>3</sub>): δ = 45.1, 45.2, 80.3, 84.1, 93.4, 93.5, 114.6, 115.3, 123.0, 123.1, 124.2 (q, *J* = 272.1 Hz), 124.9, 125.5 (q, *J* = 3.7 Hz), 128.1, 129.7 (q, *J* = 32.6 Hz), 131.2, 132.0, 132.2, 138.5, 153.2, 154.6 ppm. UV/Vis (CHCl<sub>3</sub>): λ<sub>max</sub> [log ε]: 315 sh [4.99], 327 [5.06], 340 sh [4.98], 437 [4.64] nm. HRMS (ESI): *m/z* calcd. for C<sub>50</sub>H<sub>41</sub>F<sub>6</sub>N<sub>4</sub><sup>+</sup> [M+H<sup>+</sup>]: 811.3230, found 811.3230; calcd. for C<sub>50</sub>H<sub>42</sub>F<sub>6</sub>N<sub>4</sub><sup>2+</sup> [M+2H<sup>+</sup>]: 406.1651, found 406.1659.

**4,4'-((Buta-1,3-diyne-1,4-diyl)bis(1,8-bis(dimethylamino)naphthalene-7,2-diyl))bis(ethyne-2,1-diyl)-dibenzonitrile (5d)**

Compound **5d** was obtained similarly to **5a** starting from alkyne **6d** (109 mg, 0.3 mmol). Yield: 72 mg (66%). Compound **5d** was obtained as an orange solid, mp 230–232 °C (decomp.) (DCE). <sup>1</sup>H NMR (600 MHz, CDCl<sub>3</sub>): δ = 3.17 (s, 12 H), 3.18 (s, 12 H), 7.26 (dd, *J* = 8.3, 0.5 Hz, 2 H), 7.29 (dd, *J* = 8.3, 0.5 Hz, 2 H), 7.37 (d, *J* = 7.0 Hz, 2 H), 7.39 (d, *J* = 7.0 Hz, 2 H), 7.58–7.60 (m, 4 H), 7.63–7.66 (m, 4 H) ppm. <sup>13</sup>C NMR (150 MHz, CDCl<sub>3</sub>): δ = 45.1(8), 45.2(4), 80.3, 84.0, 93.2, 95.8, 111.2, 114.4, 114.7, 118.8, 122.9, 123.0, 124.6, 129.2, 131.4, 131.9, 132.3, 132.5, 138.6, 153.4, 154.6 ppm. UV/Vis (CHCl<sub>3</sub>): λ<sub>max</sub> [log ε]: 318 [5.04], 326 [5.04], 338 [5.06], 385 sh [4.51], 449 [4.54] nm. HRMS (ESI): *m/z* calcd. for C<sub>50</sub>H<sub>41</sub>N<sub>6</sub><sup>+</sup> [M+H<sup>+</sup>]: 725.3387, found 725.3393; calcd. for C<sub>50</sub>H<sub>42</sub>N<sub>6</sub><sup>2+</sup> [M+2H<sup>+</sup>]: 363.1730, found 363.1726.

**7,7'-(Buta-1,3-diyne-1,4-diyl)bis(N<sup>1</sup>,N<sup>1</sup>,N<sup>8</sup>,N<sup>8</sup>-tetramethyl-2-((4-nitrophenyl)ethynyl)naphthalene-1,8-diamine) (5e)**

Compound **5e** was obtained similarly to **5a** starting from alkyne **6e** (115 mg, 0.3 mmol). Yield: 73 mg (64%). Compound **5e** was obtained as a dark red solid, mp 234–235 °C (decomp.) (DCE). <sup>1</sup>H NMR (600 MHz, CDCl<sub>3</sub>): δ = 3.18 (s, 12 H), 3.20 (s, 12 H), 7.27 (d, *J* = 8.2 Hz, 2 H), 7.29 (d, *J* = 8.2 Hz, 2 H), 7.38–7.40 (m, 4 H), 7.63–7.66 (m, 4 H), 8.22–8.25 (m, 4 H) ppm. <sup>13</sup>C NMR (150 MHz, CDCl<sub>3</sub>): δ = 45.2, 45.3, 80.4, 84.1, 93.2, 96.9, 114.4, 122.9, 123.0, 123.9, 124.5, 131.3, 131.5, 132.0,

132.6, 138.7, 146.9, 153.5, 154.6 ppm. UV/Vis (CHCl<sub>3</sub>):  $\lambda_{\text{max}}$  [log  $\epsilon$ ]: 310 [4.83], 332 [4.86], 453 [4.58] nm. HRMS (ESI):  $m/z$  calcd. for C<sub>48</sub>H<sub>41</sub>N<sub>6</sub>O<sub>4</sub><sup>+</sup> [M+H<sup>+</sup>]: 765.3184, found 765.3180.

**2,2'-(Buta-1,3-diyne-1,4-diyl)bis(7-(arylethynyl)-8-(dimethylamino)-N,N-dimethylnaphthalen-1-aminium) bis(tetrafluoroborates) (11) (general procedure)**

To a solution of compound **5** (0.025 mmol) in CH<sub>2</sub>Cl<sub>2</sub> (5–6 mL) 40% aqueous HBF<sub>4</sub> (2.5-fold excess) was added. The reaction mixture was thoroughly stirred for several minutes and diluted with a double volume of Et<sub>2</sub>O. The resulting precipitate was filtered off, washed with Et<sub>2</sub>O and dried in a vacuum giving rise to the desired salt **11**.

**2,2'-(Buta-1,3-diyne-1,4-diyl)bis(8-(dimethylamino)-N,N-dimethyl-7-(phenylethynyl)naphthalen-1-aminium) bis(tetrafluoroborate) (11a)** was obtained in 79% as a gray solid (decomp. > 225 °C). <sup>1</sup>H NMR (600 MHz, DMSO-d<sub>6</sub>): 3.45 (d,  $J$  = 2.1 Hz, 12 H), 3.54 (d,  $J$  = 2.9 Hz, 12 H), 7.54–7.58 (m, 6 H), 7.75–7.79 (m, 4 H), 7.96 (d,  $J$  = 8.5 Hz, 2 H), 7.98 (d,  $J$  = 8.5 Hz, 2 H), 8.21–8.27 (m, 4 H), 19.76 (s, 2 H) ppm. <sup>13</sup>C NMR (62.9 MHz, DMSO-d<sub>6</sub>): 42.8, 43.0, 80.8, 82.9, 84.9, 100.8, 116.6, 118.5, 120.7, 120.9, 129.0, 129.6, 129.8, 130.2, 131.4, 132.6, 133.0, 134.9, 143.0, 146.8 ppm. UV/Vis (CH<sub>3</sub>CN):  $\lambda_{\text{max}}$  [log  $\epsilon$ ]: 286 sh [4.67], 306 [4.77], 316 [4.77], 328 sh [4.72], 345 [4.49], 371 [4.39], 382 sh [4.28] nm.

**2,2'-(Buta-1,3-diyne-1,4-diyl)bis(8-(dimethylamino)-7-((4-methoxyphenyl)ethynyl)-N,N-dimethylnaphthalen-1-aminium) bis(tetrafluoroborate) (11b)** was obtained in 78% as a pale gray solid (decomp. > 222 °C). <sup>1</sup>H NMR (600 MHz, DMSO-d<sub>6</sub>): 3.44 (d,  $J$  = 2.1 Hz, 12 H), 3.53 (d,  $J$  = 3.0 Hz, 12 H), 3.85 (s, 6 H), 7.08–7.12 (m, 4 H), 7.69–7.73 (m, 4 H), 7.92 (d,  $J$  = 8.5 Hz, 2 H), 7.96 (d,  $J$  = 8.5 Hz, 2 H), 8.21 (d,  $J$  = 4.2 Hz, 2 H), 8.22 (d,  $J$  = 4.2 Hz, 2 H), 19.73 (s, 2 H) ppm. <sup>13</sup>C NMR (62.9 MHz, DMSO-d<sub>6</sub>): 42.7, 43.0, 55.5, 80.9, 82.9, 84.0, 101.4, 112.8, 114.8, 116.7, 118.9, 120.8, 129.5, 129.7, 132.5, 133.0, 133.2, 134.7, 142.4, 146.8, 160.7 ppm. UV/Vis (CH<sub>3</sub>CN):  $\lambda_{\text{max}}$  [log  $\epsilon$ ]: 273 [4.56], 283 [4.56], 309 sh [4.64], 326 [4.75], 341 [4.78], 370 [4.48], 387 sh [4.31] nm.

**2,2'-(Buta-1,3-diyne-1,4-diyl)bis(8-(dimethylamino)-N,N-dimethyl-7-((4-(trifluoromethyl)phenyl)ethynyl)naphthalen-1-aminium) bis(tetrafluoroborate) (11c)** was obtained in 86% as a pale yellow solid (decomp. > 228 °C). <sup>1</sup>H NMR (600 MHz, DMSO-d<sub>6</sub>): 3.47 (d,  $J$  = 2.2 Hz, 12 H), 3.53 (d,  $J$  = 2.8 Hz, 12 H), 7.92 (d,  $J$  = 8.2 Hz, 4 H), 7.96–8.03 (m, 8 H), 8.25 (d,  $J$  = 8.7 Hz, 2 H), 8.27 (d,  $J$  = 8.7 Hz, 2 H), 19.73 (s, 2 H) ppm. <sup>13</sup>C NMR (62.9 MHz, DMSO-d<sub>6</sub>): 42.9, 43.1, 80.8, 83.0, 87.1, 98.9, 116.7, 118.0, 120.8, 123.8 (q,  $J$  = 272.5 Hz), 125.2, 125.9 (q,  $J$  = 3.1 Hz), 129.6, 129.8, 129.9 (q,  $J$  = 32.1 Hz), 132.3, 132.9, 133.1, 135.1, 143.7, 146.8 ppm. UV/Vis (CH<sub>3</sub>CN):  $\lambda_{\text{max}}$  [log  $\epsilon$ ]: 290 sh [4.74], 312 [4.80], 320 [4.80], 331 sh [4.73], 347 sh [4.51], 371 [4.38], 382 sh [4.30] nm.

**2,2'-(Buta-1,3-diyne-1,4-diyl)bis(7-((4-cyanophenyl)ethynyl)-8-(dimethylamino)-N,N-dimethylnaphthalen-1-aminium) bis(tetrafluoroborate) (11d)** was obtained in 76% as a beige solid (decomp. > 227 °C). <sup>1</sup>H NMR (600 MHz, DMSO-d<sub>6</sub>): 3.46 (d,  $J$  = 2.2 Hz, 12 H), 3.52 (d,  $J$  = 2.8 Hz, 12 H), 7.95–7.98 (m, 4 H), 7.99–8.01 (m, 4 H), 8.02–8.06 (m, 4 H), 8.25 (d,  $J$  = 8.8 Hz, 2 H), 8.27 (d,  $J$  = 8.8 Hz, 2 H), 19.76 (s, 2 H) ppm. <sup>13</sup>C NMR (62.9 MHz, DMSO-d<sub>6</sub>): 43.0, 43.1, 80.8, 83.0, 88.3, 98.8, 112.3, 116.7, 117.9, 118.2, 120.7, 125.7, 129.6, 129.8, 132.3, 132.8, 132.9(5), 133.0(4), 135.2, 143.8, 146.8 ppm. UV/Vis (CH<sub>3</sub>CN):  $\lambda_{\text{max}}$  [log  $\epsilon$ ]: 285 sh [4.60], 305 sh [4.73], 321 [4.76], 339 [4.71], 371 [4.33], 383 sh [4.24] nm.

**2,2'-(Buta-1,3-diyne-1,4-diyl)bis(8-(dimethylamino)-N,N-dimethyl-7-((4-nitrophenyl)ethynyl)-naphthalen-1-aminium) bis(tetrafluoroborate) (11e)** was obtained in 80% as a gray solid (decomp. > 230 °C). <sup>1</sup>H NMR (600 MHz, DMSO-d<sub>6</sub>): 3.47 (d, *J* = 2.3 Hz, 12 H), 3.53 (d, *J* = 2.8 Hz, 12 H), 8.01 (d, *J* = 8.5 Hz, 2 H), 8.02 (d, *J* = 8.5 Hz, 2 H), 8.04–8.07 (m, 4 H), 8.26 (d, *J* = 8.8 Hz, 2 H), 8.28 (d, *J* = 8.8 Hz, 2 H), 8.36–8.40 (m, 4 H), 19.77 (s, 2 H) ppm. <sup>13</sup>C NMR (62.9 MHz, DMSO-d<sub>6</sub>): 43.0, 43.1, 80.8, 83.1, 89.0, 98.5, 116.6, 117.8, 120.8, 124.0, 127.6, 129.7, 129.8, 132.8, 133.0, 133.1, 135.2, 144.0, 146.8, 147.8 ppm. UV/Vis (CH<sub>3</sub>CN): λ<sub>max</sub> [log ε]: 284 sh [4.36], 307 sh [4.46], 325 [4.54], 347 [4.56], 369 sh [4.37], 385 sh [4.19] nm.

## Copies of NMR spectra

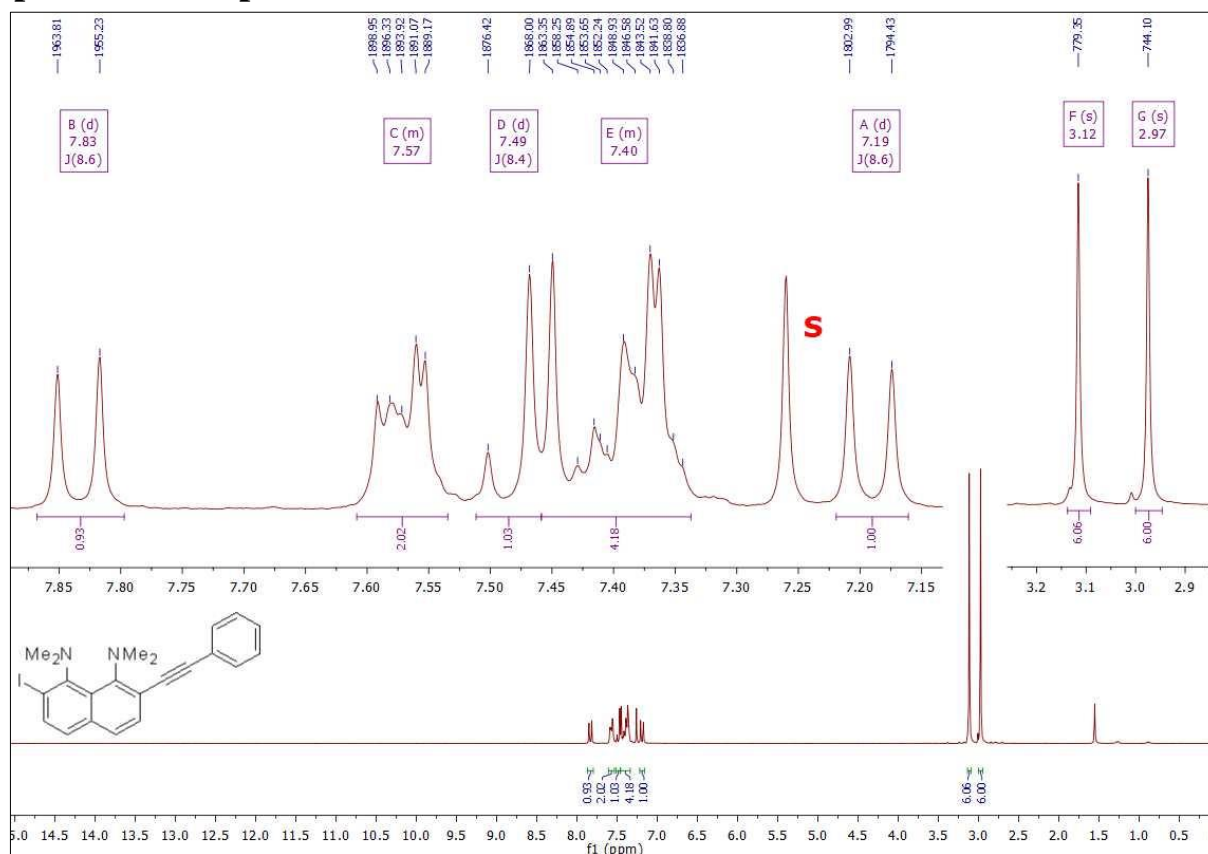

**Figure S1.** <sup>1</sup>H NMR spectrum of compound **7a** (250 MHz, CDCl<sub>3</sub>).

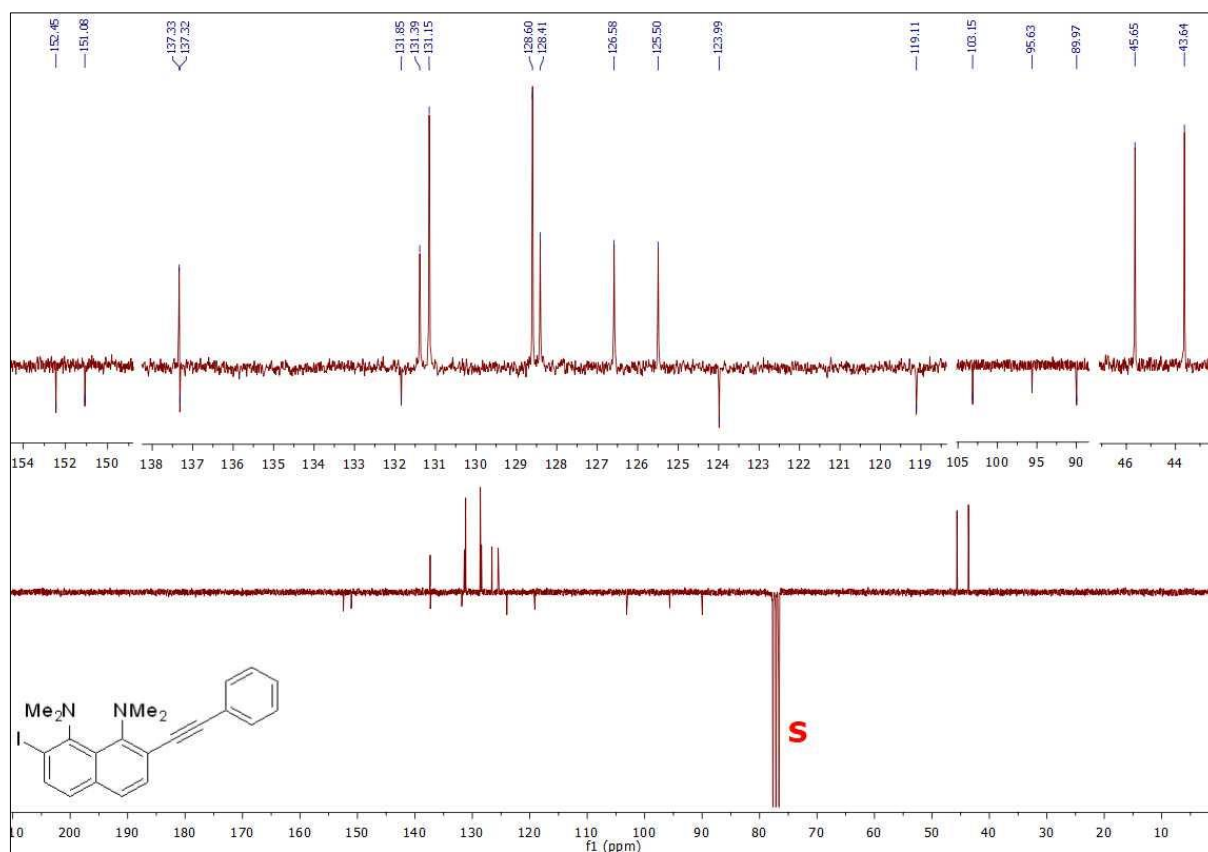

**Figure S2.** <sup>13</sup>C{<sup>1</sup>H} APT-NMR spectrum of compound **7a** (62.9 MHz, CDCl<sub>3</sub>).

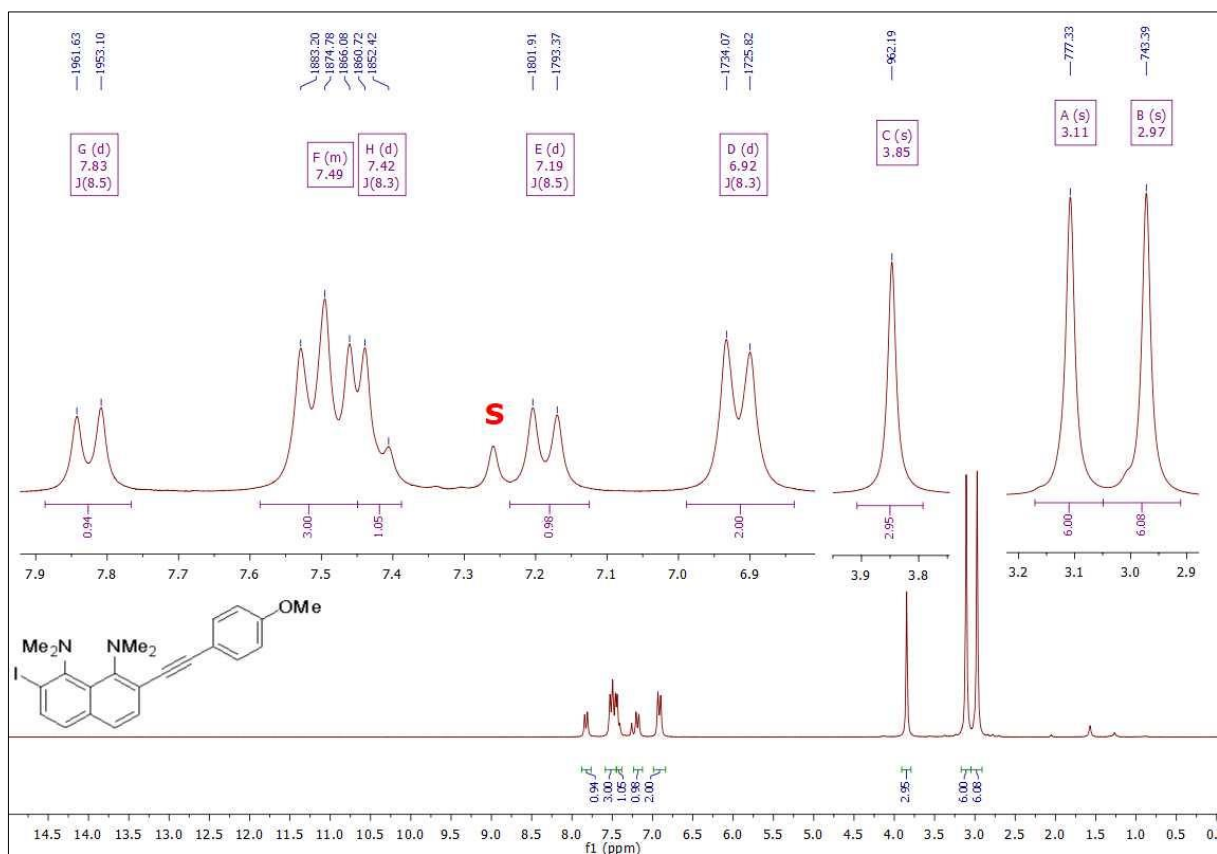

**Figure S3.** <sup>1</sup>H NMR spectrum of compound **7b** (250 MHz, CDCl<sub>3</sub>).

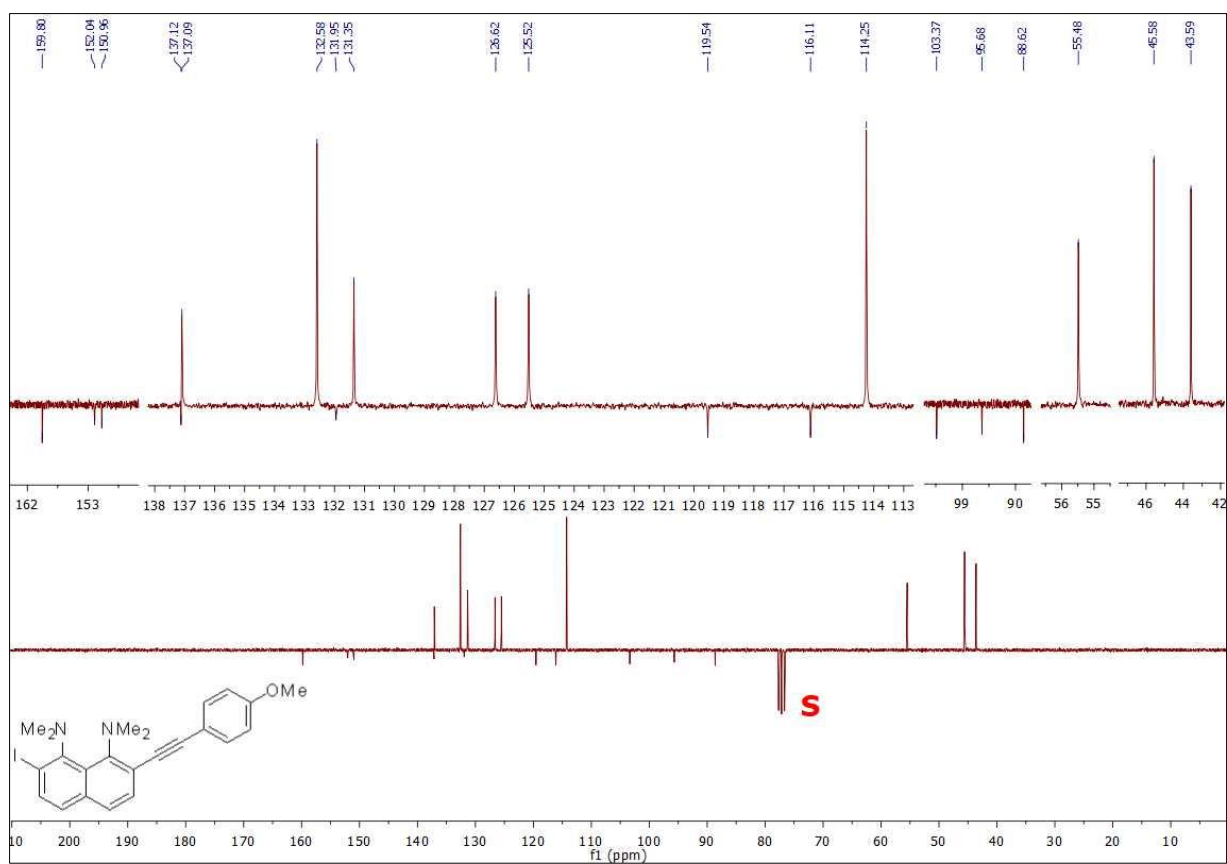

**Figure S4.** <sup>13</sup>C{<sup>1</sup>H} APT-NMR spectrum of compound **7b** (62.9 MHz, CDCl<sub>3</sub>).

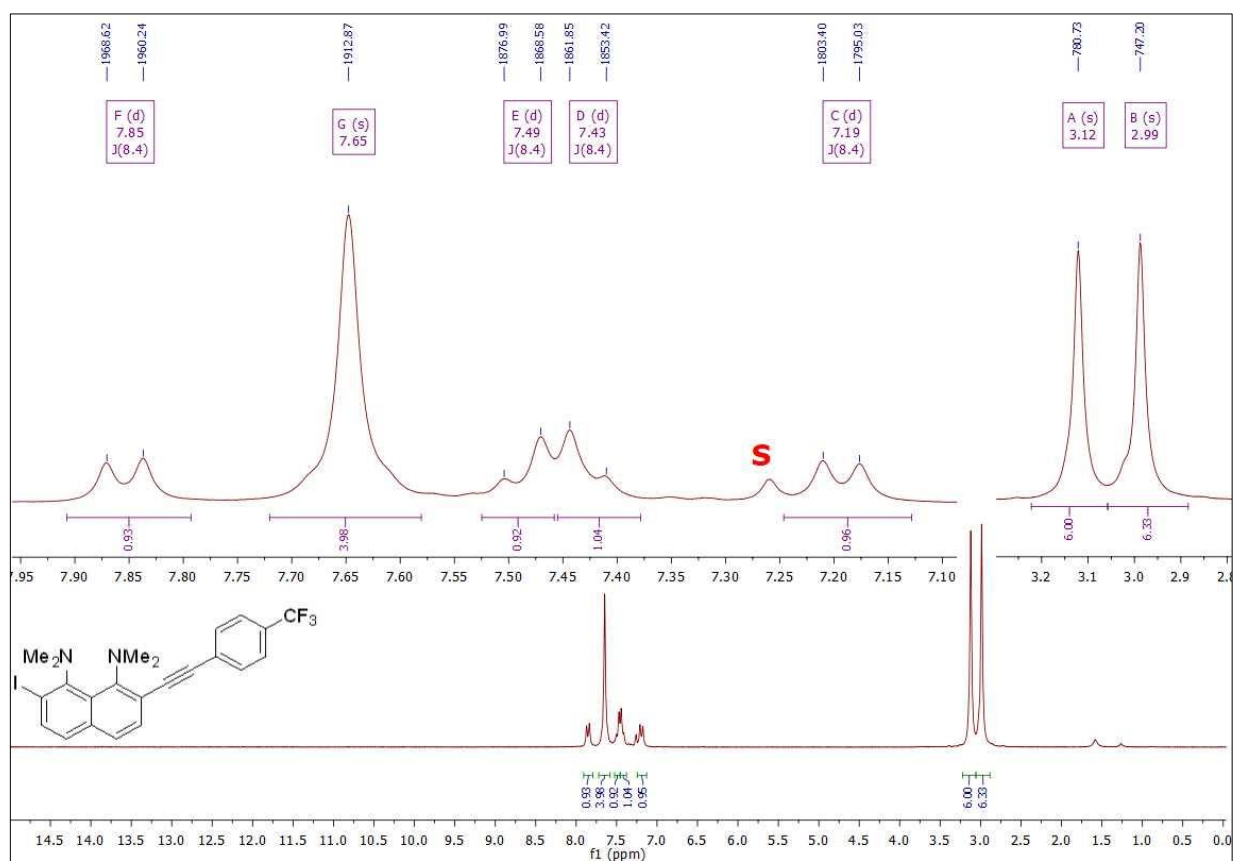

**Figure S5.**  $^1\text{H}$  NMR spectrum of compound **7c** (250 MHz,  $\text{CDCl}_3$ ).

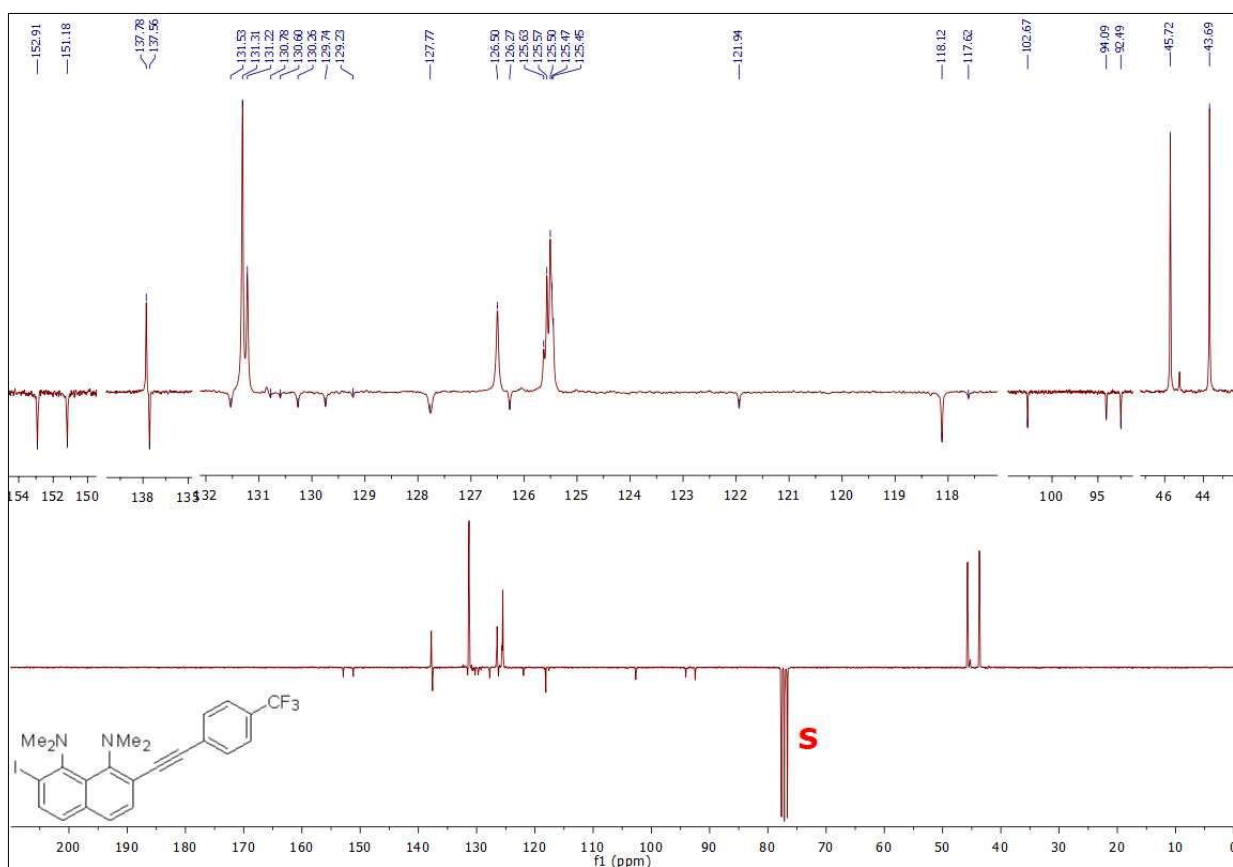

**Figure S6.**  $^{13}\text{C}\{^1\text{H}\}$  APT-NMR spectrum of compound **7c** (62.9 MHz,  $\text{CDCl}_3$ ).

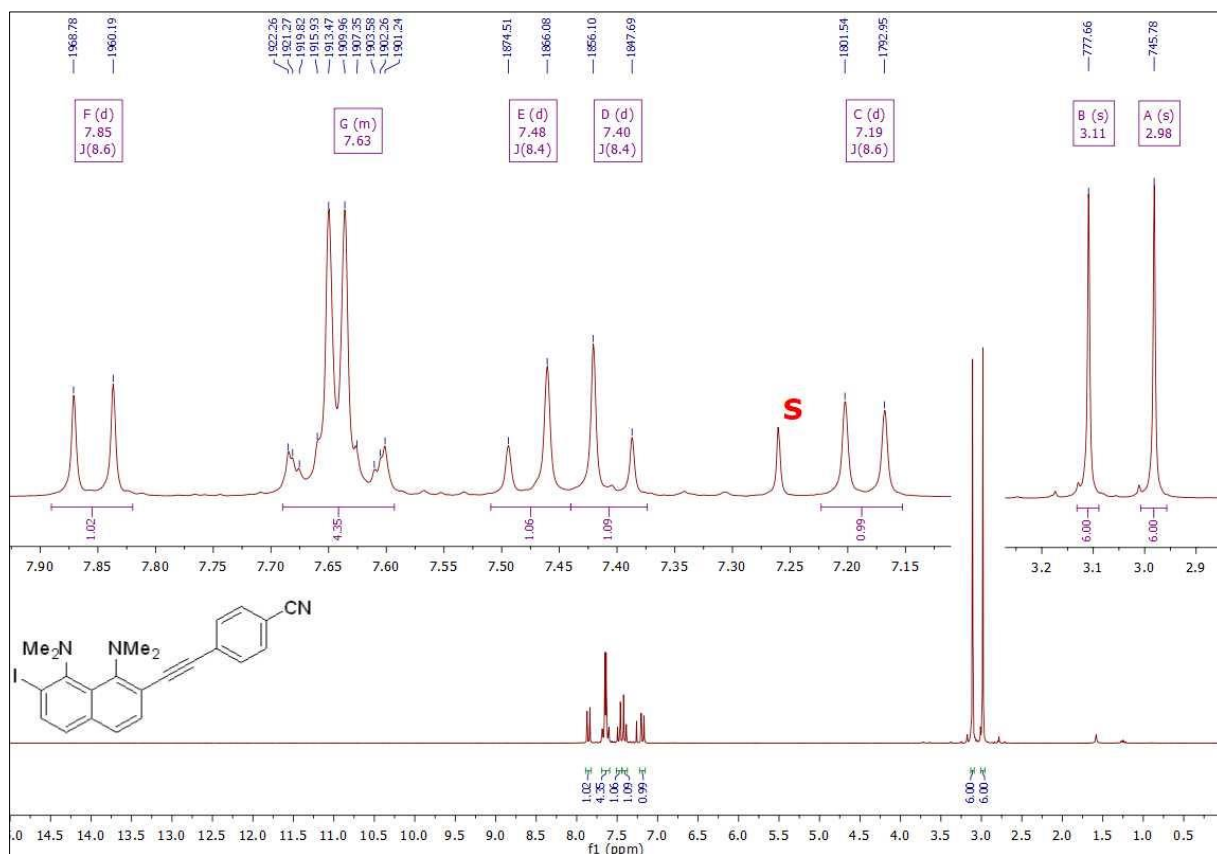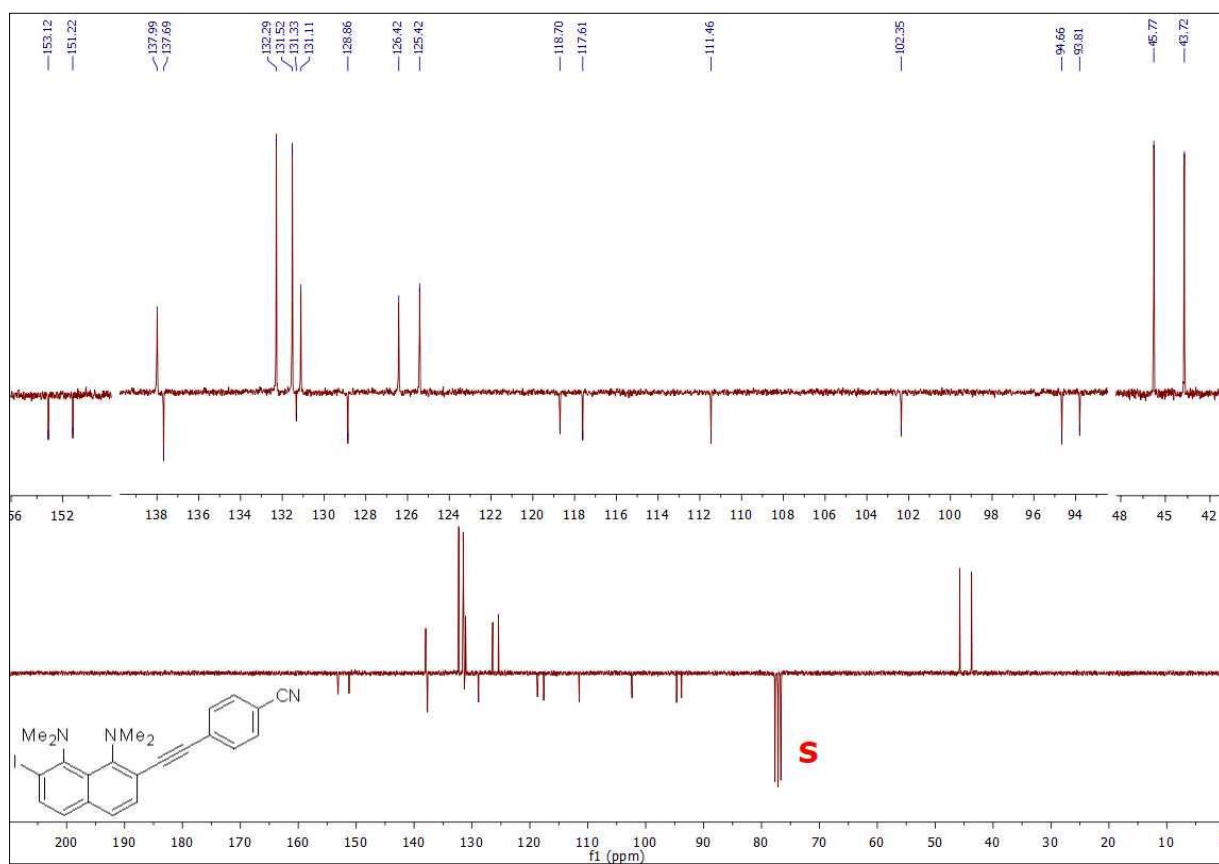



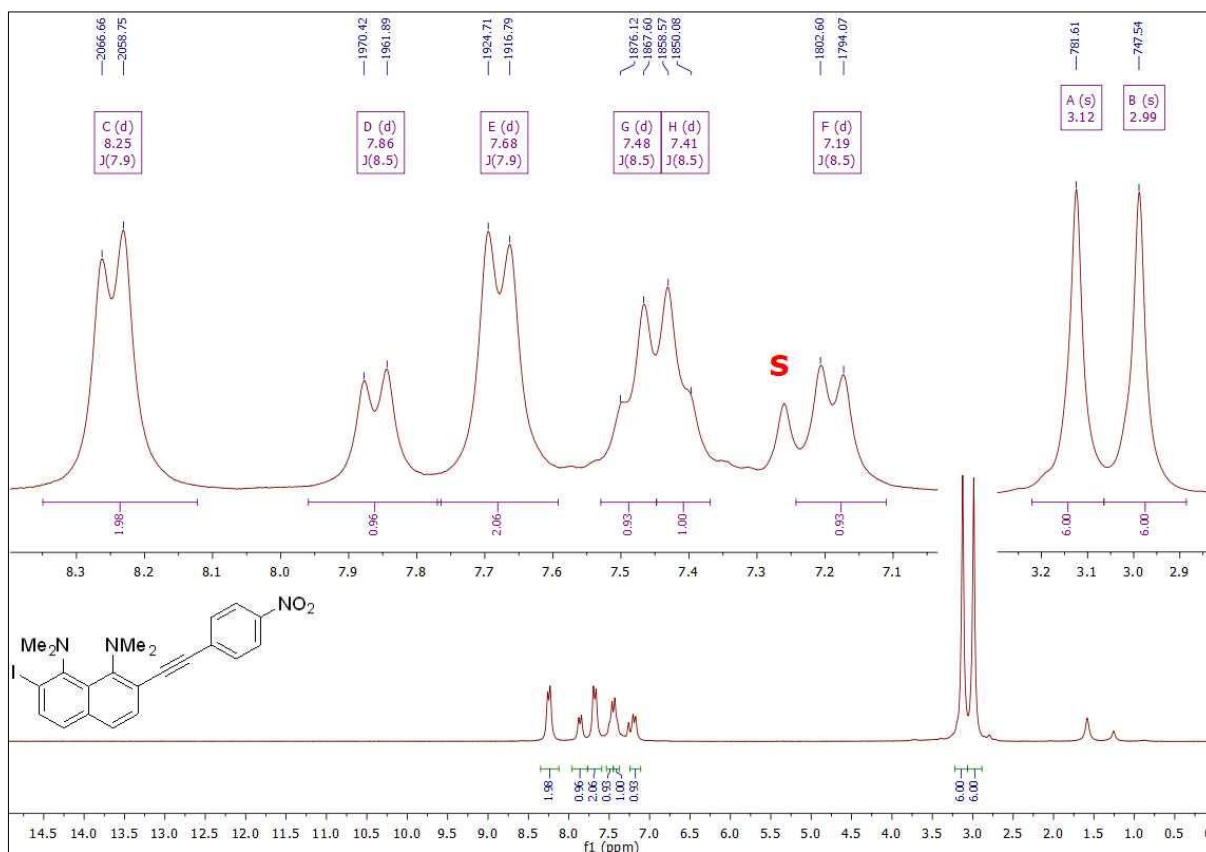

**Figure S9.** <sup>1</sup>H NMR spectrum of compound **7e** (250 MHz, CDCl<sub>3</sub>).

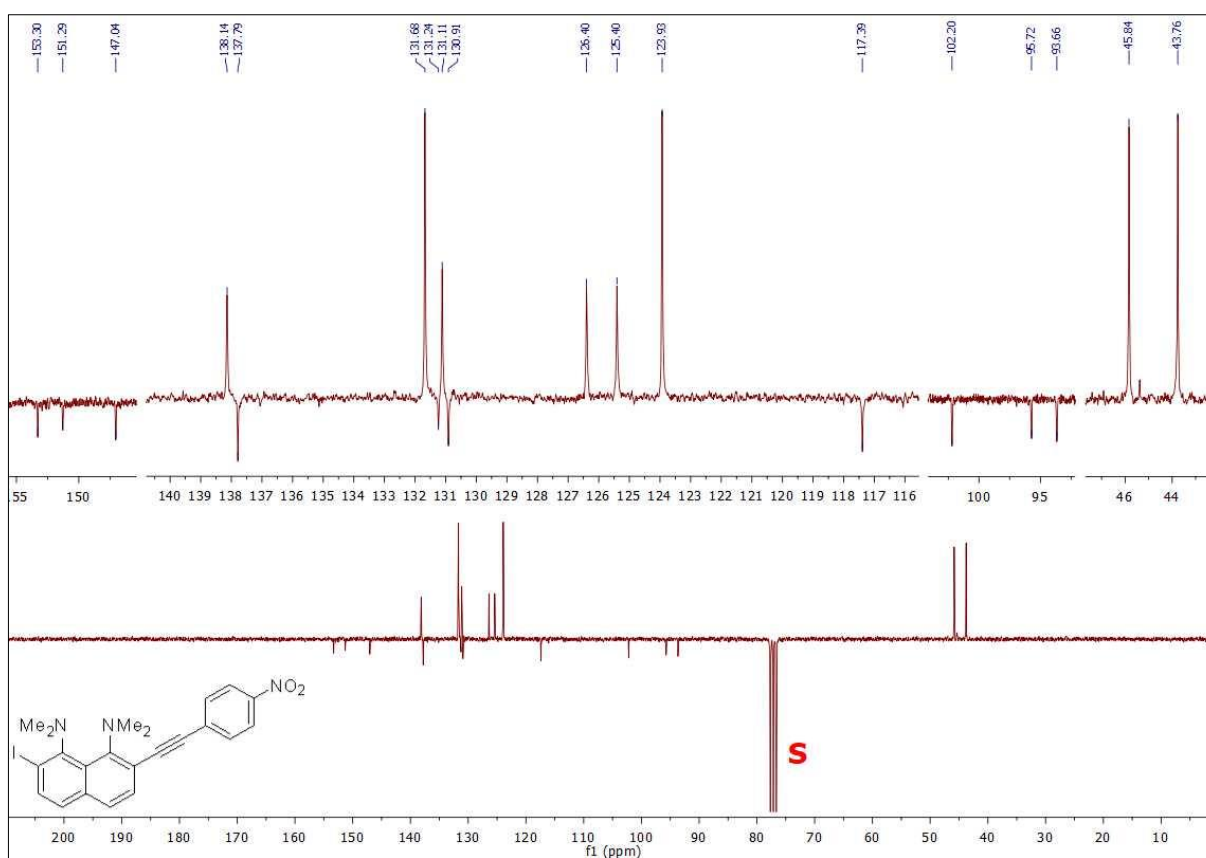

**Figure S10.** <sup>13</sup>C{<sup>1</sup>H} APT-NMR spectrum of compound **7e** (62.9 MHz, CDCl<sub>3</sub>).



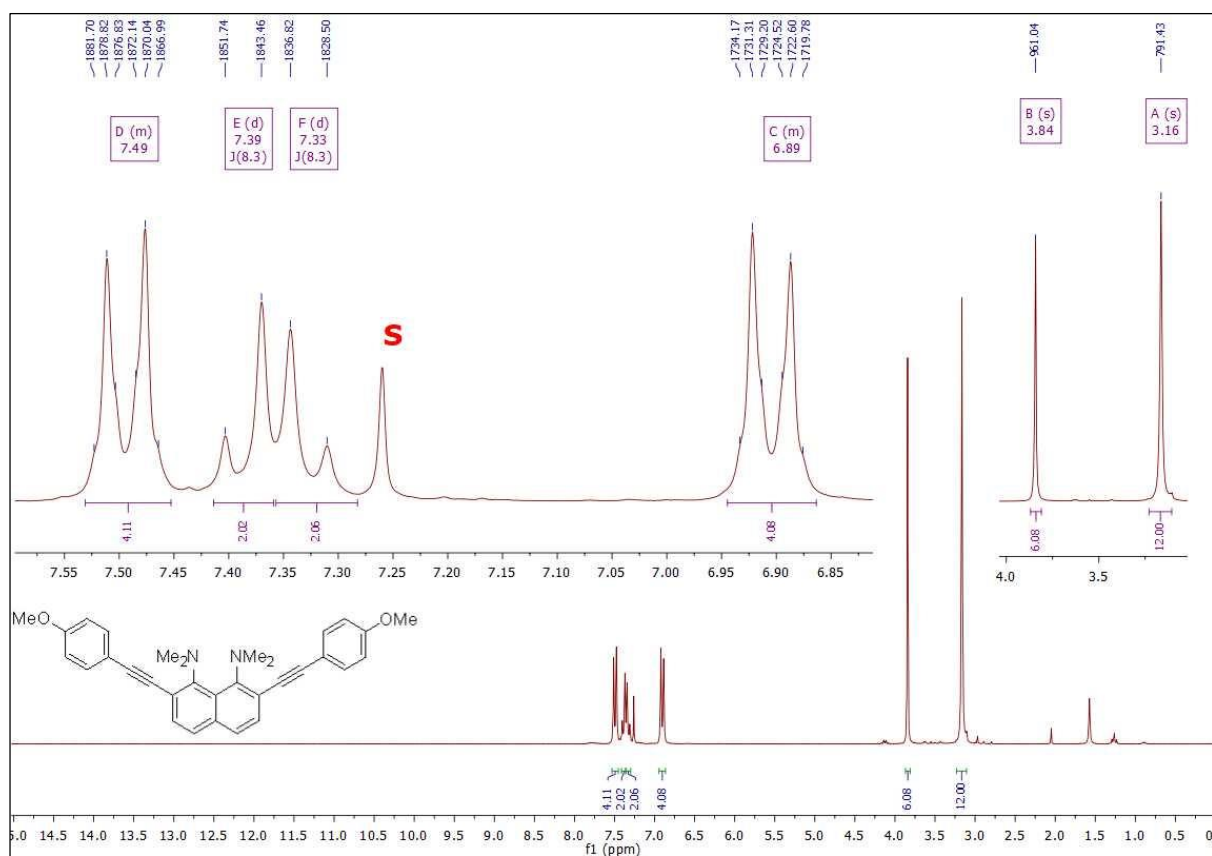

**Figure S11.**  $^1\text{H}$  NMR spectrum of compound **9b** (250 MHz,  $\text{CDCl}_3$ ).

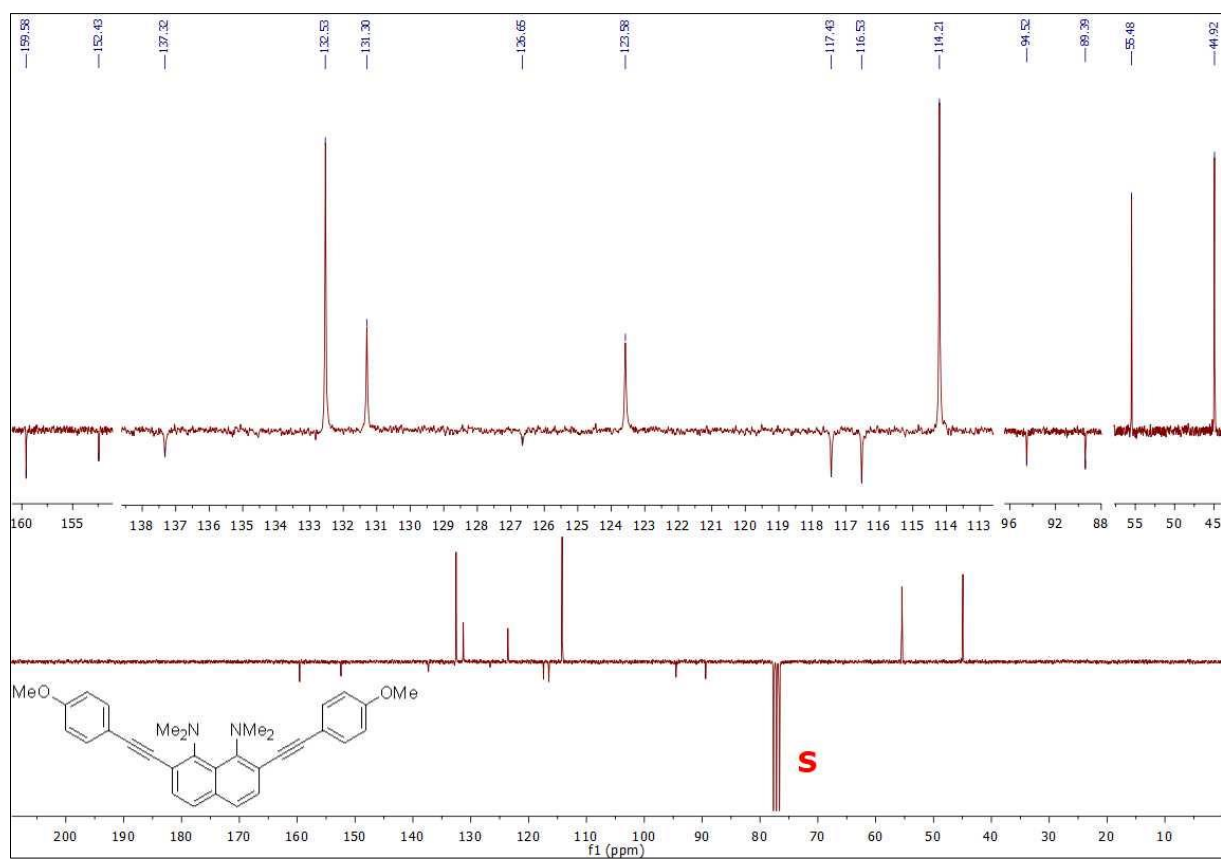

**Figure S12.**  $^{13}\text{C}\{^1\text{H}\}$  APT-NMR spectrum of compound **9b** (62.9 MHz,  $\text{CDCl}_3$ ).

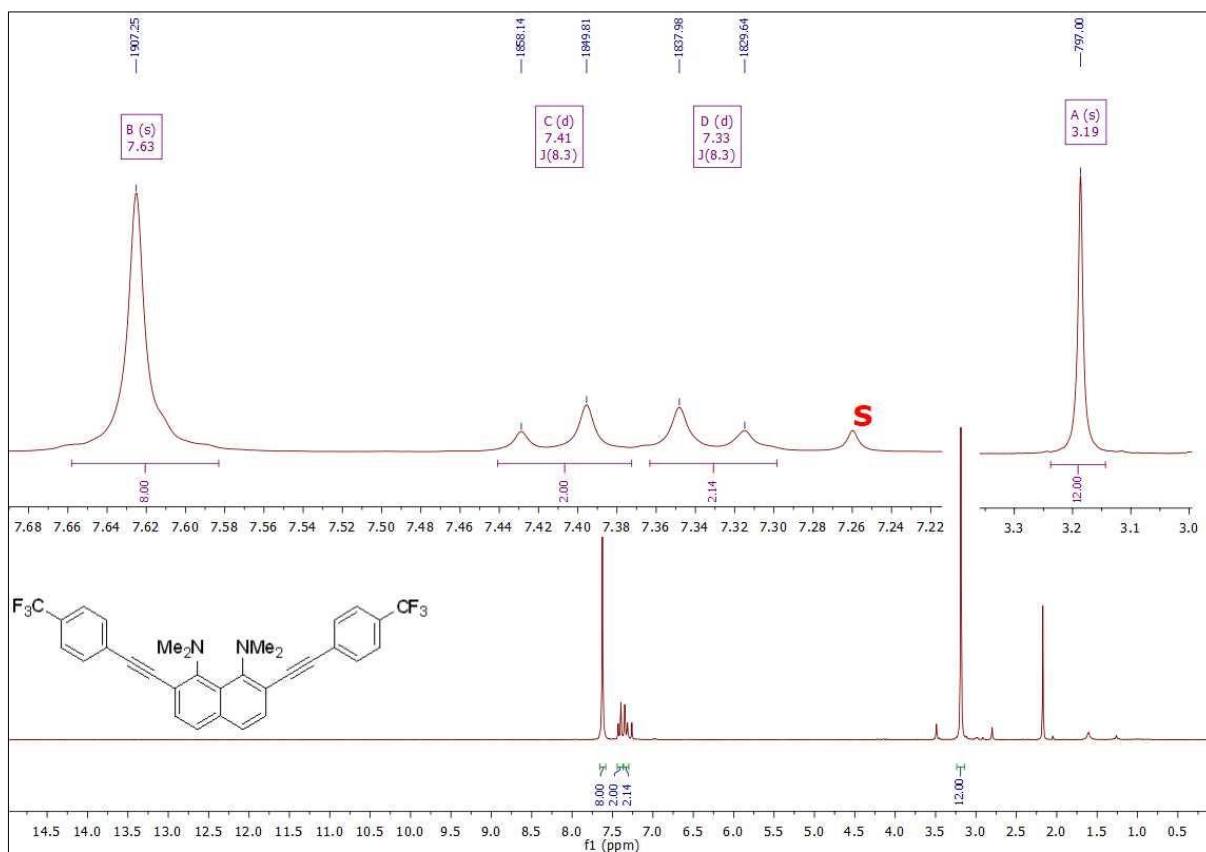

**Figure S13.**  $^1\text{H}$  NMR spectrum of compound **9c** (250 MHz,  $\text{CDCl}_3$ ).

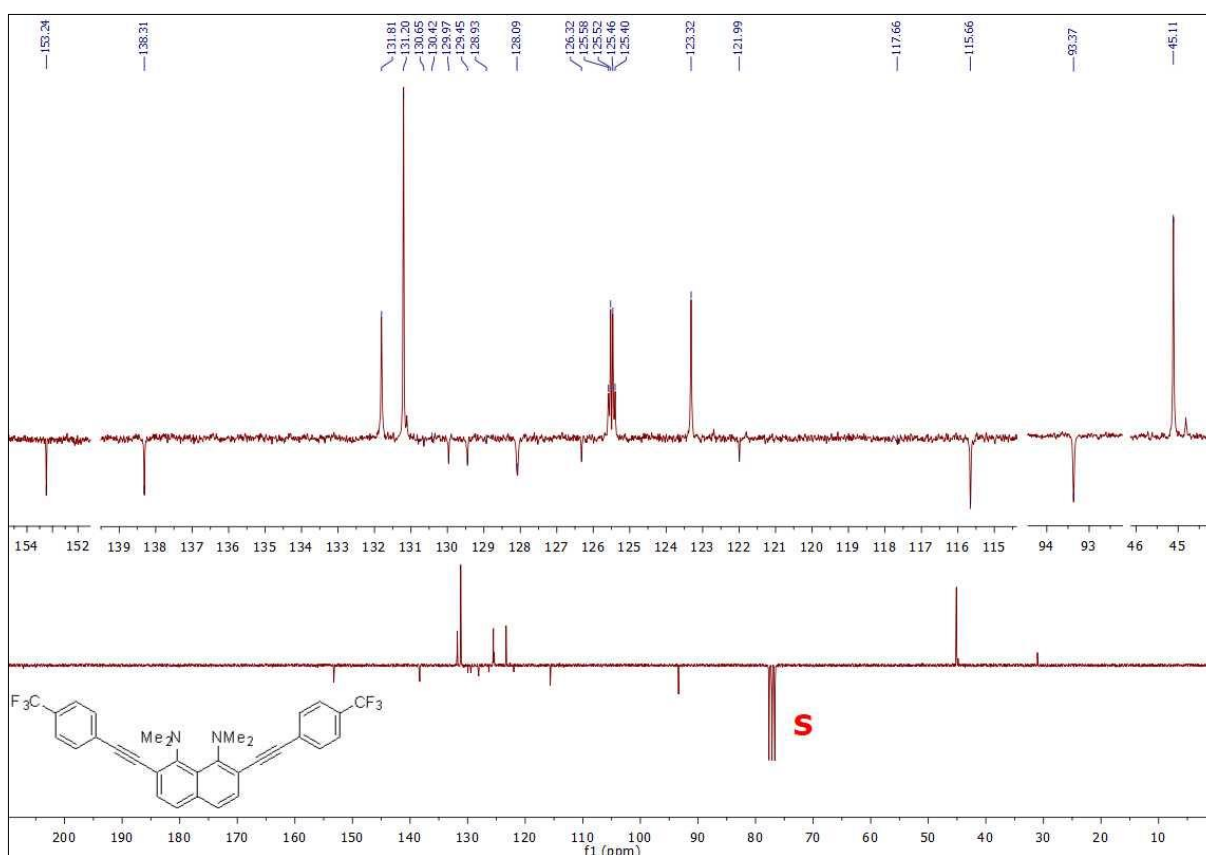

**Figure S14.**  $^{13}\text{C}\{^1\text{H}\}$  APT-NMR spectrum of compound **9c** (62.9 MHz,  $\text{CDCl}_3$ ).

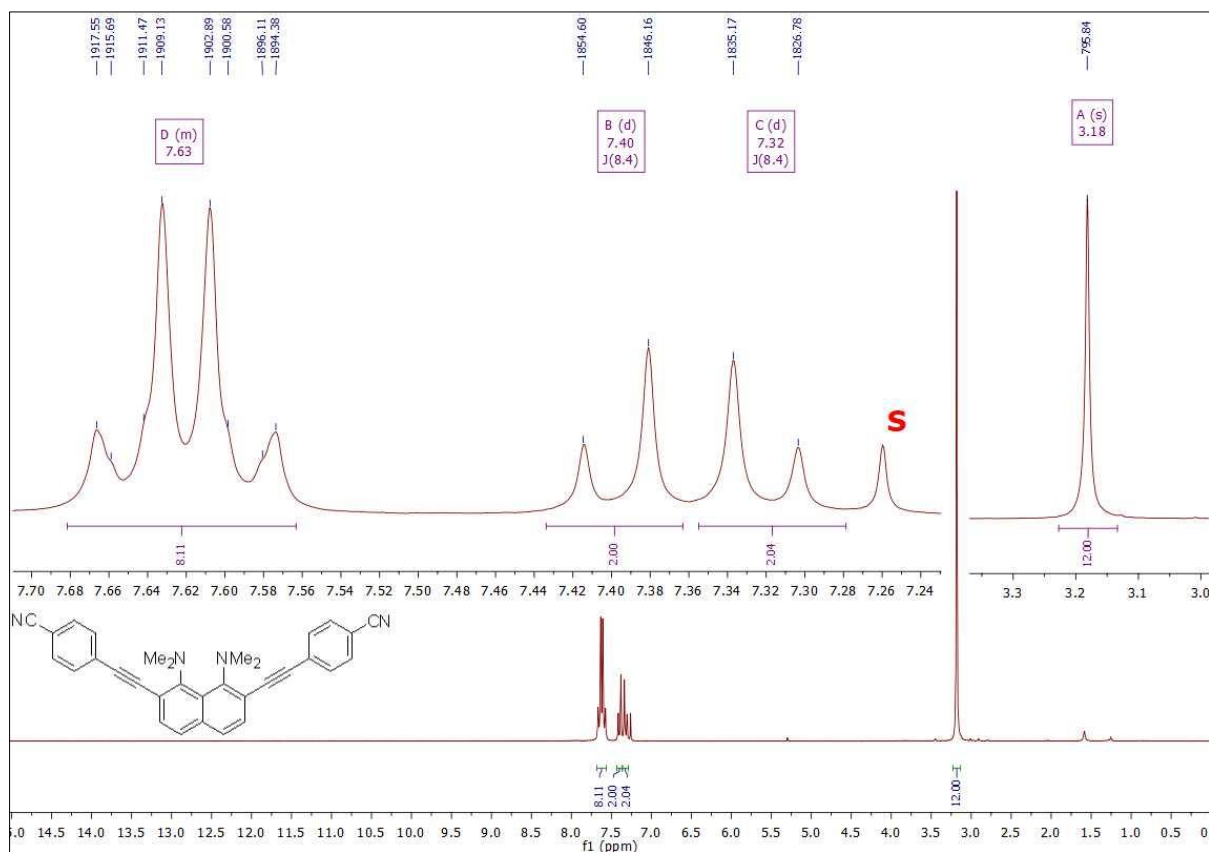

**Figure S15.** <sup>1</sup>H NMR spectrum of compound **9d** (250 MHz, CDCl<sub>3</sub>).

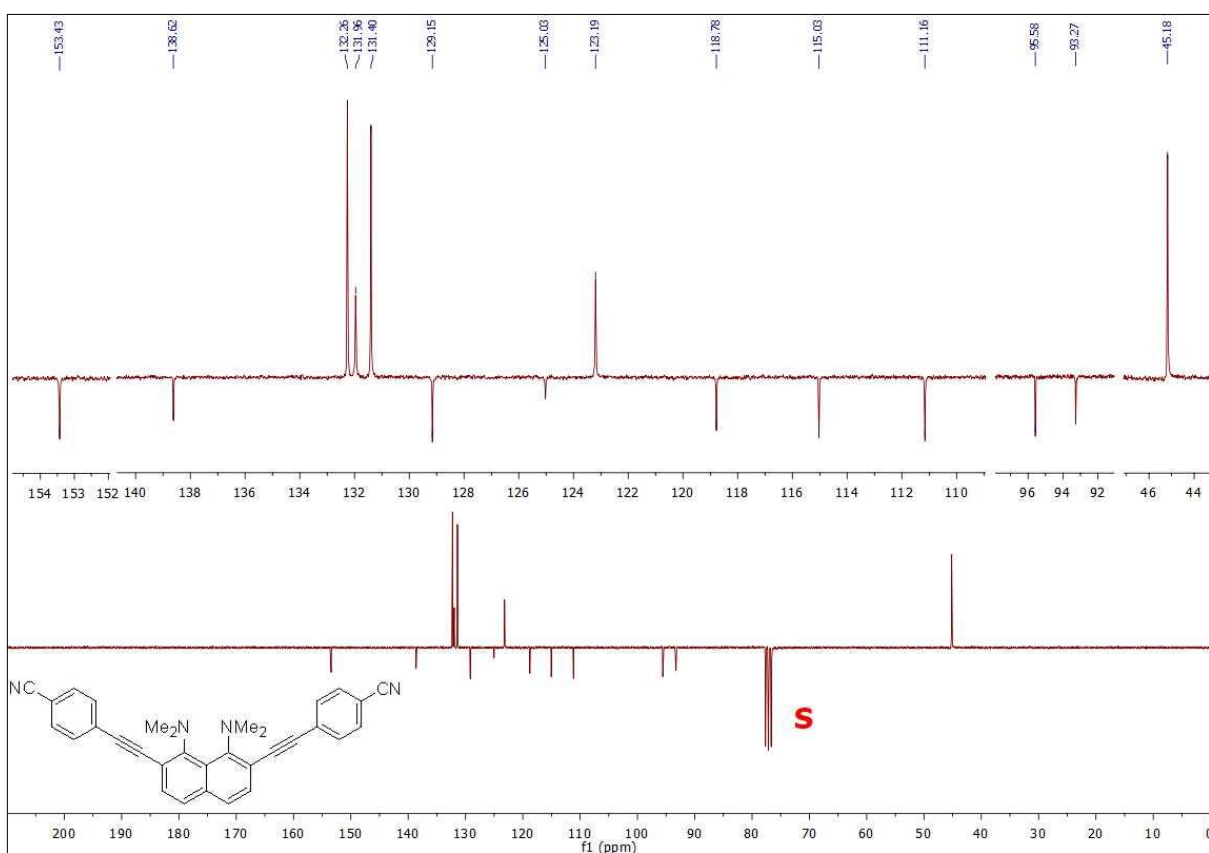

**Figure S16.** <sup>13</sup>C{<sup>1</sup>H} APT-NMR spectrum of compound **9d** (62.9 MHz, CDCl<sub>3</sub>).

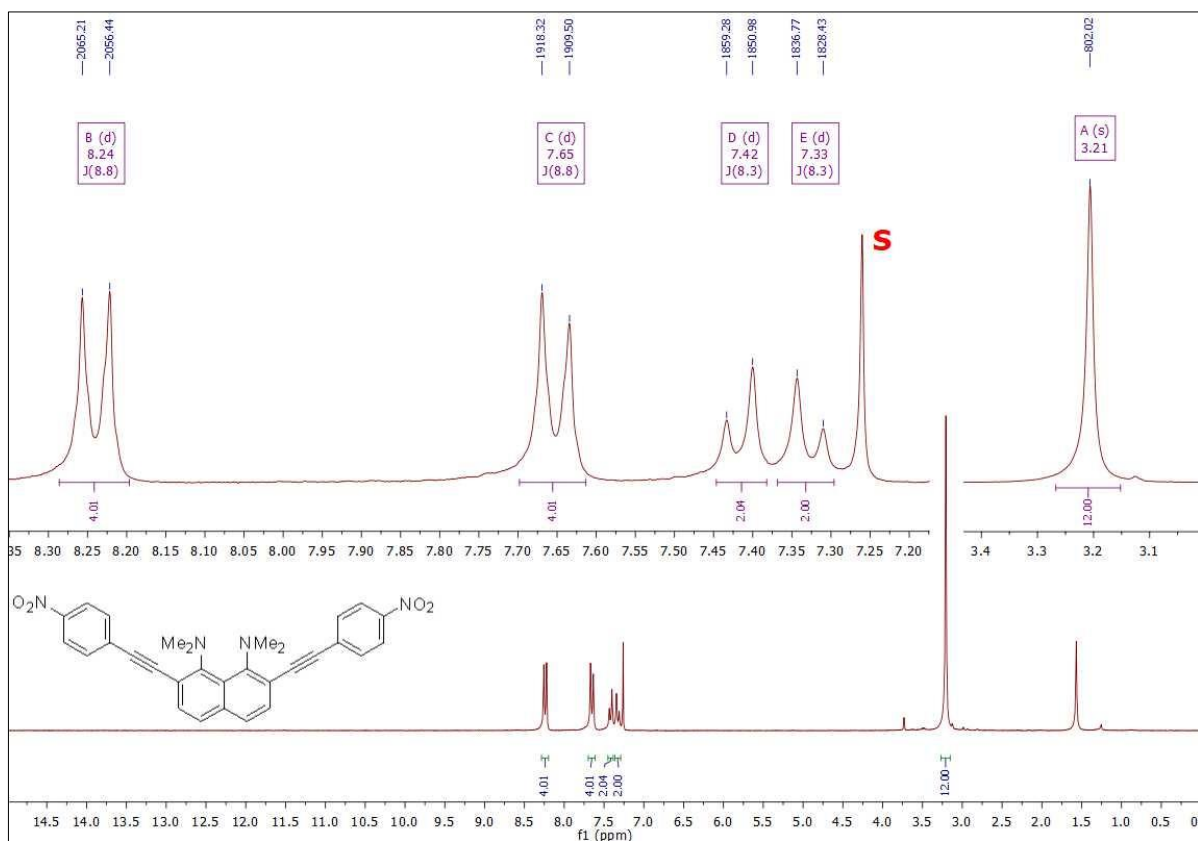

**Figure S17.** <sup>1</sup>H NMR spectrum of compound **9e** (250 MHz, CDCl<sub>3</sub>).

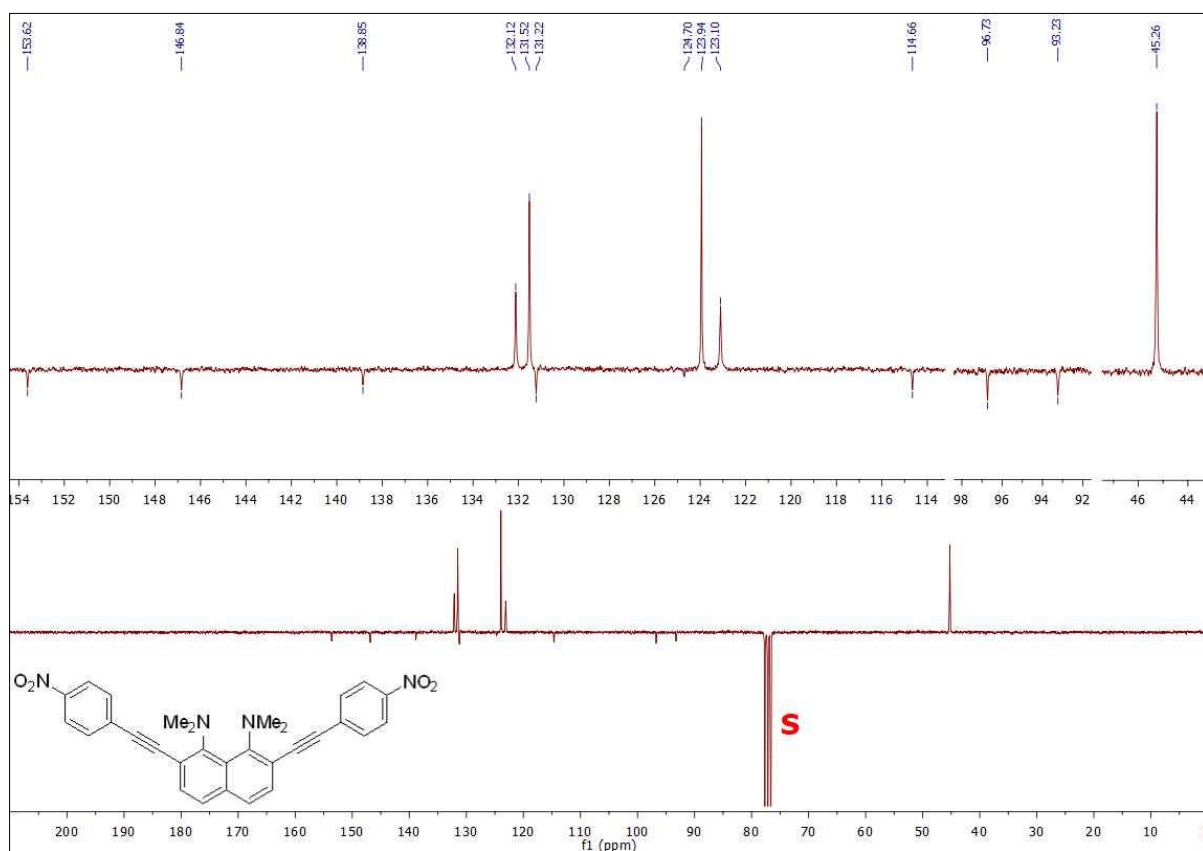

**Figure S18.** <sup>13</sup>C{<sup>1</sup>H} APT-NMR spectrum of compound **9e** (62.9 MHz, CDCl<sub>3</sub>).

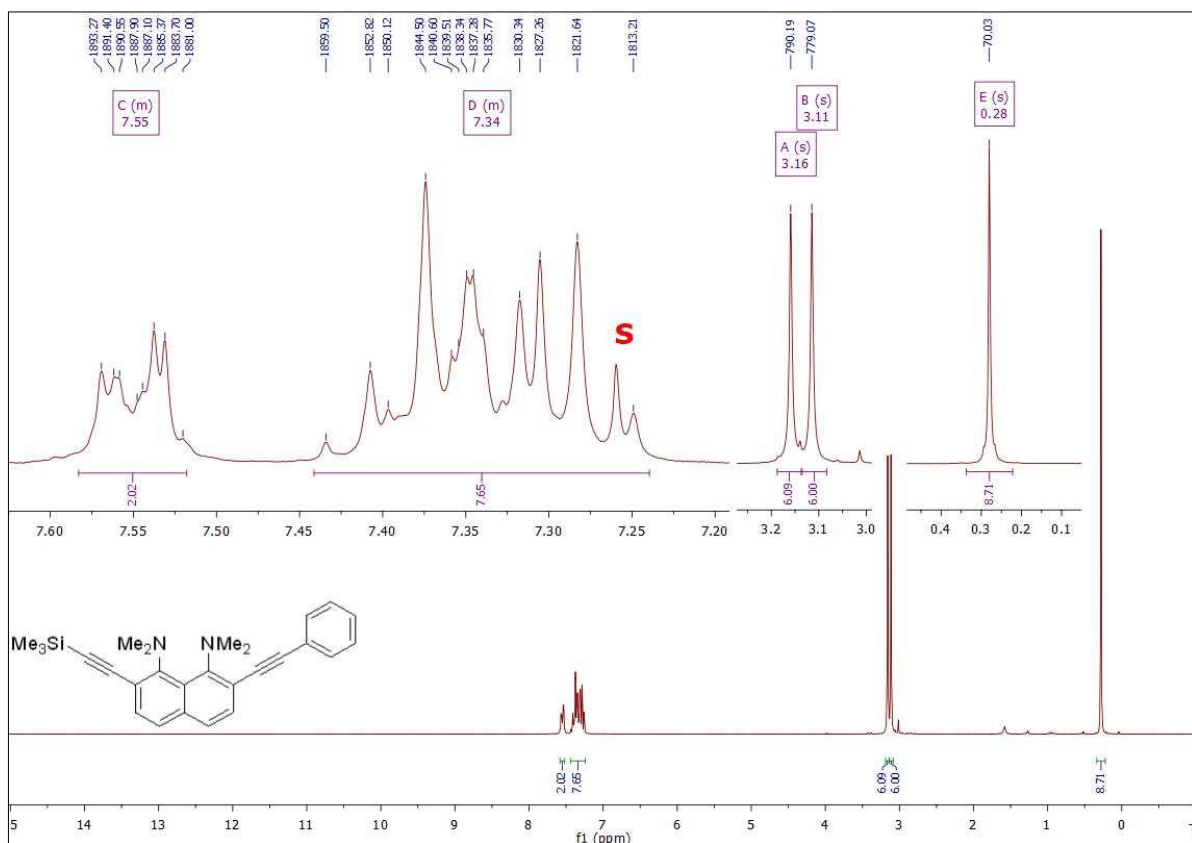

**Figure S19.**  $^1\text{H}$  NMR spectrum of compound **10a** (250 MHz,  $\text{CDCl}_3$ ).

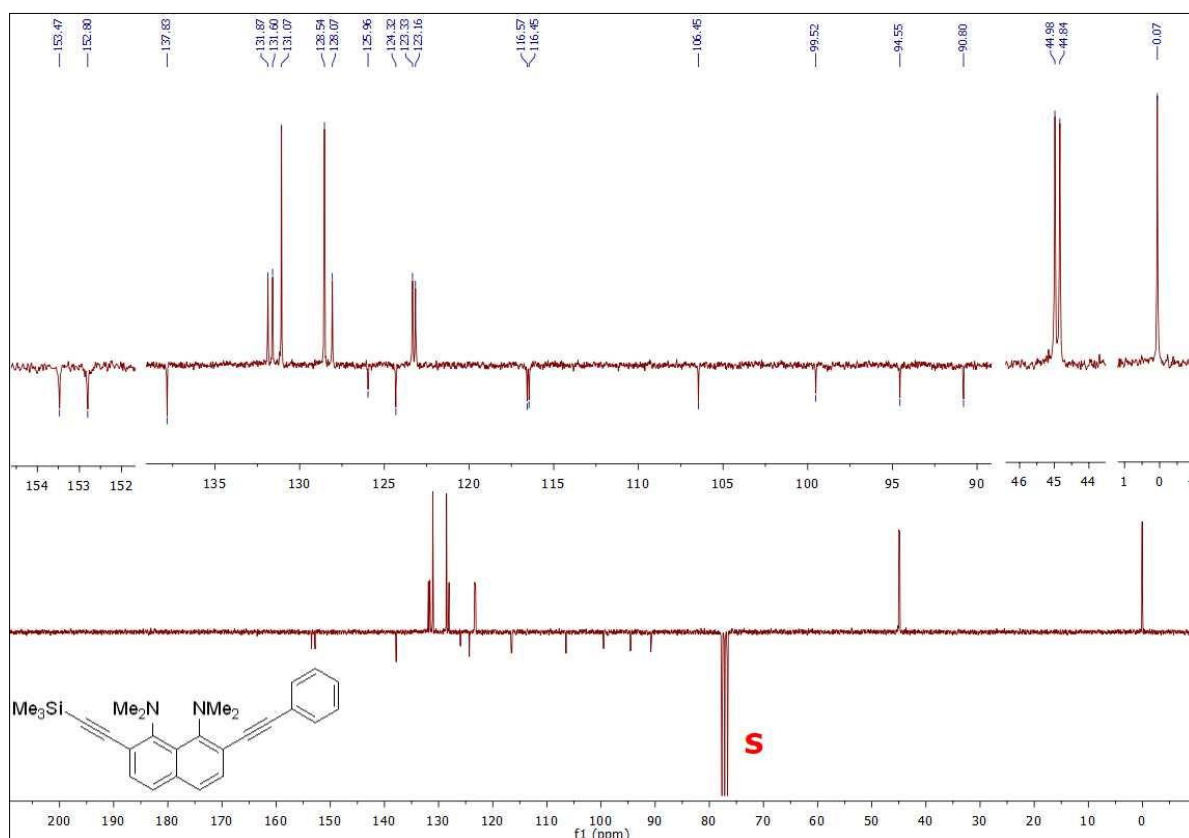

**Figure S20.**  $^{13}\text{C}\{^1\text{H}\}$  APT-NMR spectrum of compound **10a** (62.9 MHz,  $\text{CDCl}_3$ ).

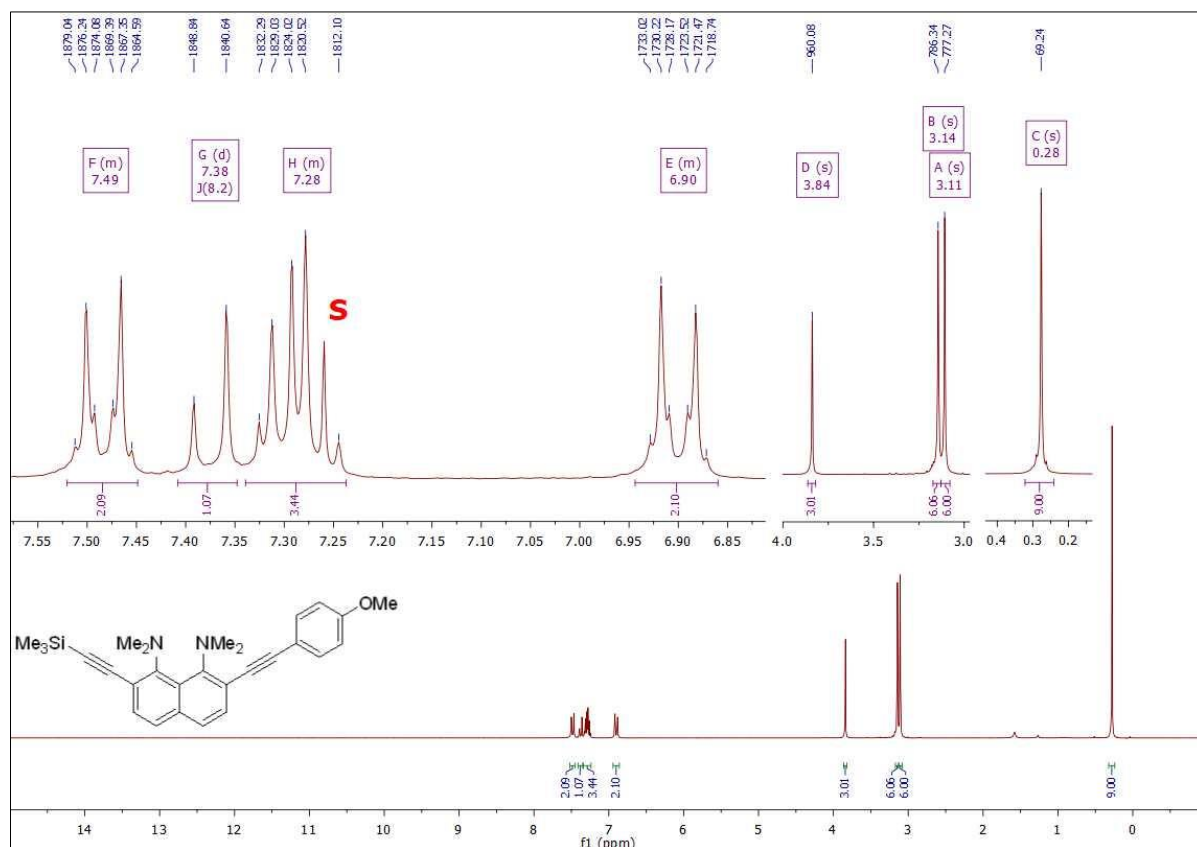

**Figure S21.** <sup>1</sup>H NMR spectrum of compound **10b** (250 MHz, CDCl<sub>3</sub>).

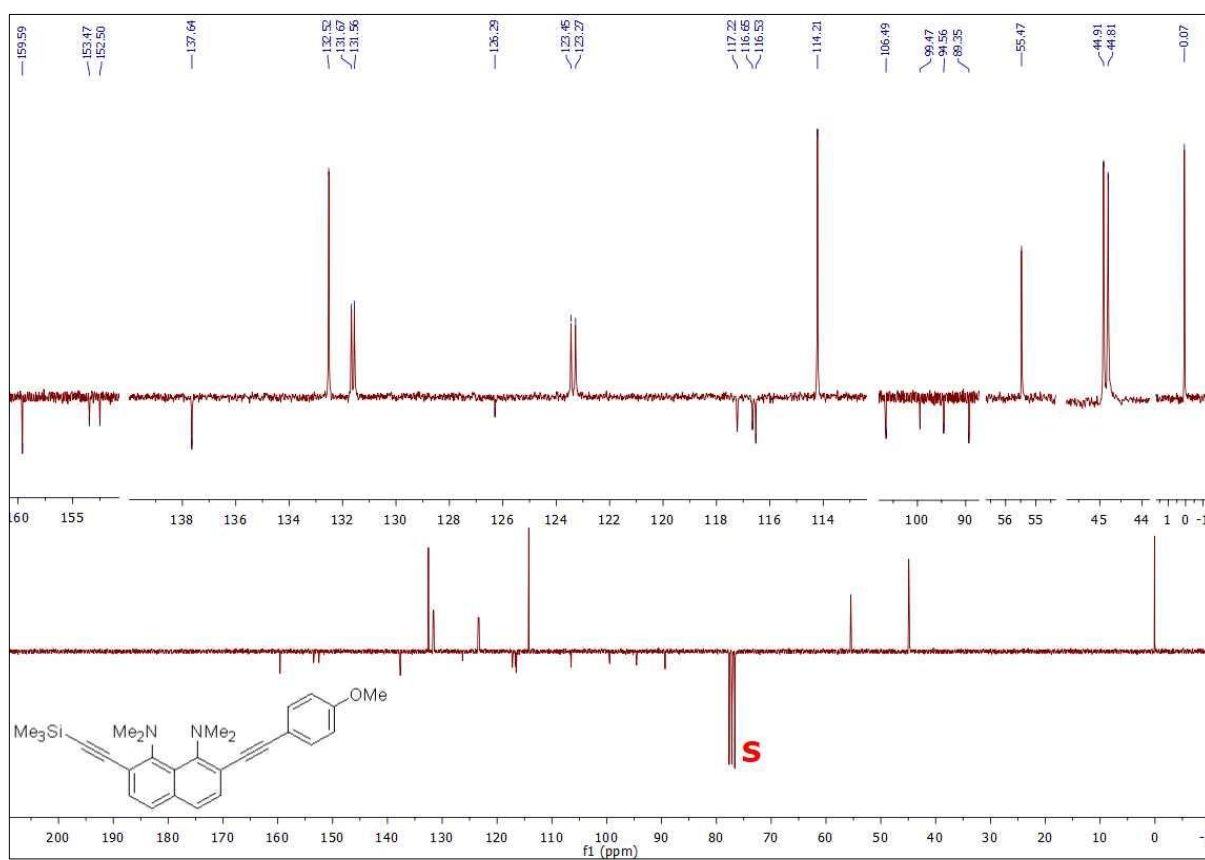

**Figure S22.** <sup>13</sup>C{<sup>1</sup>H} APT-NMR spectrum of compound **10b** (62.9 MHz, CDCl<sub>3</sub>).



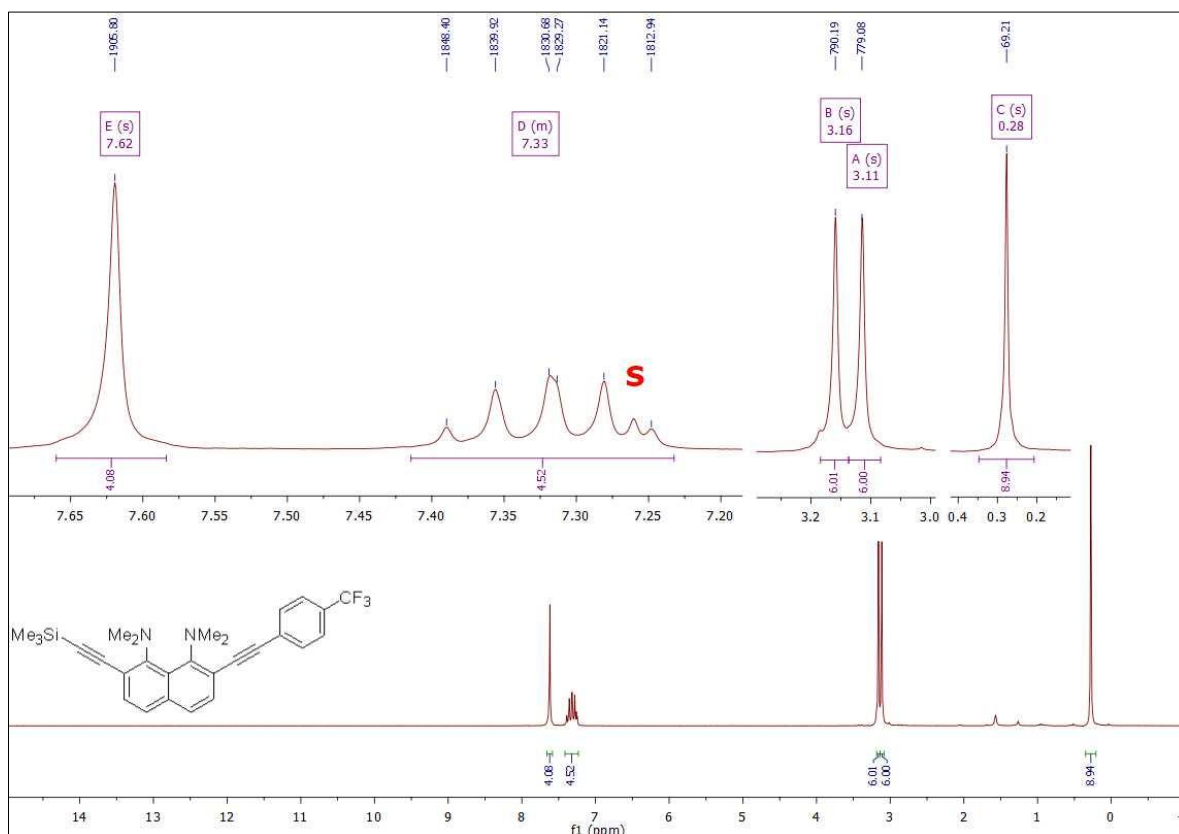

**Figure S23.** <sup>1</sup>H NMR spectrum of compound **10c** (250 MHz, CDCl<sub>3</sub>).

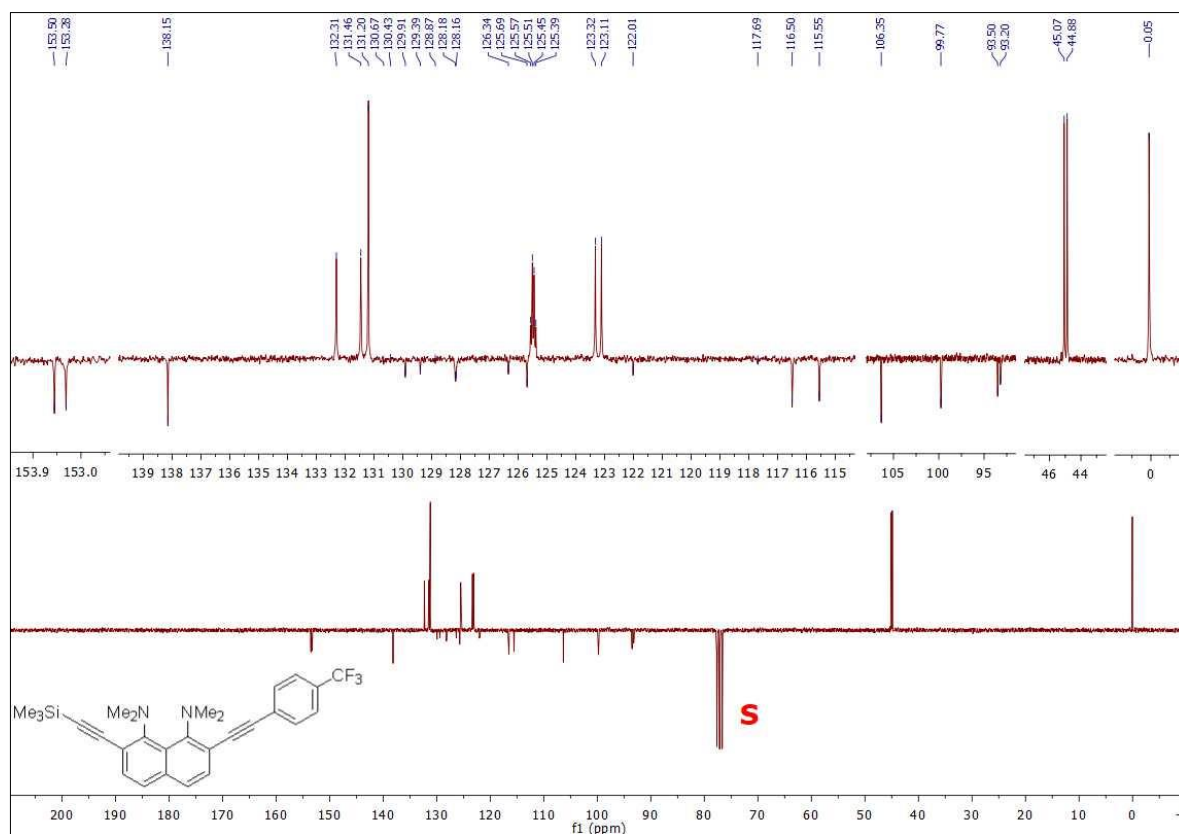

**Figure S24.** <sup>13</sup>C{<sup>1</sup>H} APT-NMR spectrum of compound **10c** (62.9 MHz, CDCl<sub>3</sub>).

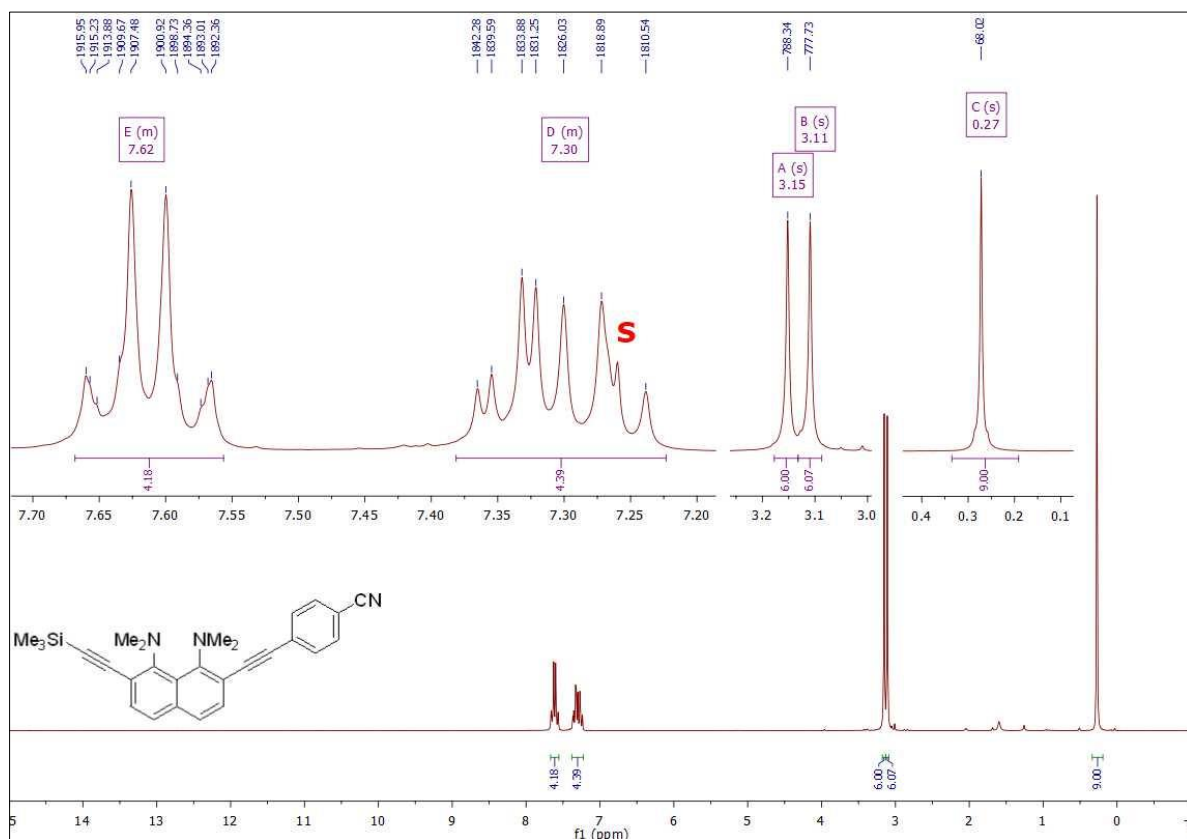

**Figure S25.**  $^1\text{H}$  NMR spectrum of compound **10d** (250 MHz,  $\text{CDCl}_3$ ).

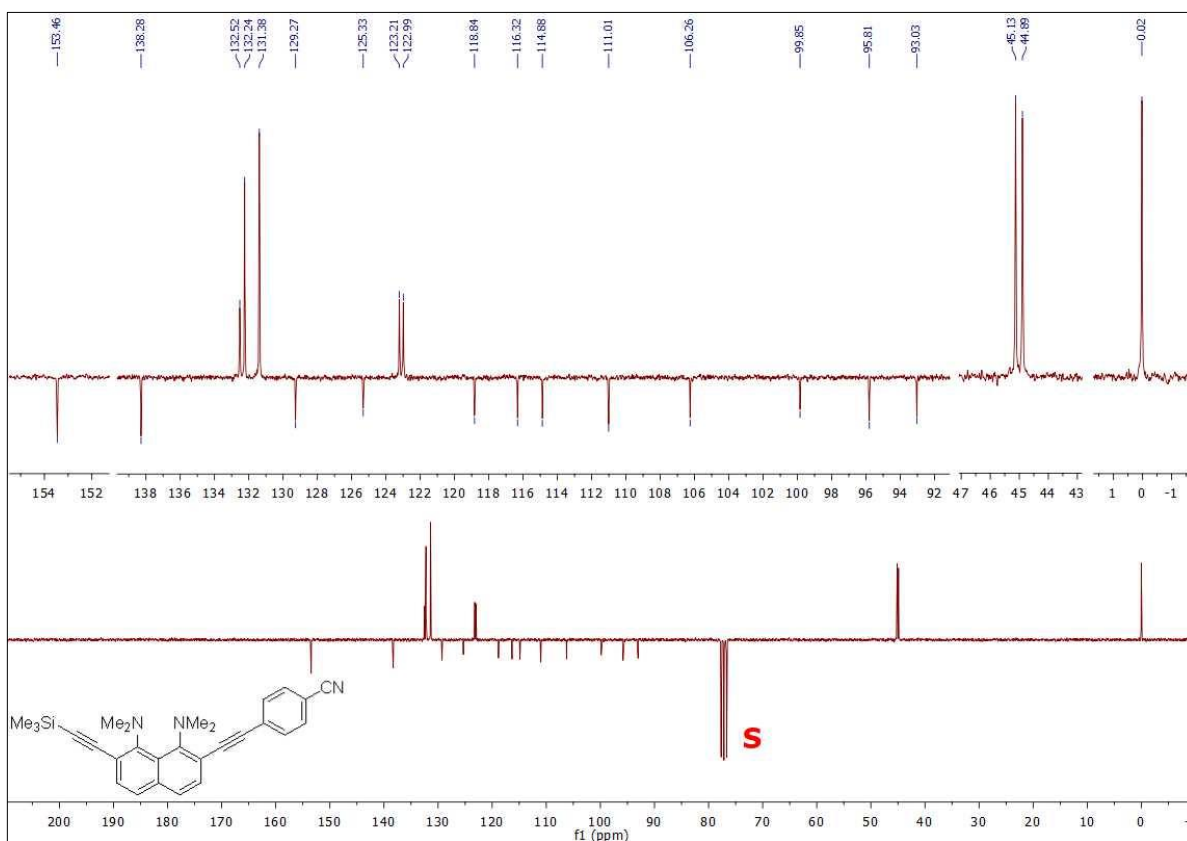

**Figure S26.**  $^{13}\text{C}\{^1\text{H}\}$  APT-NMR spectrum of compound **10d** (62.9 MHz,  $\text{CDCl}_3$ ).



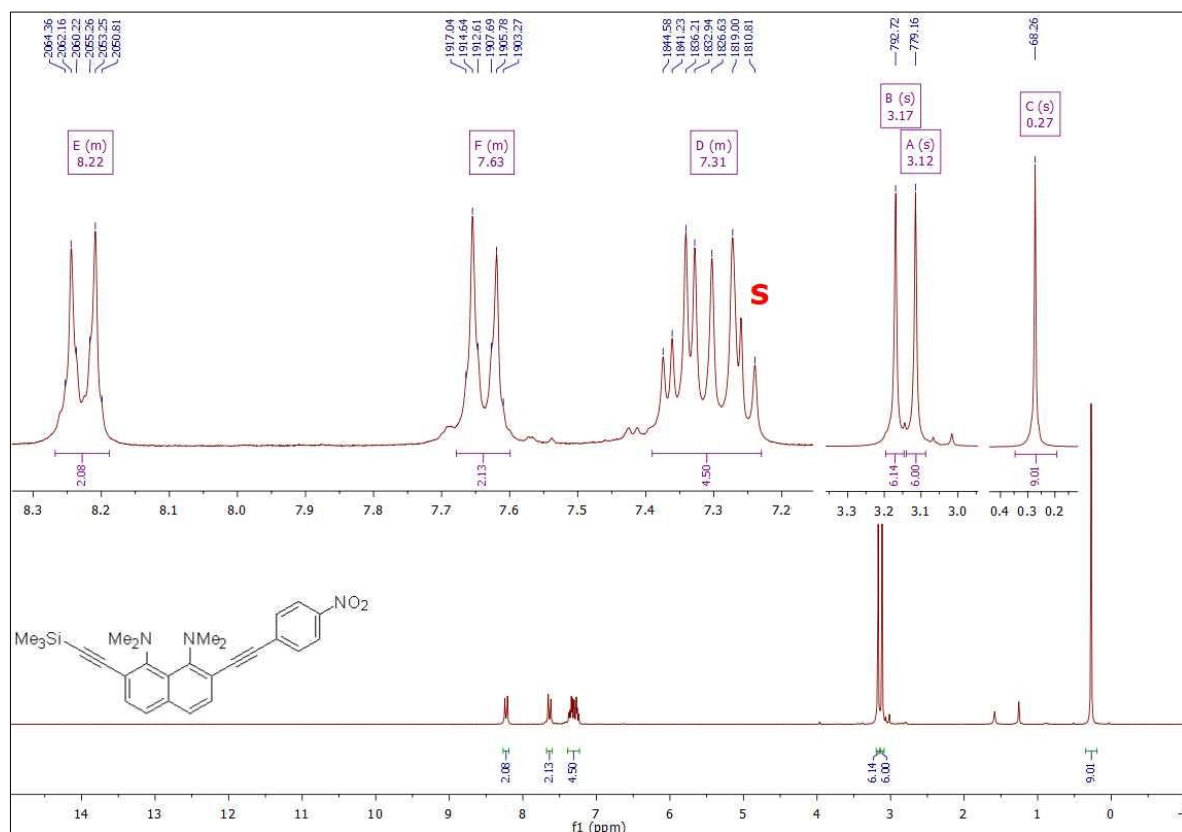

**Figure S27.** <sup>1</sup>H NMR spectrum of compound **10e** (250 MHz, CDCl<sub>3</sub>).

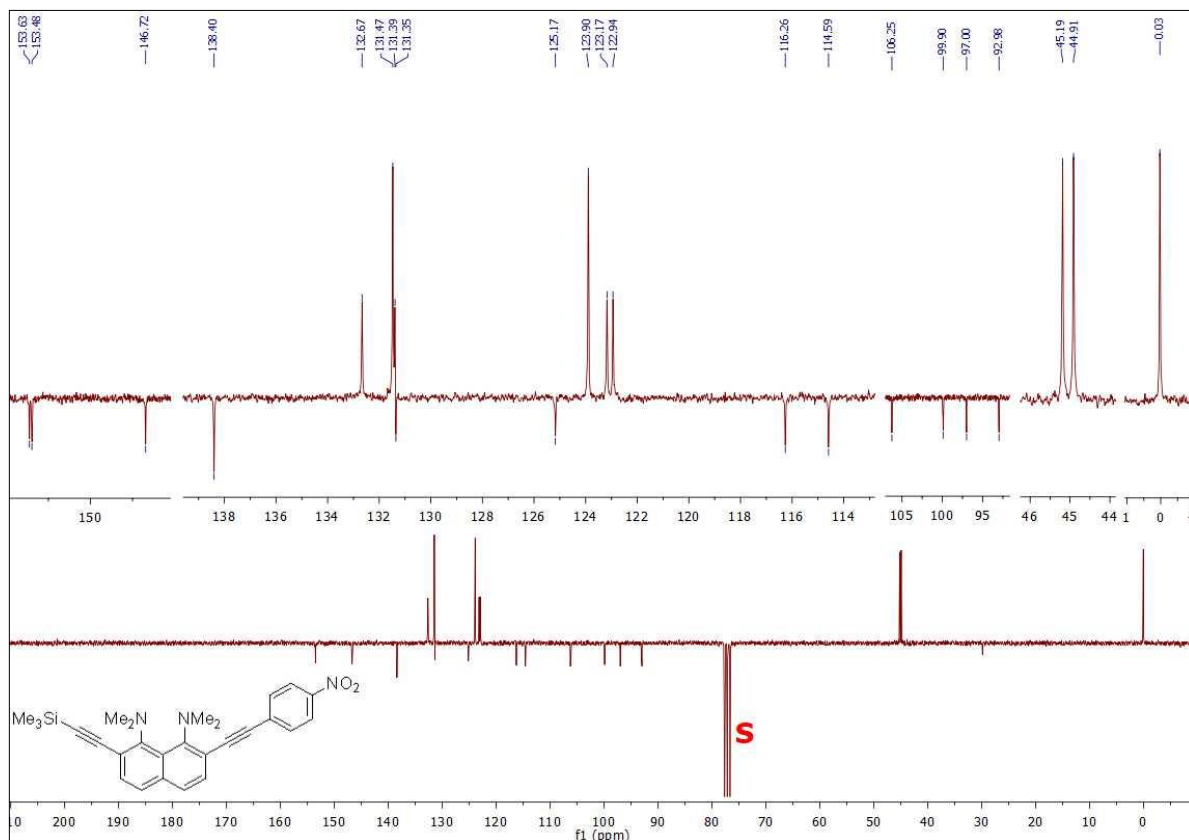

**Figure S28.** <sup>13</sup>C{<sup>1</sup>H} APT-NMR spectrum of compound **10e** (62.9 MHz, CDCl<sub>3</sub>).

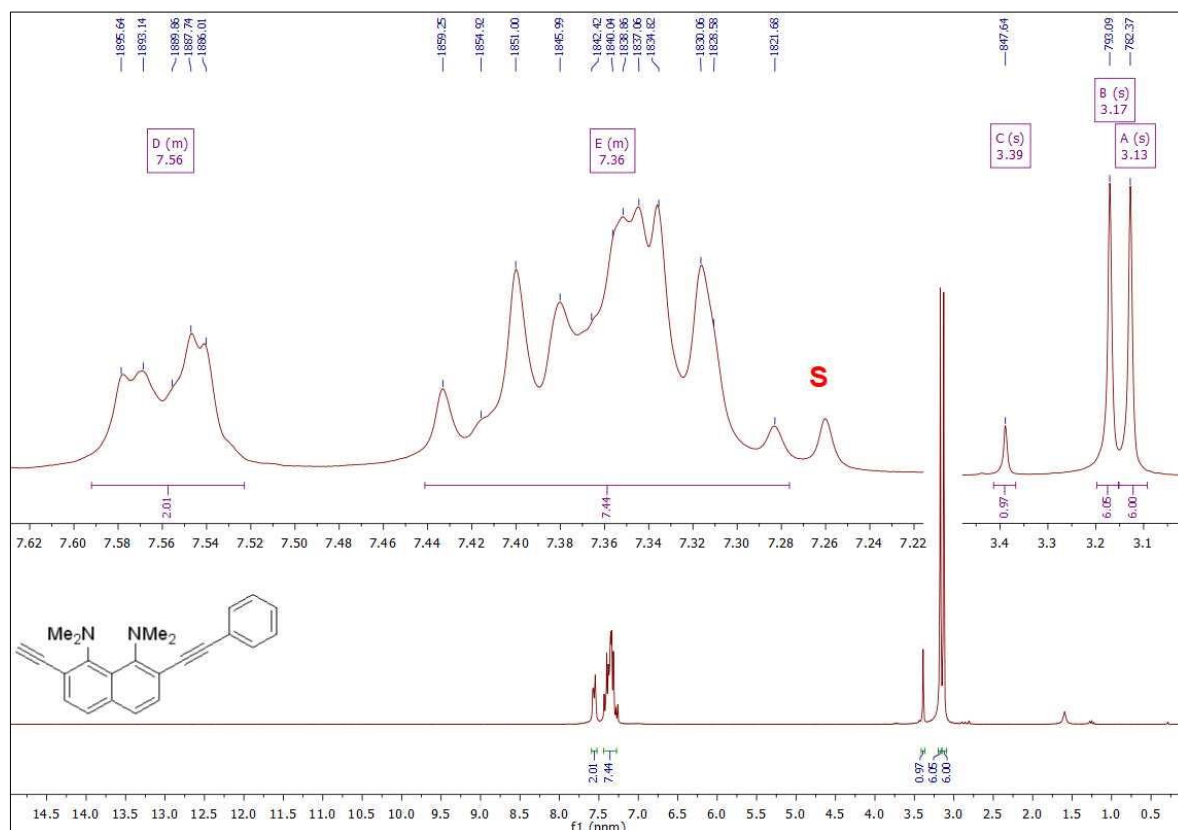

**Figure S29.**  $^1\text{H}$  NMR spectrum of compound **6a** (250 MHz,  $\text{CDCl}_3$ ).

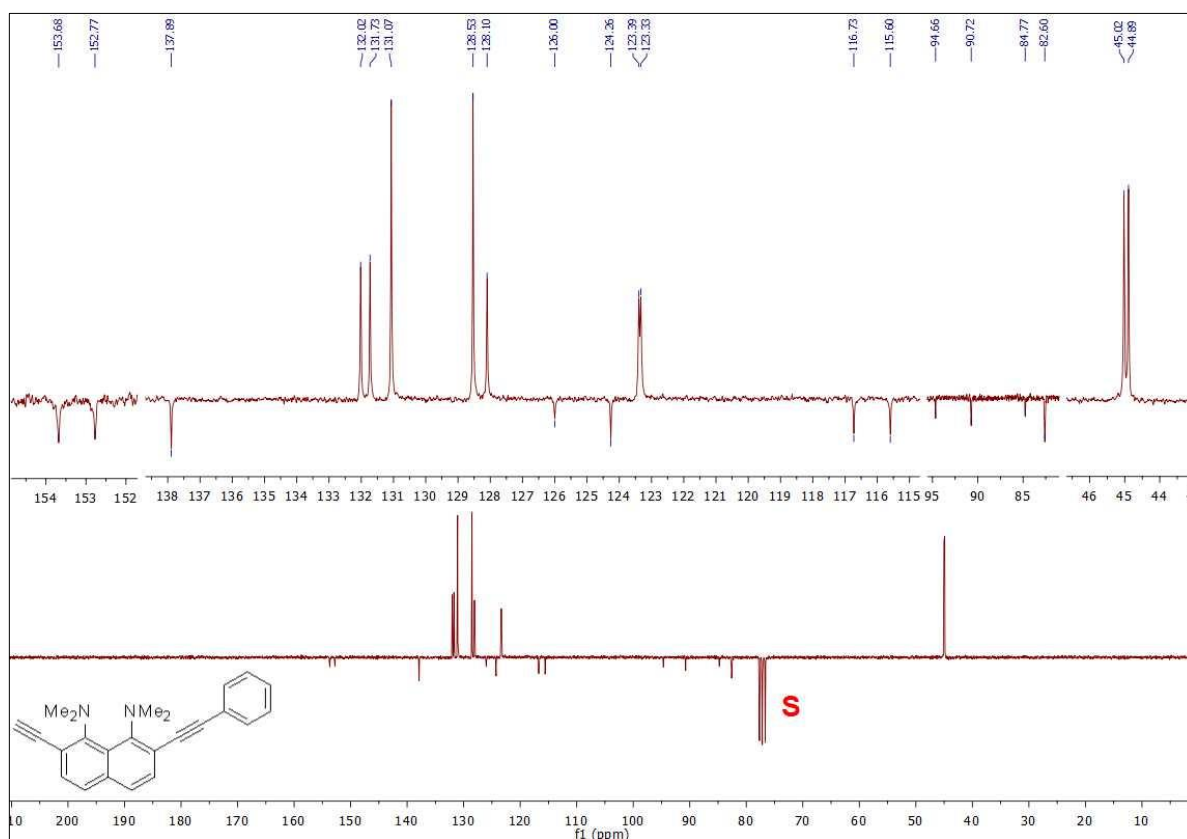

**Figure S30.**  $^{13}\text{C}\{^1\text{H}\}$  APT-NMR spectrum of compound **6a** (62.9 MHz,  $\text{CDCl}_3$ ).

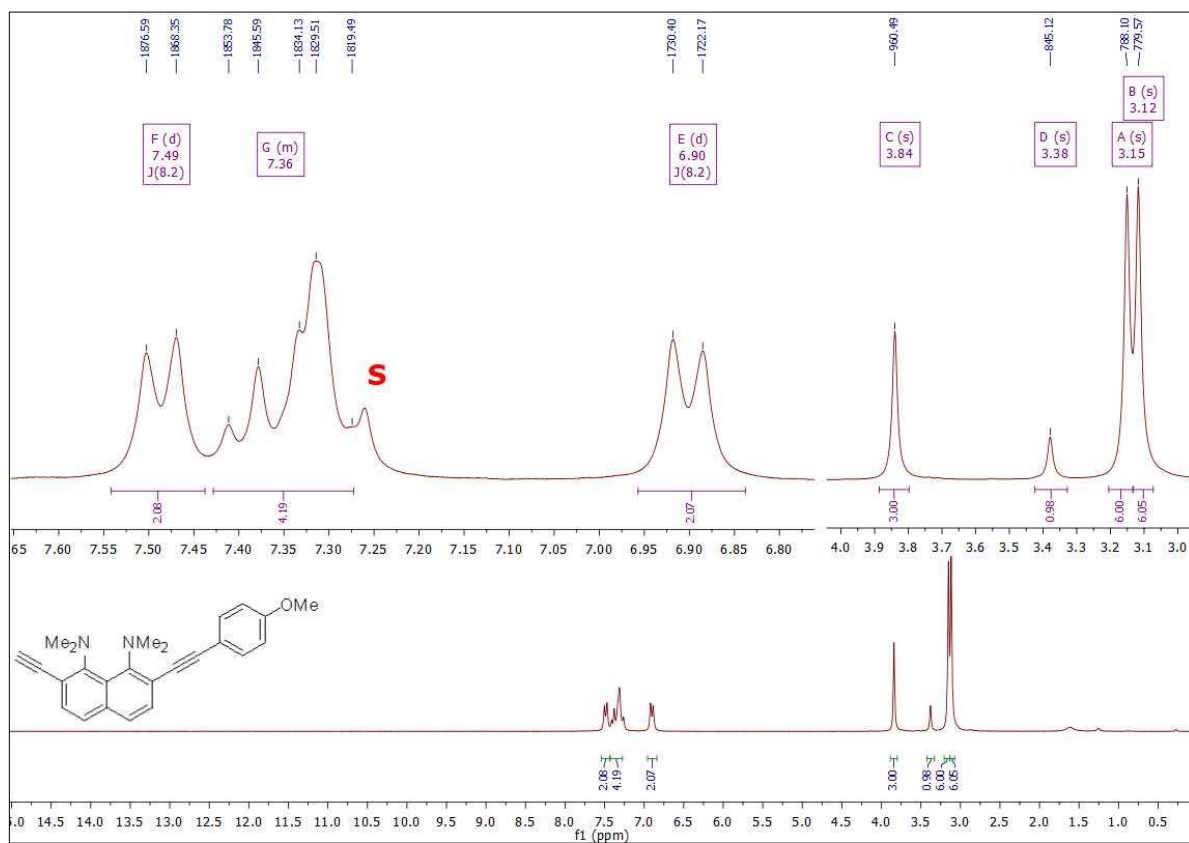

**Figure S31.** <sup>1</sup>H NMR spectrum of compound **6b** (250 MHz, CDCl<sub>3</sub>).

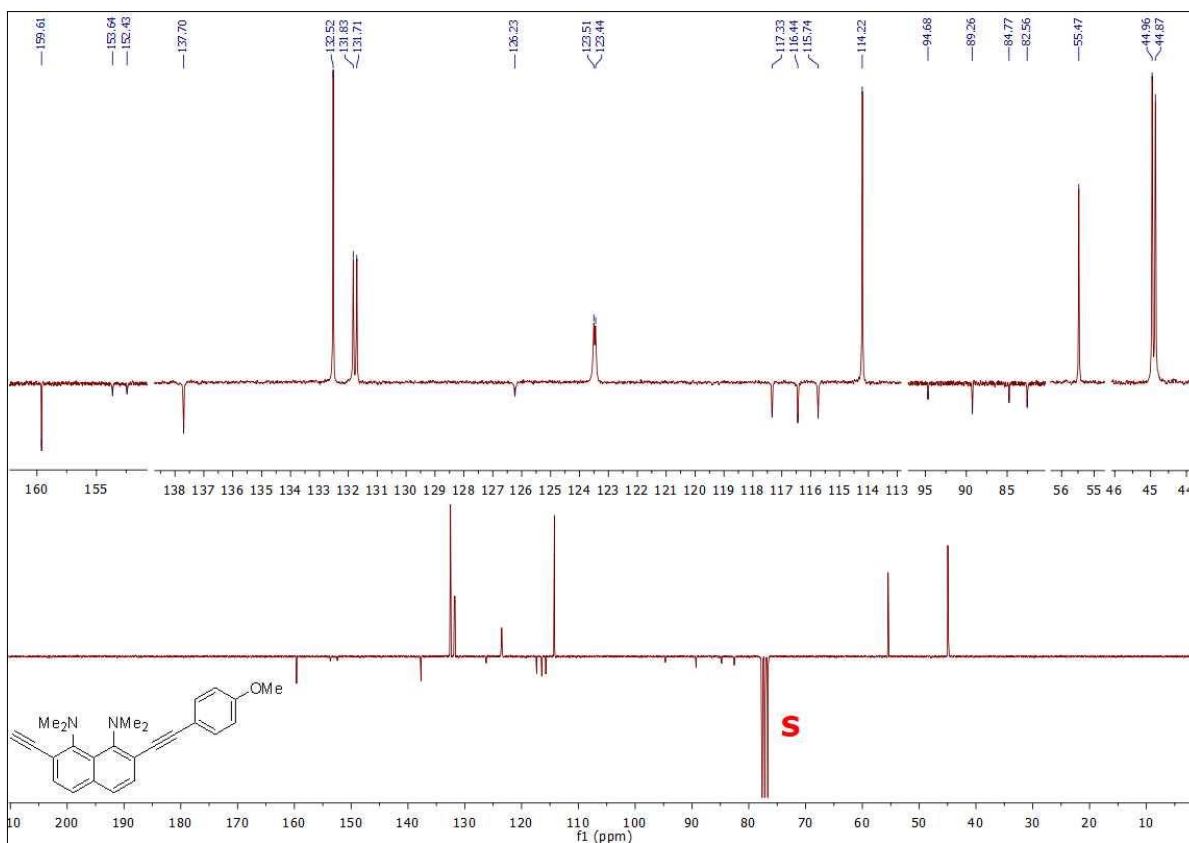

**Figure S32.** <sup>13</sup>C{<sup>1</sup>H} APT-NMR spectrum of compound **6b** (62.9 MHz, CDCl<sub>3</sub>).

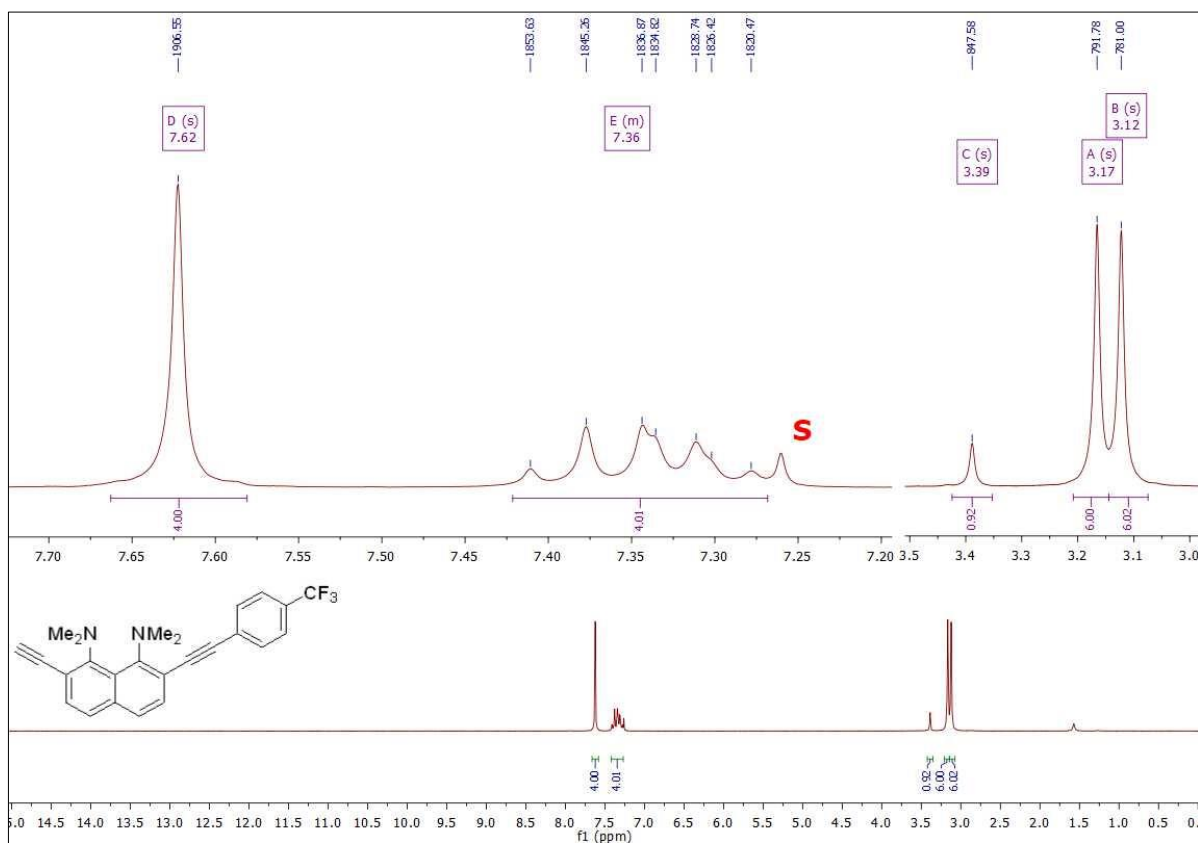

**Figure S33.**  $^1\text{H}$  NMR spectrum of compound **6c** (250 MHz,  $\text{CDCl}_3$ ).

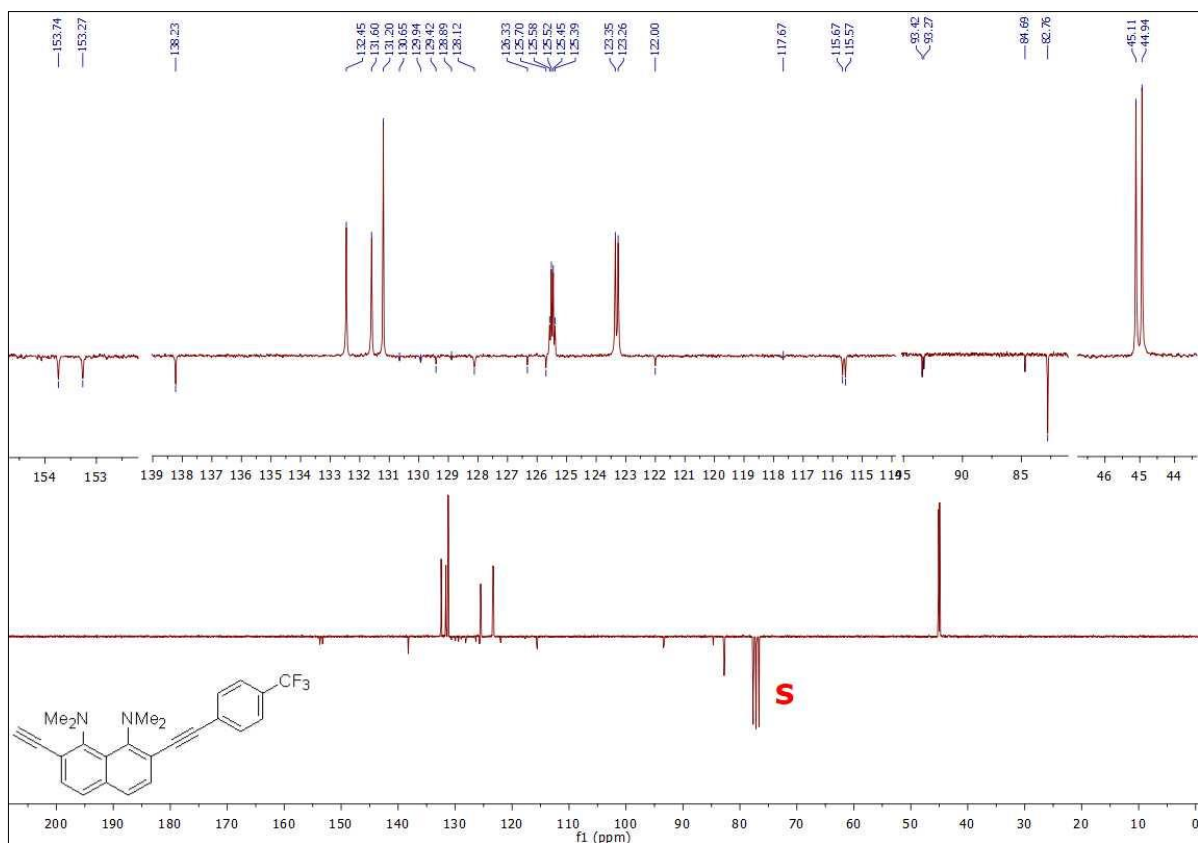

**Figure S34.**  $^{13}\text{C}\{^1\text{H}\}$  APT-NMR spectrum of compound **6c** (62.9 MHz,  $\text{CDCl}_3$ ).

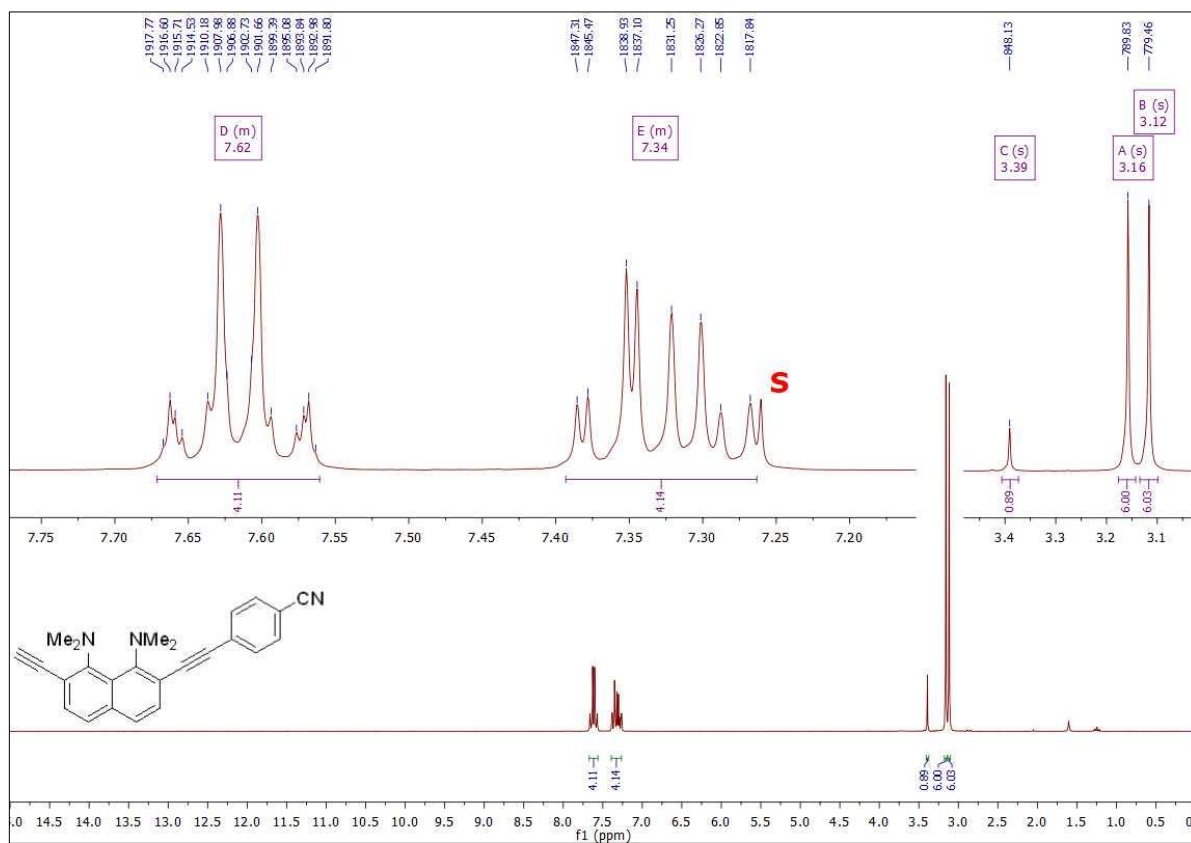

**Figure S35.**  $^1\text{H}$  NMR spectrum of compound **6d** (250 MHz,  $\text{CDCl}_3$ ).

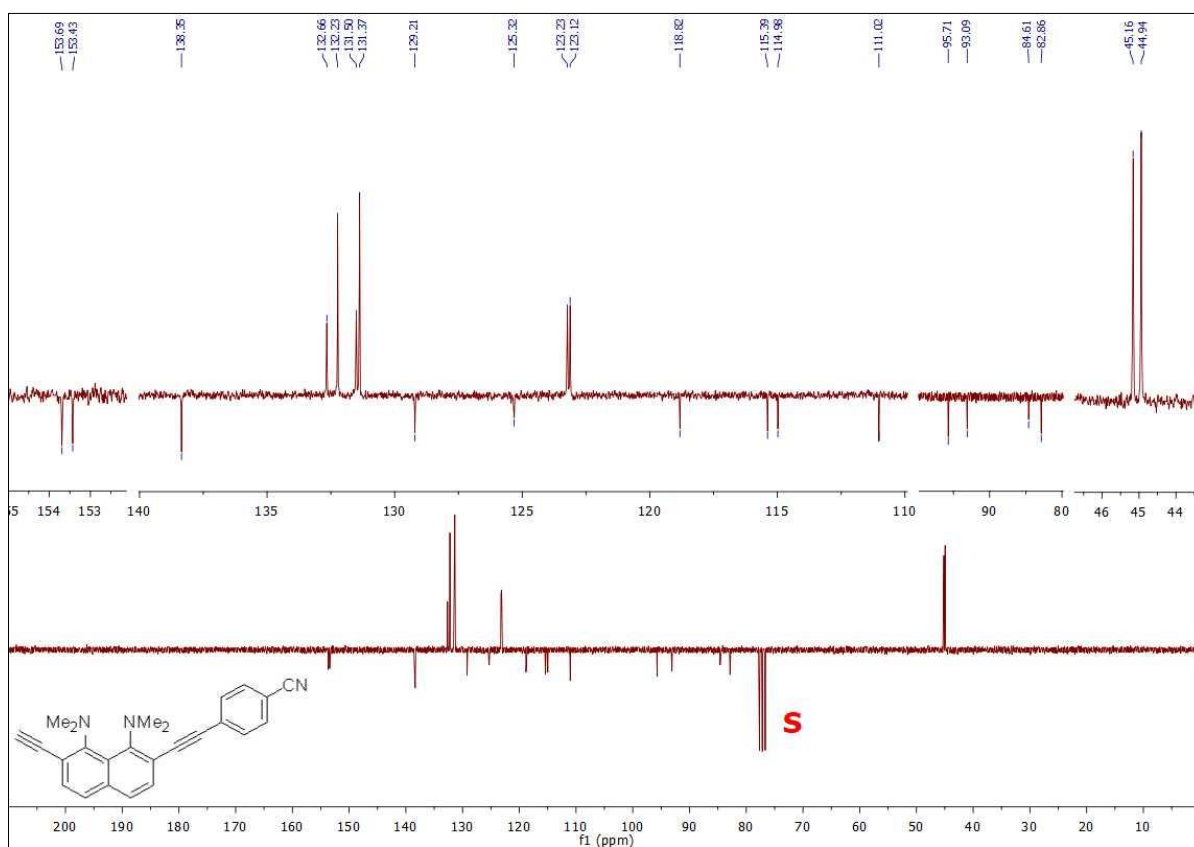

**Figure S36.**  $^{13}\text{C}\{^1\text{H}\}$  APT-NMR spectrum of compound **6d** (62.9 MHz,  $\text{CDCl}_3$ ).

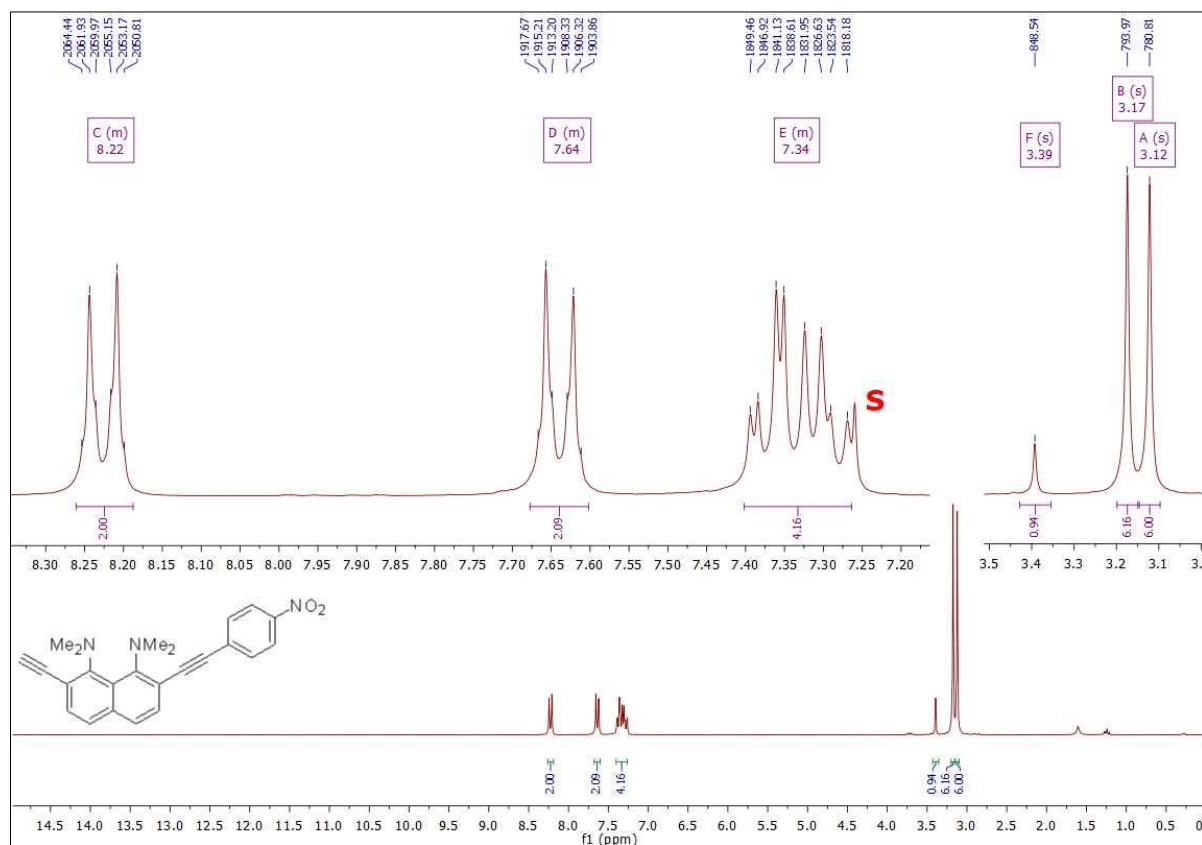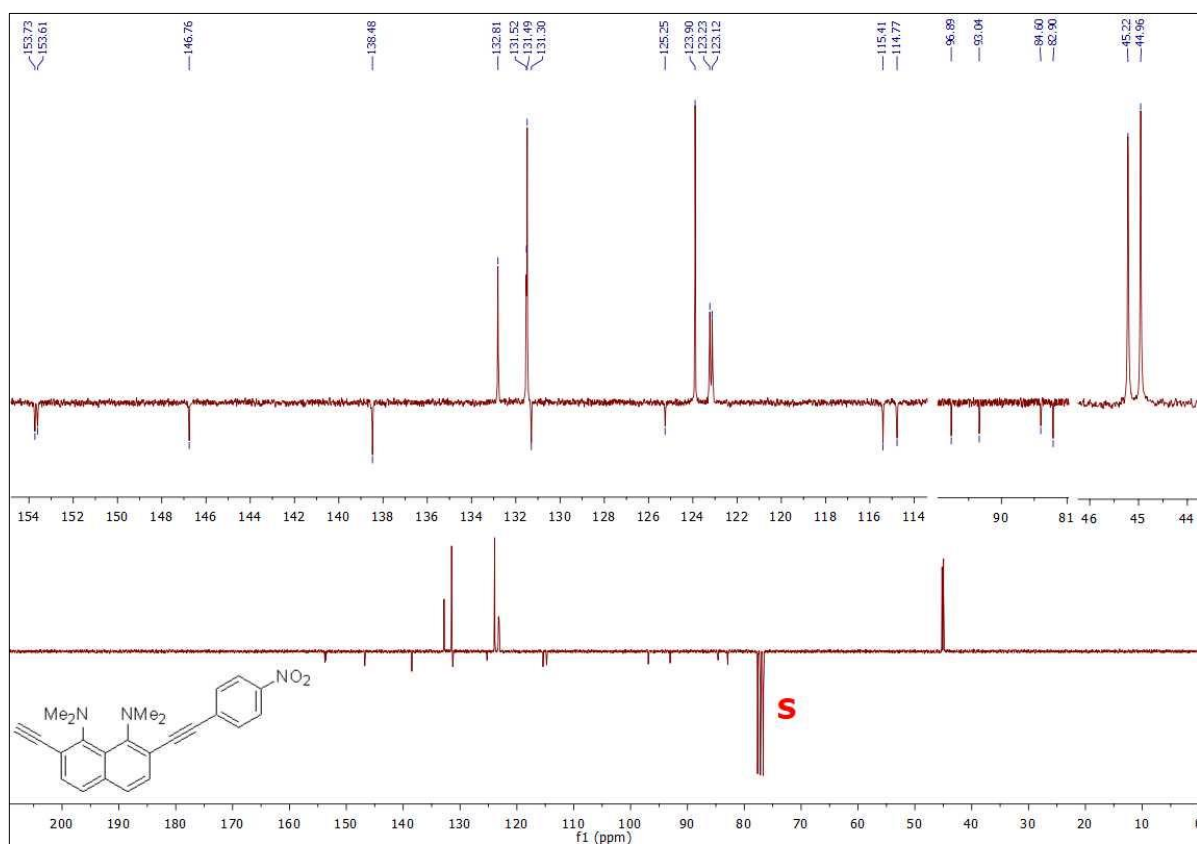



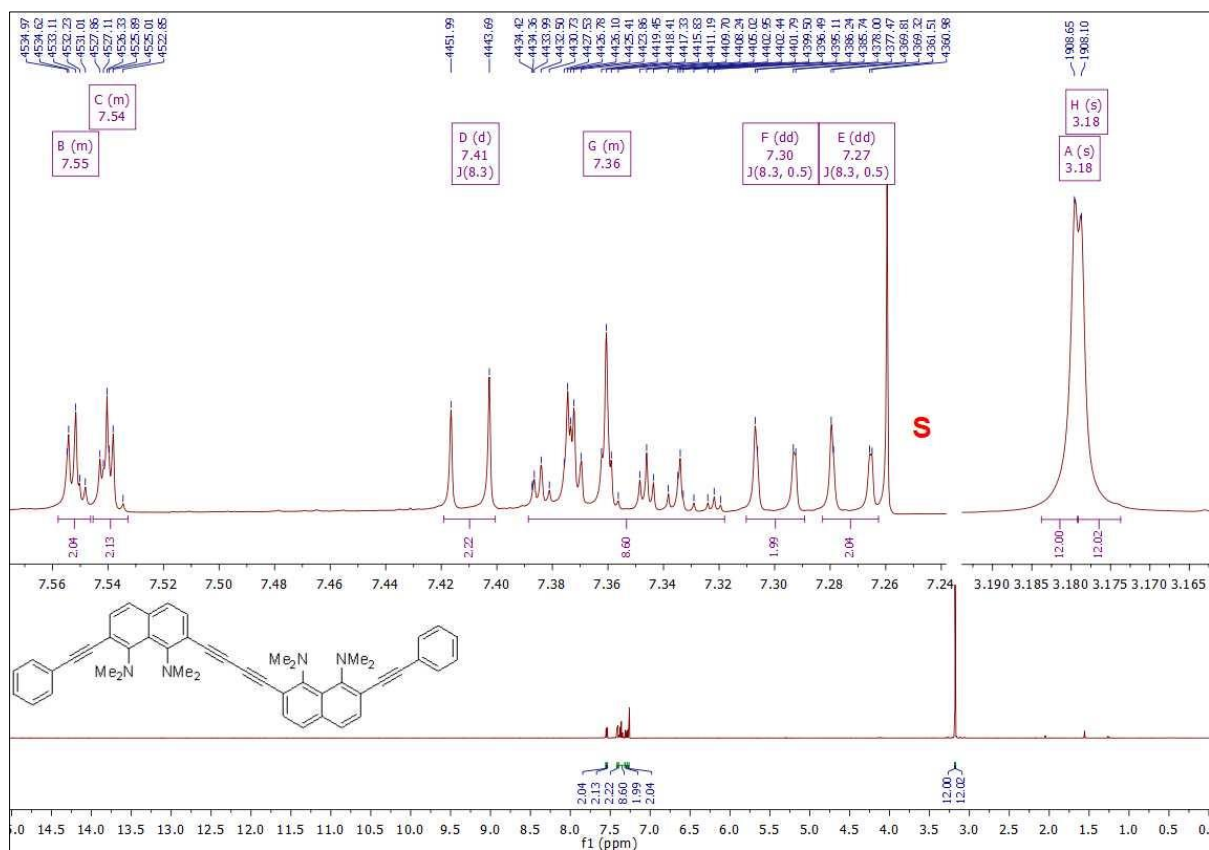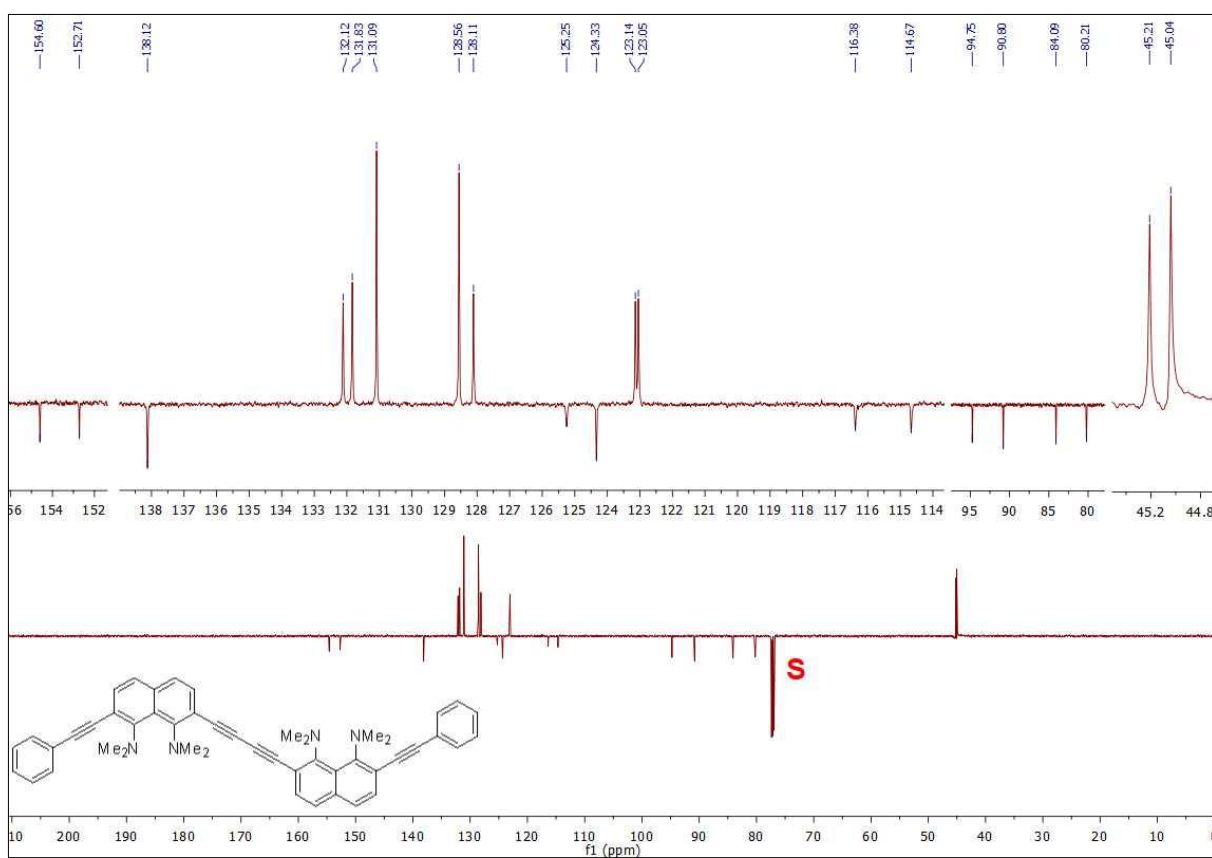

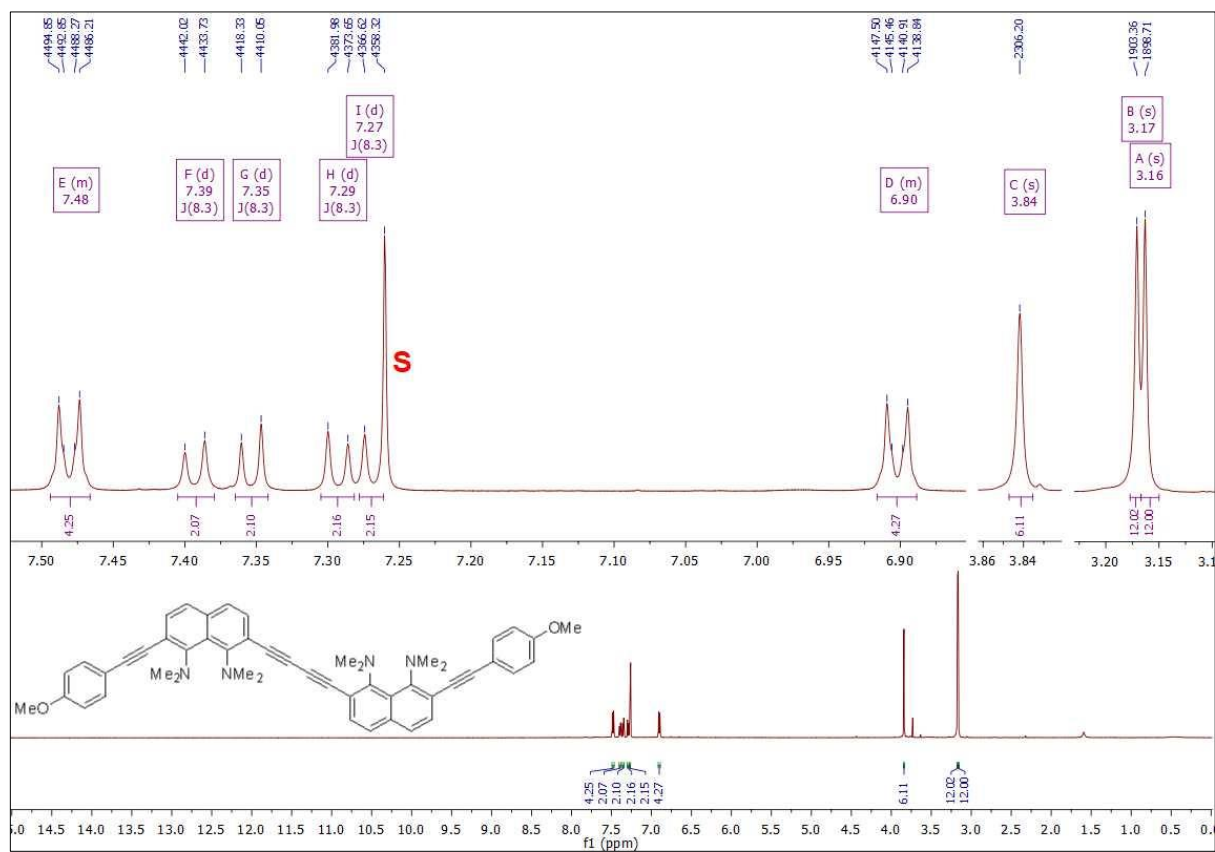

**Figure S41.**  $^1\text{H}$  NMR spectrum of compound **5b** (600 MHz,  $\text{CDCl}_3$ ).

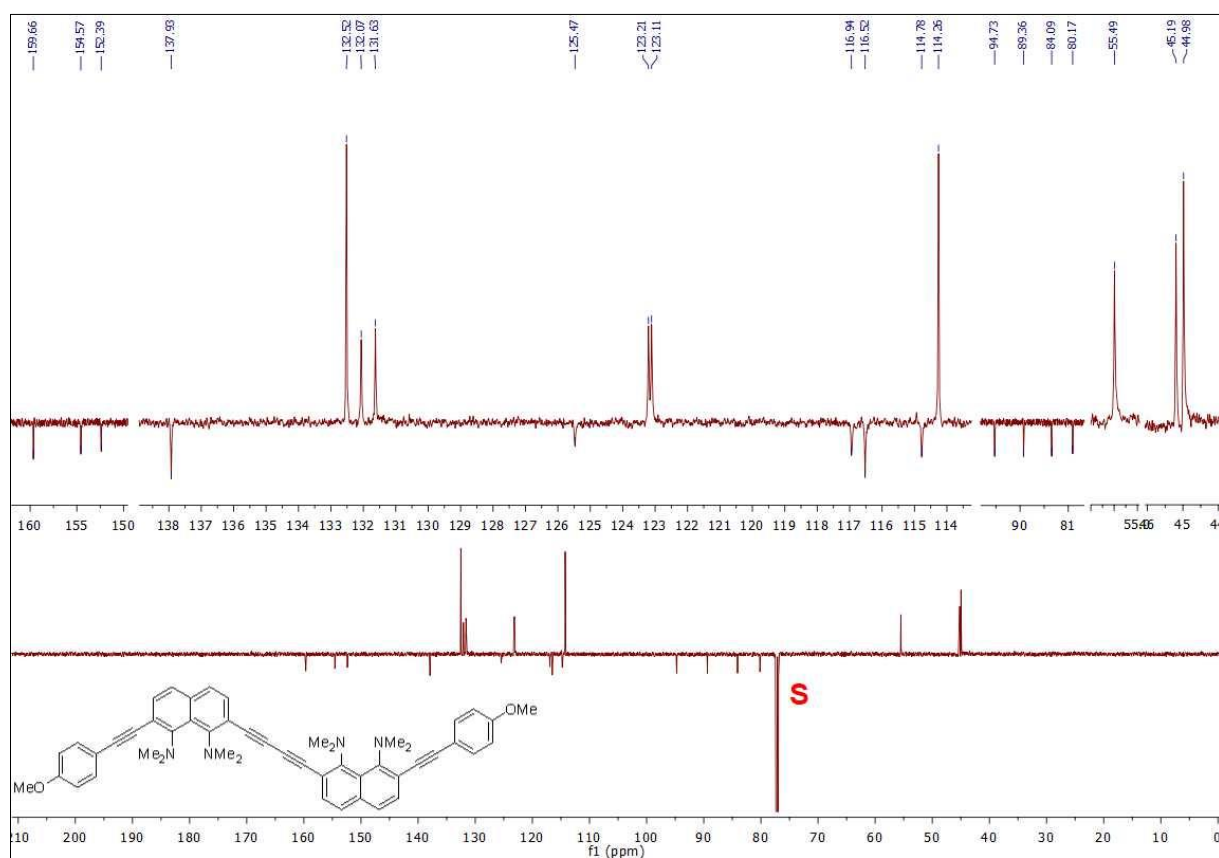

**Figure S42.**  $^{13}\text{C}\{^1\text{H}\}$  APT-NMR spectrum of compound **5b** (150 MHz,  $\text{CDCl}_3$ ).



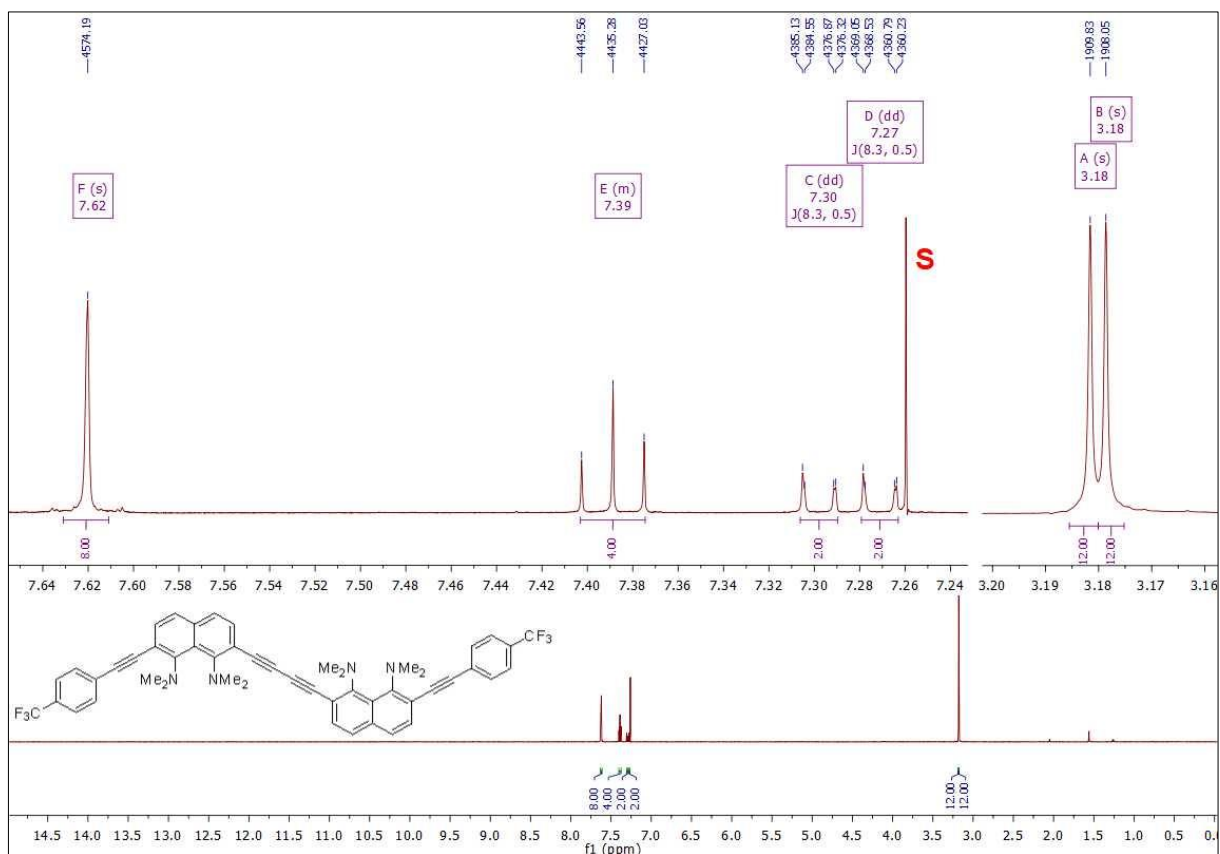

**Figure S43.**  $^1\text{H}$  NMR spectrum of compound **5c** (600 MHz,  $\text{CDCl}_3$ ).

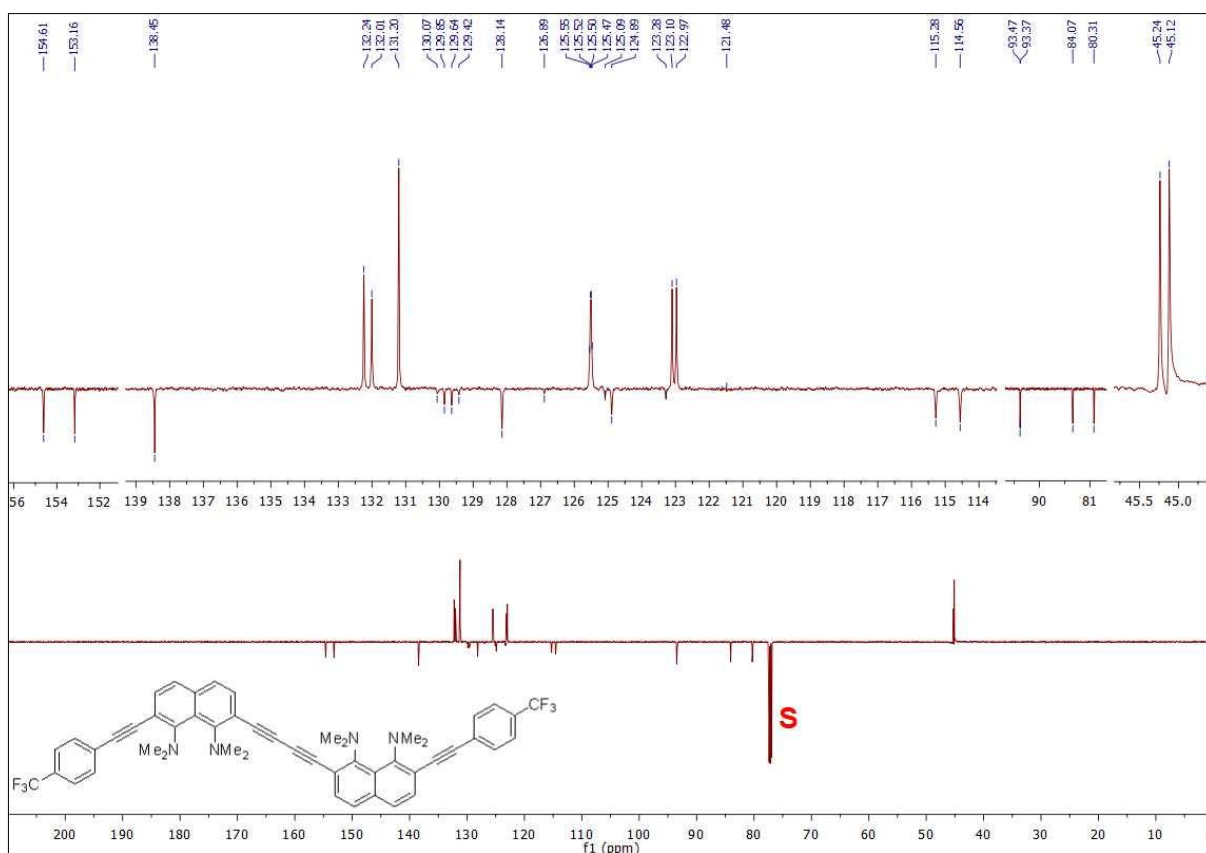

**Figure S44.**  $^{13}\text{C}\{^1\text{H}\}$  APT-NMR spectrum of compound **5c** (150 MHz,  $\text{CDCl}_3$ ).

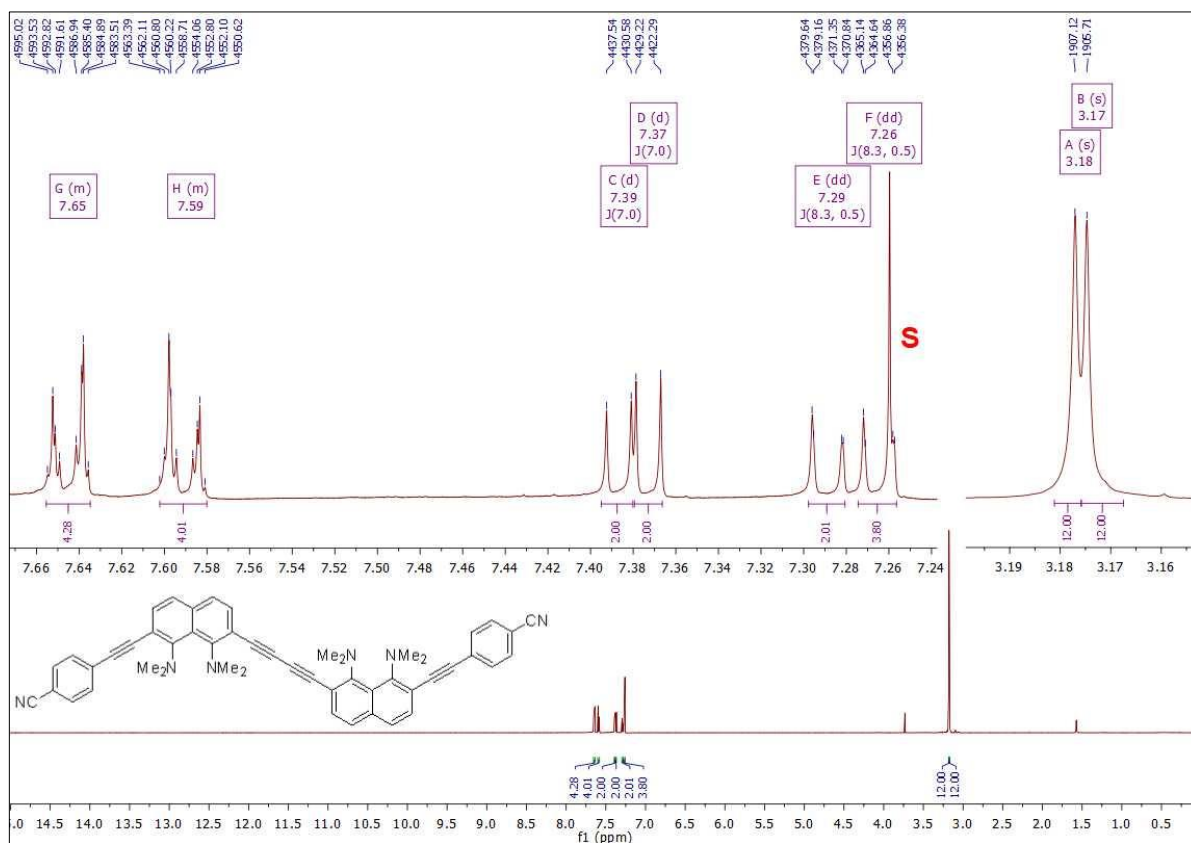

**Figure S45.**  $^1\text{H}$  NMR spectrum of compound **5d** (600 MHz,  $\text{CDCl}_3$ ).

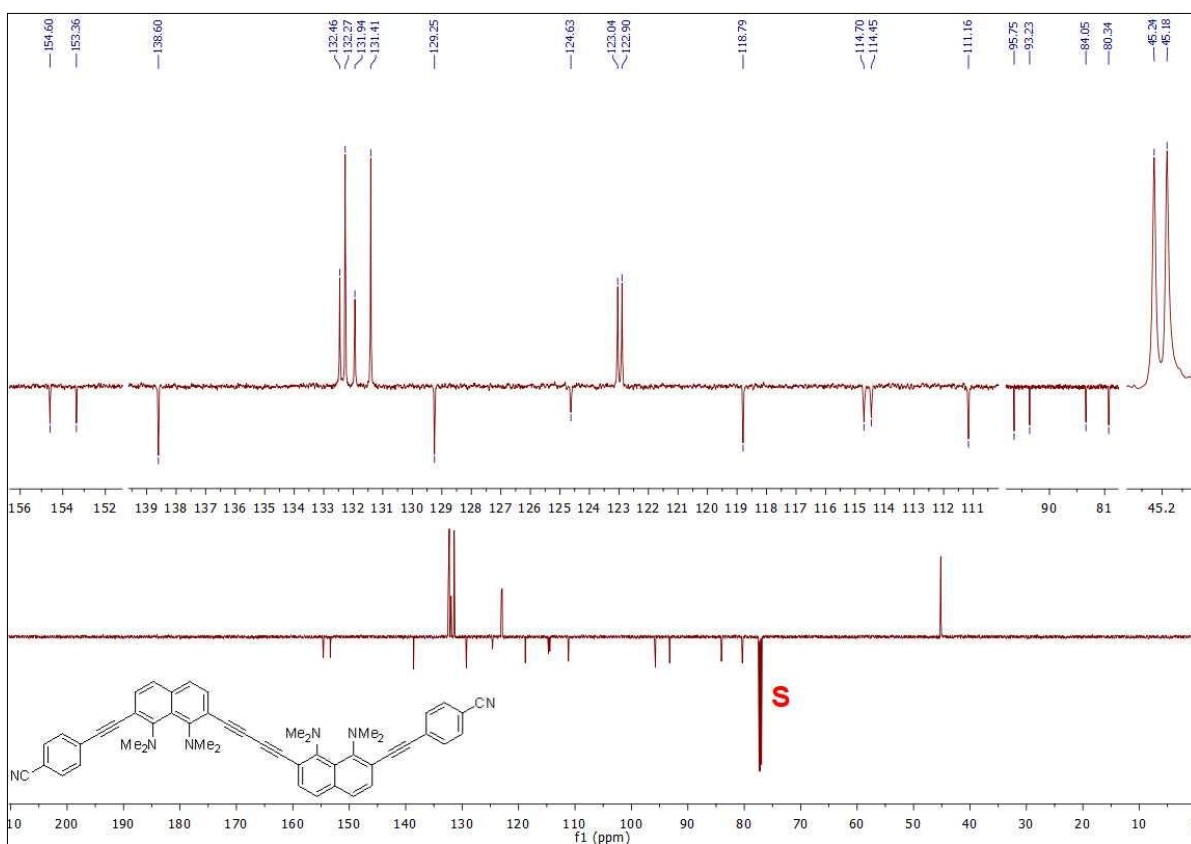

**Figure S46.**  $^{13}\text{C}\{^1\text{H}\}$  APT-NMR spectrum of compound **5d** (150 MHz,  $\text{CDCl}_3$ ).

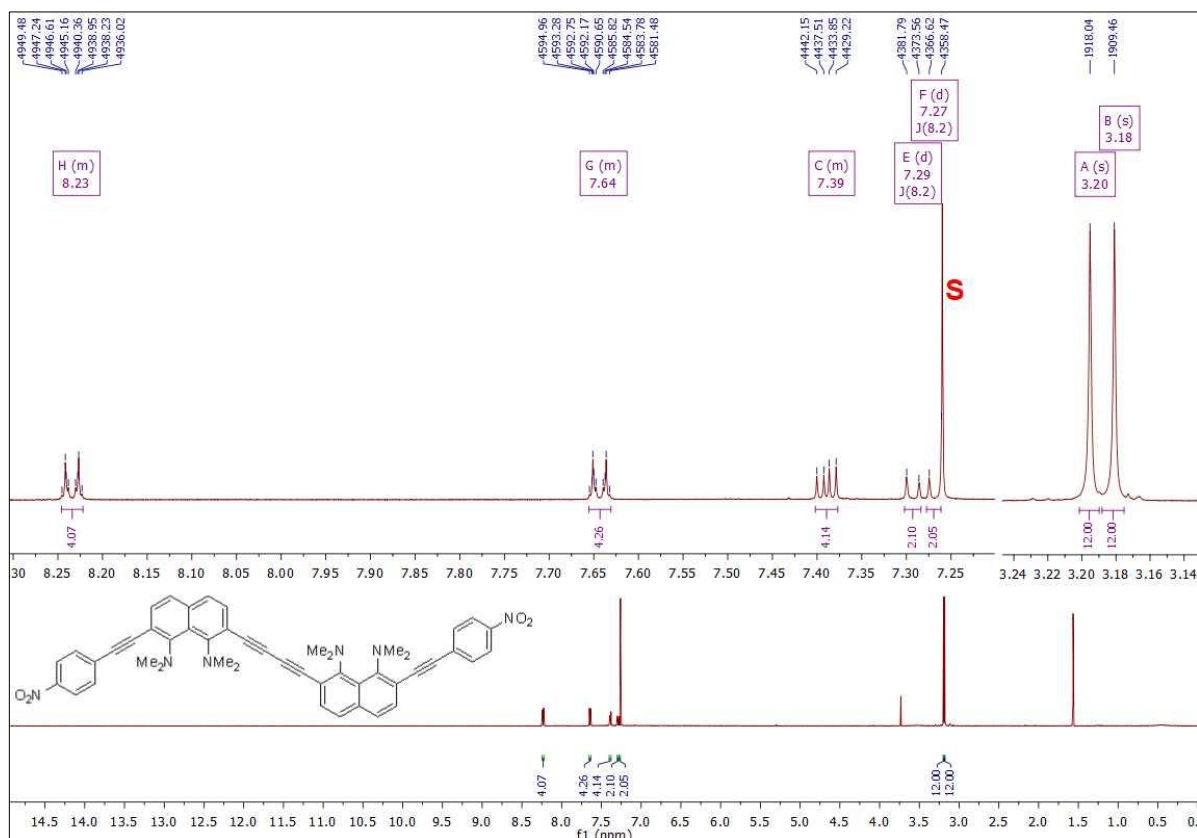

**Figure S47.**  $^1\text{H}$  NMR spectrum of compound **5e** (600 MHz,  $\text{CDCl}_3$ ).

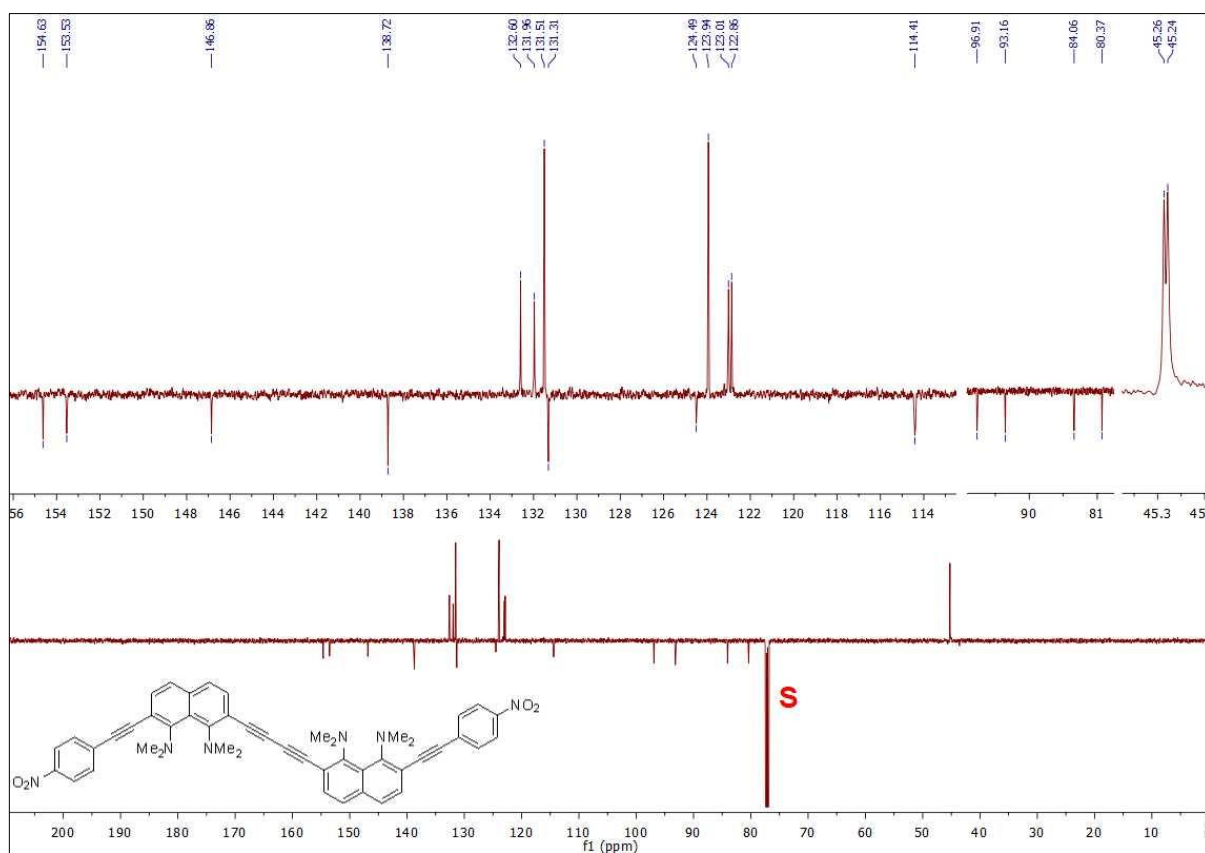

**Figure S48.**  $^{13}\text{C}\{^1\text{H}\}$  APT-NMR spectrum of compound **5e** (150 MHz,  $\text{CDCl}_3$ ).

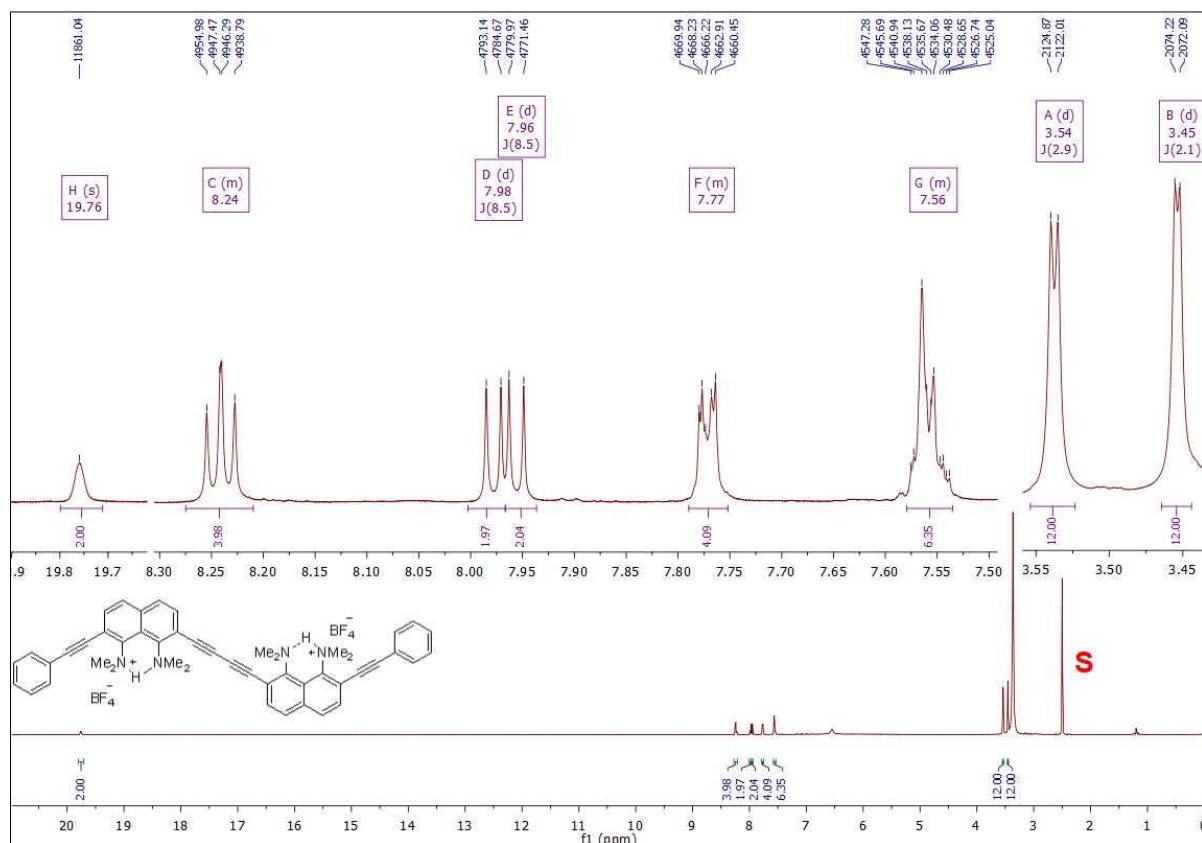

**Figure S49.** <sup>1</sup>H NMR spectrum of compound **11a** (600 MHz, DMSO-d<sub>6</sub>).

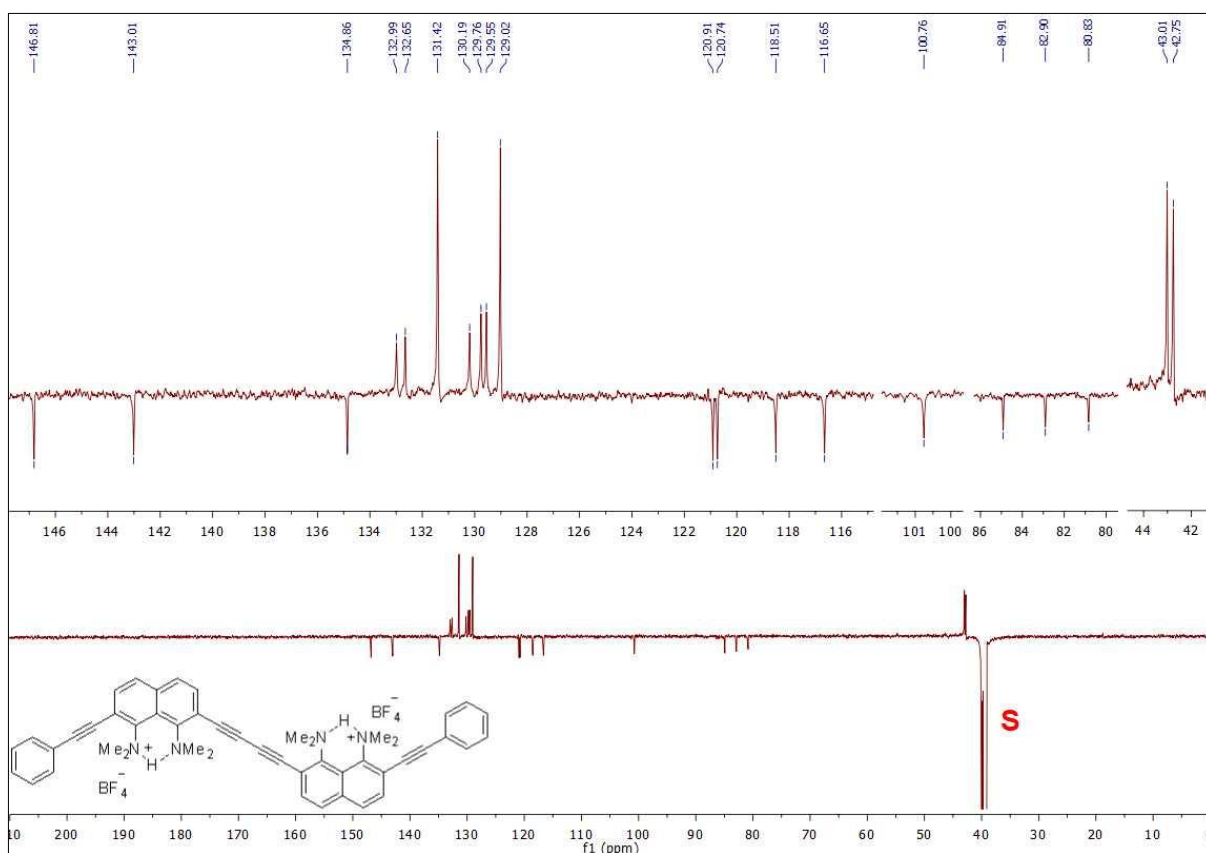

**Figure S50.** <sup>13</sup>C{<sup>1</sup>H} APT-NMR spectrum of compound **11a** (150 MHz, DMSO-d<sub>6</sub>).

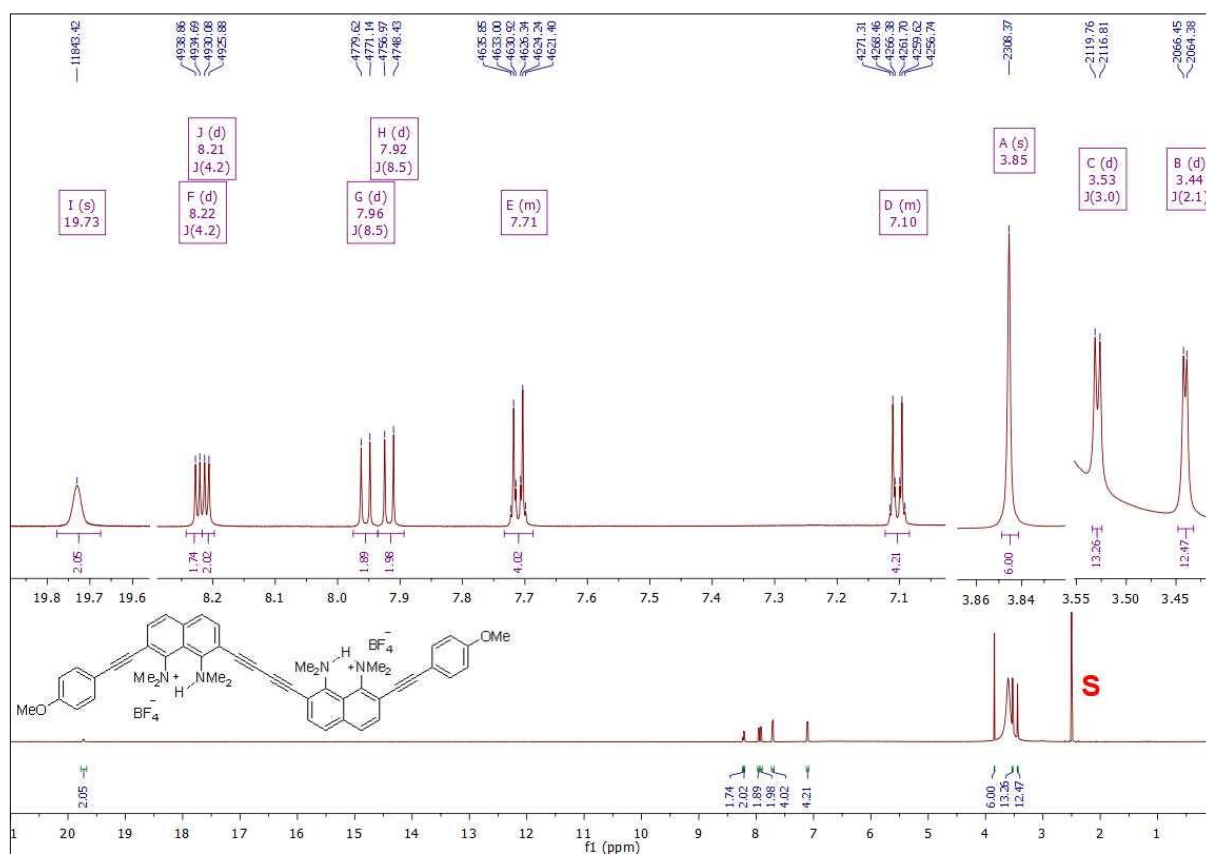

**Figure S51.** <sup>1</sup>H NMR spectrum of compound **11b** (600 MHz, DMSO-d<sub>6</sub>).

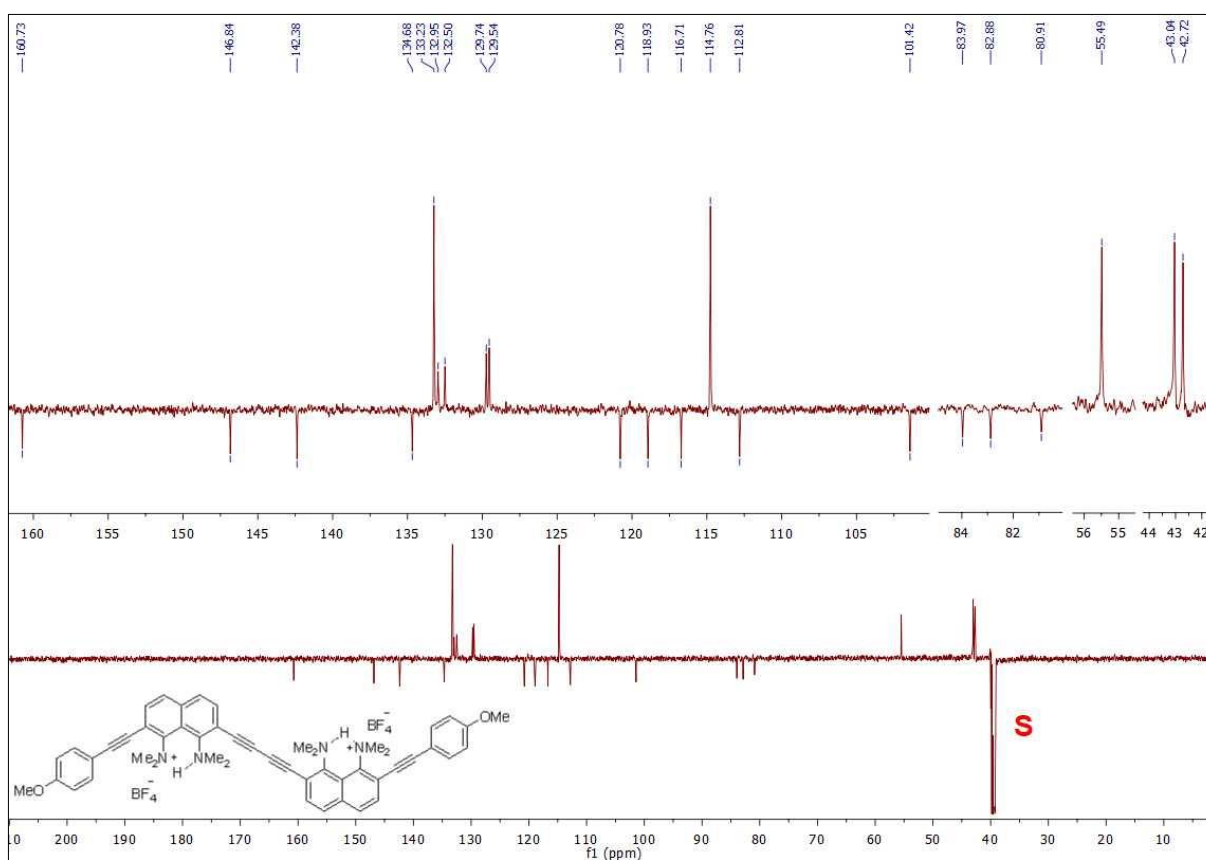

**Figure S52.** <sup>13</sup>C{<sup>1</sup>H} APT-NMR spectrum of compound **11b** (150 MHz, DMSO-d<sub>6</sub>).



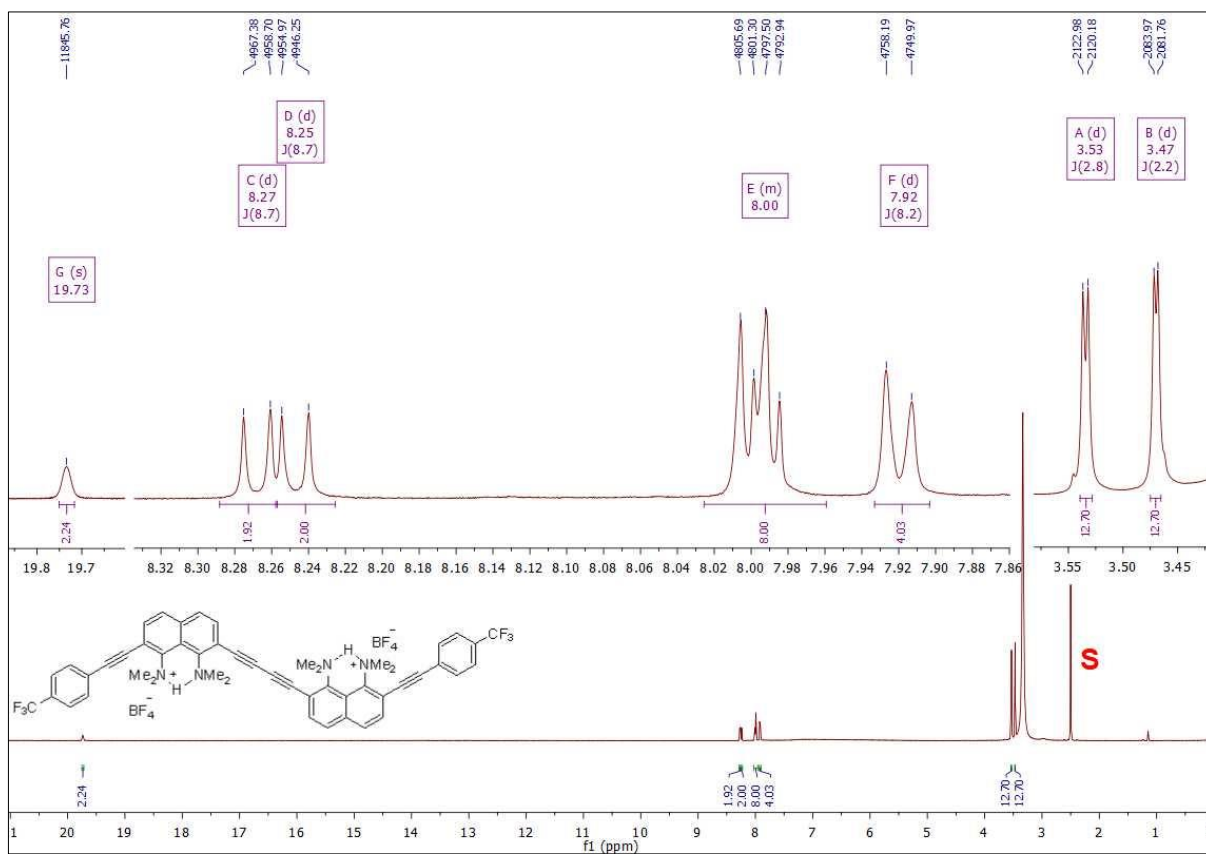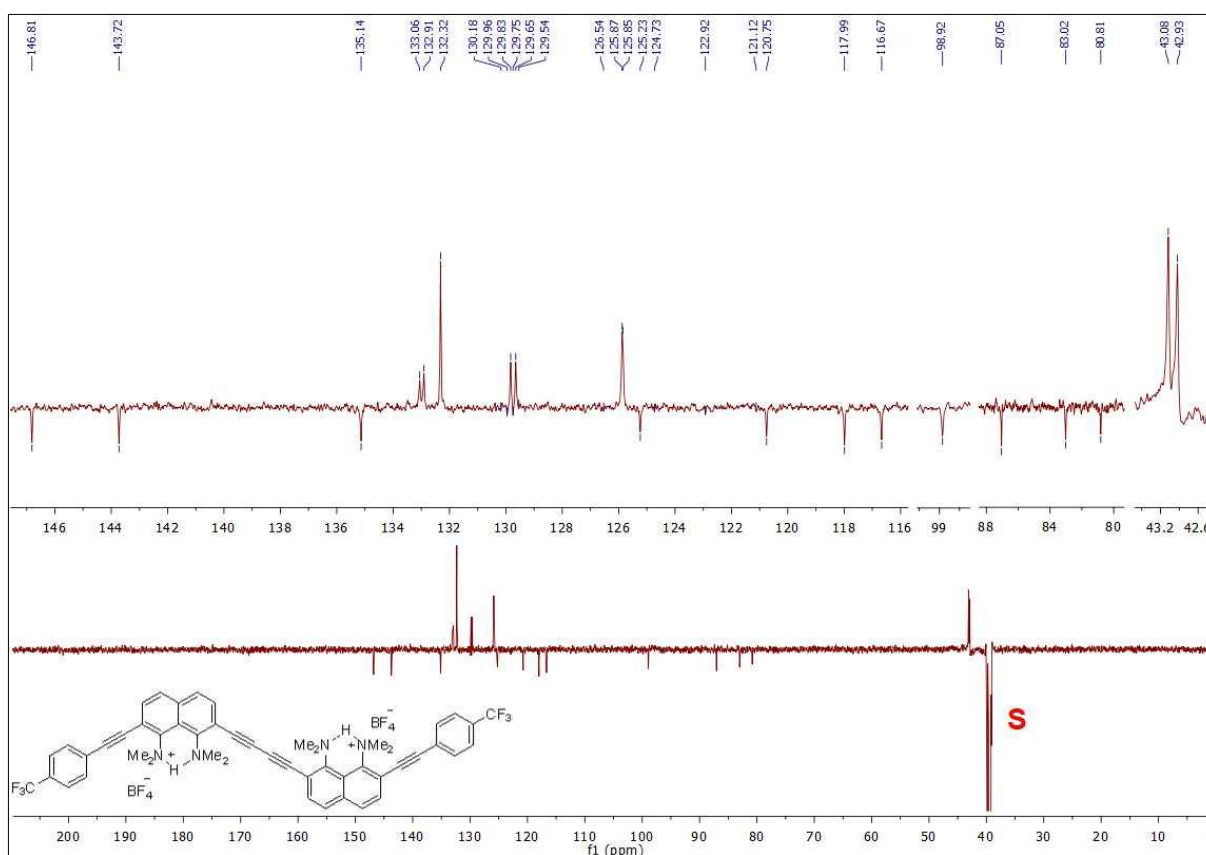

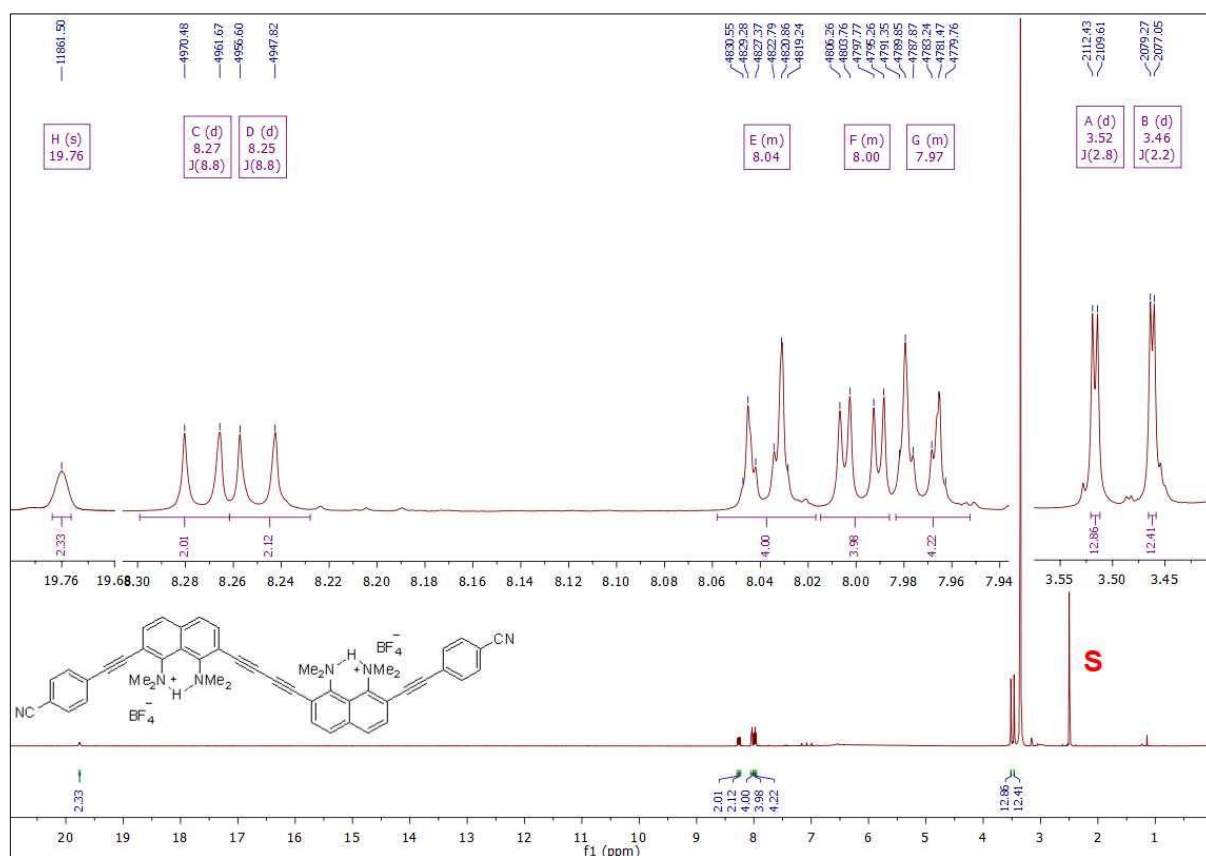

**Figure S55.** <sup>1</sup>H NMR spectrum of compound **11d** (600 MHz, DMSO-d<sub>6</sub>).

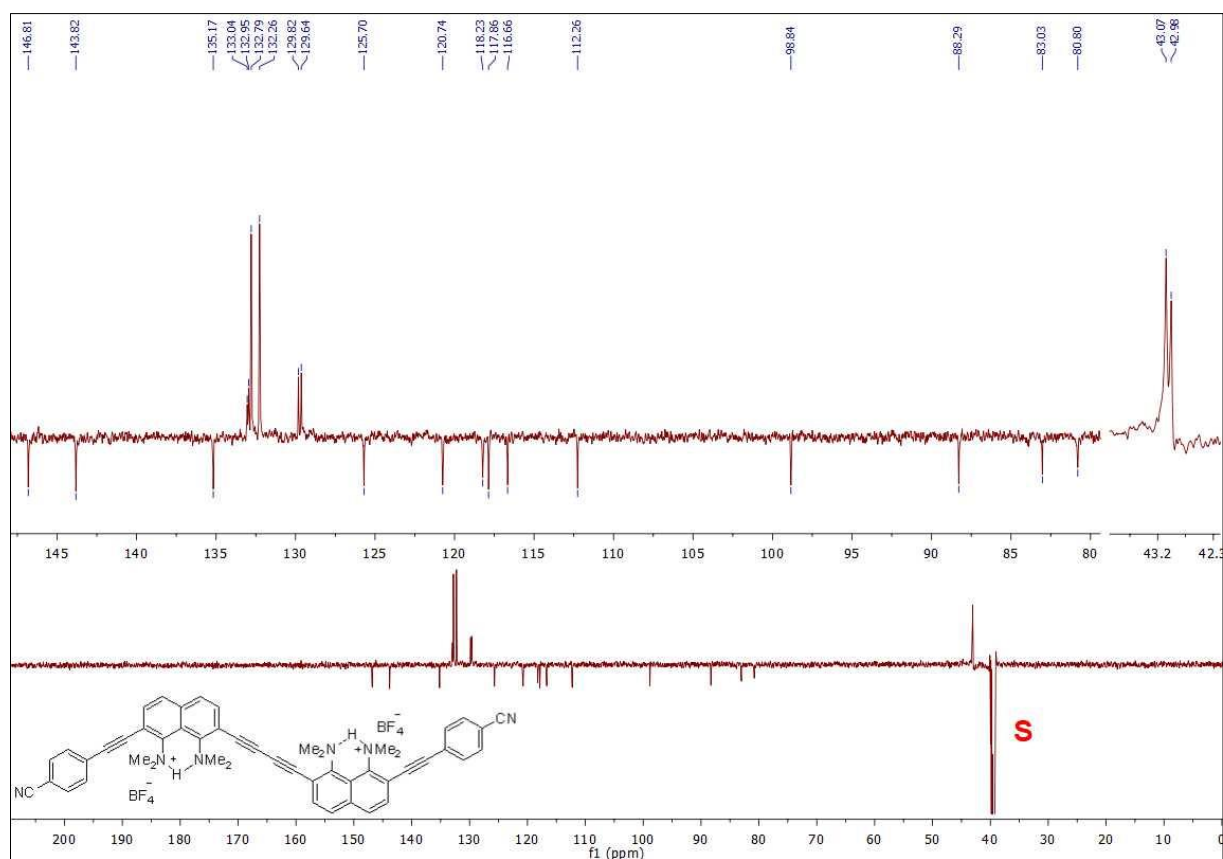

**Figure S56.** <sup>13</sup>C{<sup>1</sup>H} APT-NMR spectrum of compound **11d** (150 MHz, DMSO-d<sub>6</sub>).

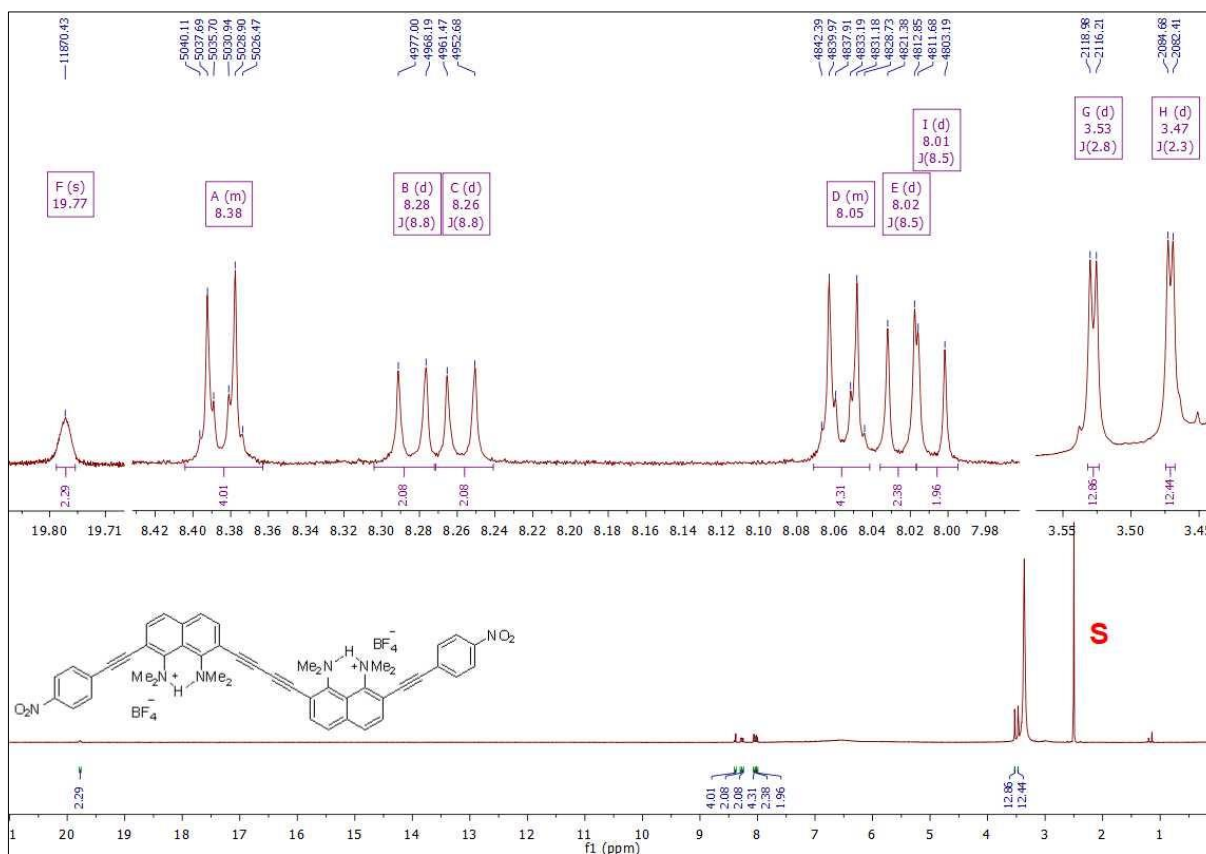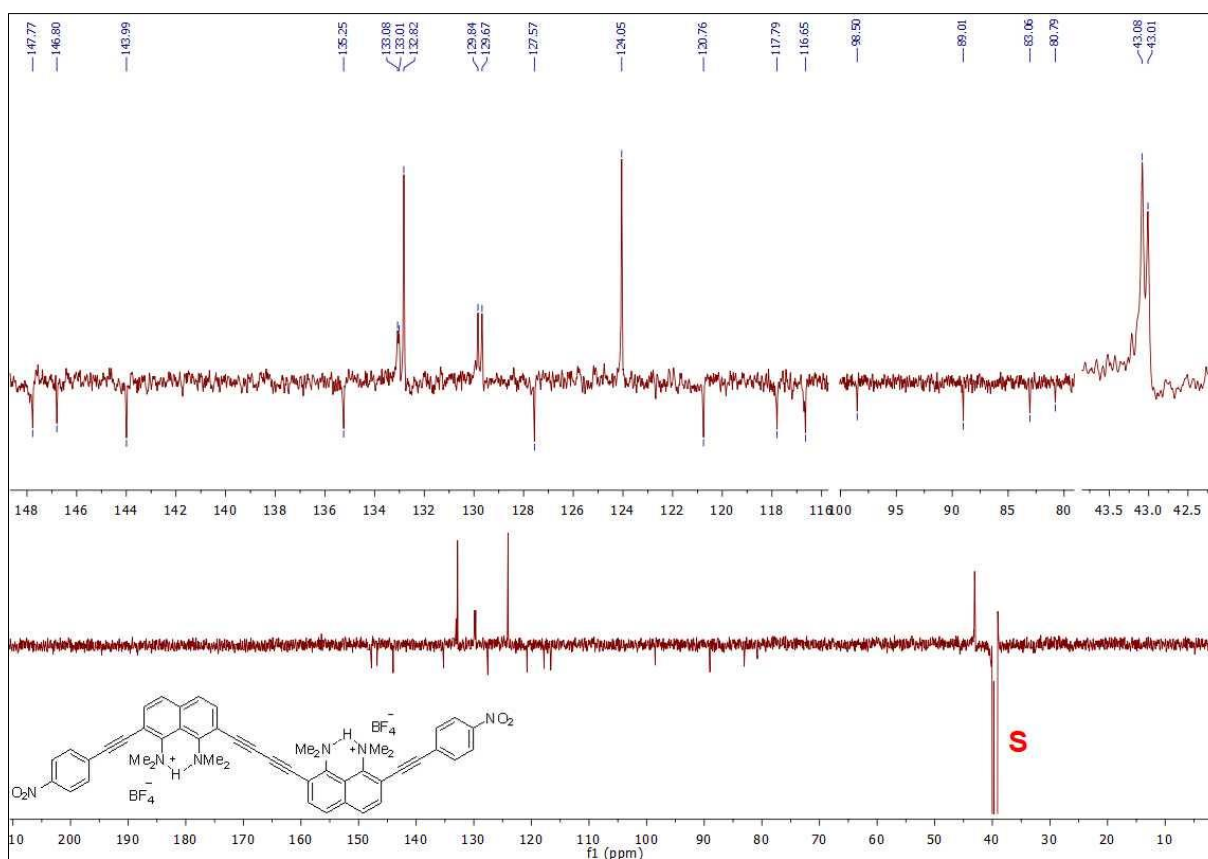



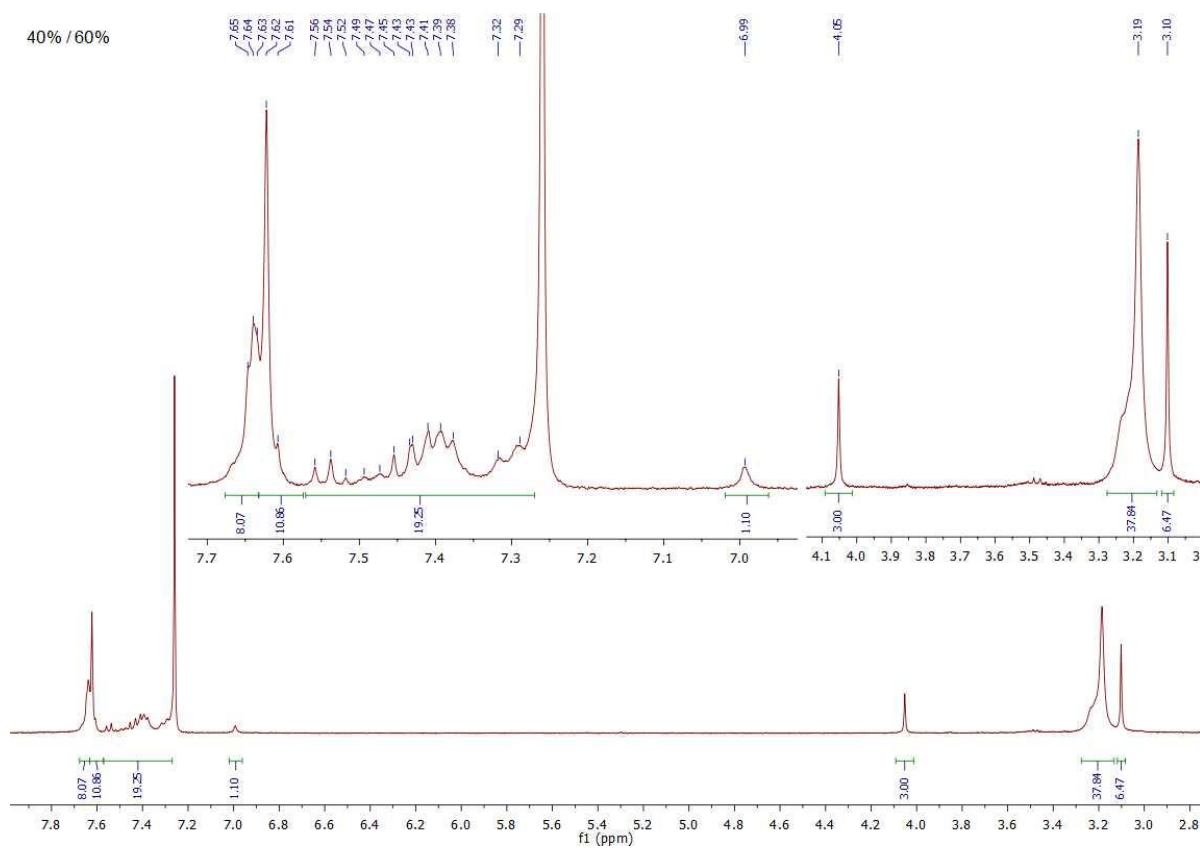

**Figure S59.**  $^1\text{H}$  NMR spectrum of a mixture of compounds **5c** and **12** formed after keeping a solution of **5c** in chloroform/ethanol 1:1 for a month (250 MHz,  $\text{CDCl}_3$ ).

## X-ray data

**Crystal structure determination:** X-Ray measurements were conducted with four-circle SuperNova and XtaLAB Synergy diffractometers, single source at offset/far, AtlasS2 and HyPix3000 detectors ( $\text{CuK}\alpha$  radiation). Atomic coordinates, bond lengths, bond angles and thermal parameters have been deposited at the Cambridge Crystallographic Data Centre (CCDC) and allocated the deposition numbers CCDC 2215907 (**5b**), CCDC 2215905 (**5d**), CCDC 2215904 (**5e**), CCDC 2215908 (**9e**), CCDC 2215909 (**11c**) and CCDC 2215906 (**12**). These data can be obtained free of charge from the Cambridge Crystallographic Data Centre via [www.ccdc.cam.ac.uk/data\\_request/cif](http://www.ccdc.cam.ac.uk/data_request/cif).

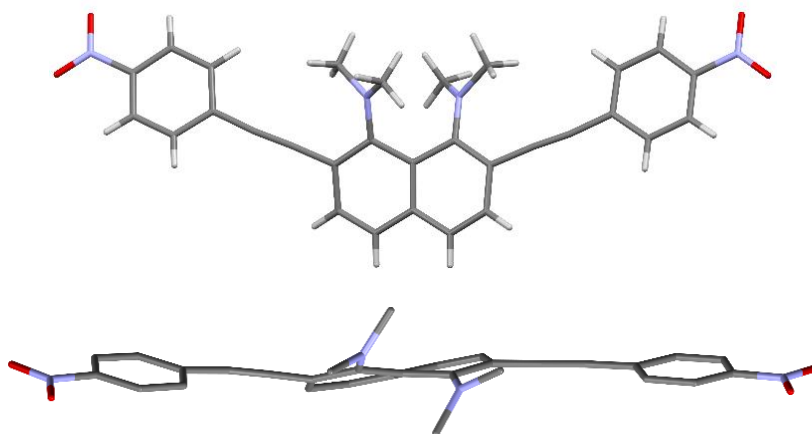

**Figure S60.** Molecular structure of compound **9e**: frontal (top) and side views (bottom, hydrogen atoms omitted).

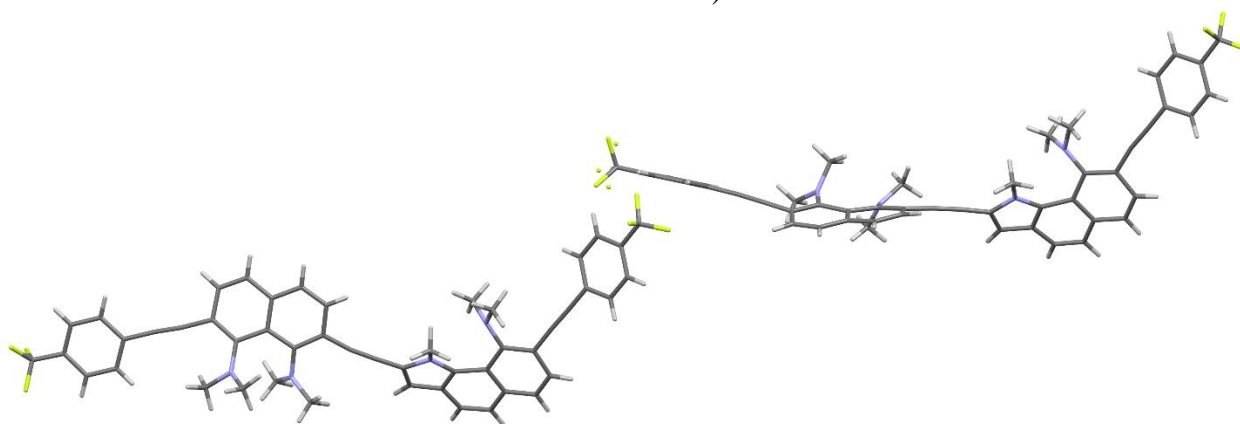

**Figure S61.** Molecular structure of compound **12** (two independent molecules in the unit cell).

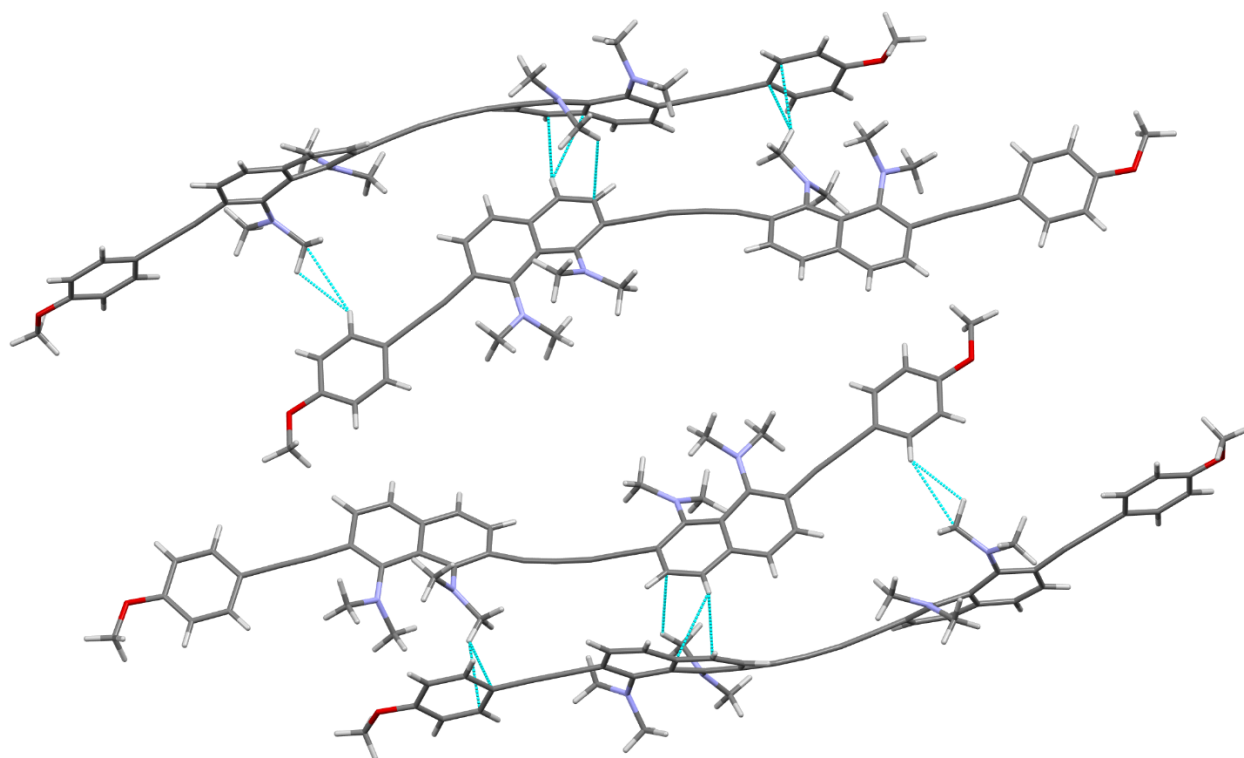

**Figure S62.** Short contacts in the unit cell of **5b**.

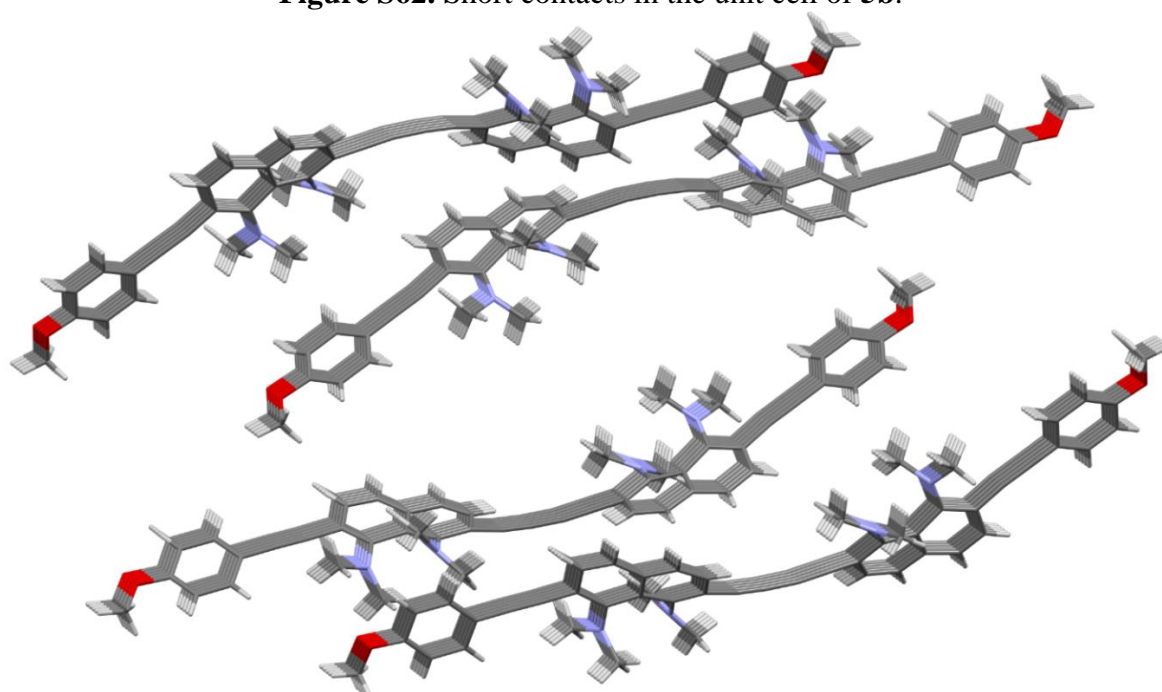

**Figure S63.** Crystal packing of **5b** (view along *b* axis).

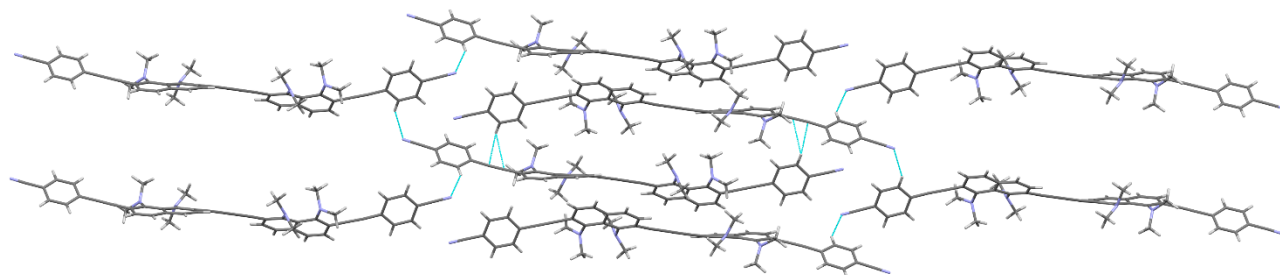

**Figure S64.** Crystal packing of **5d** (short contacts).

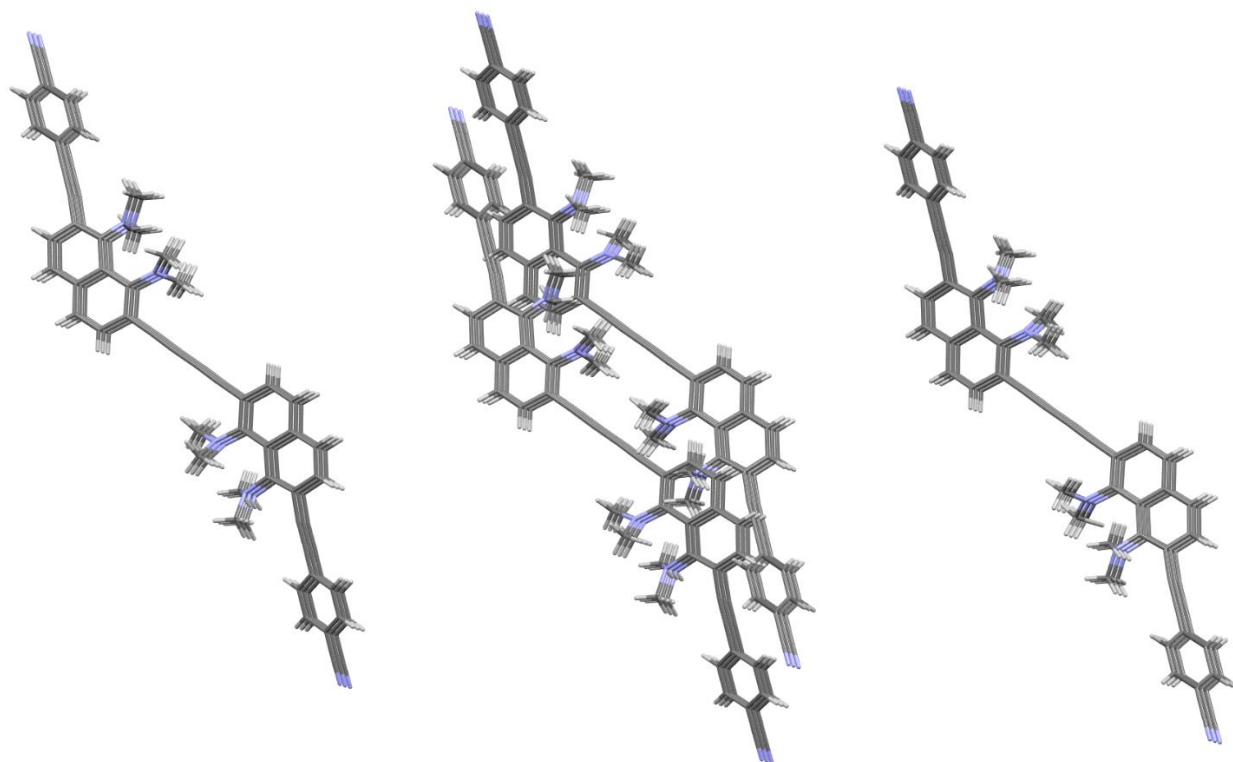

**Figure S65.** Crystal packing of **5d** (view along *b* axis).

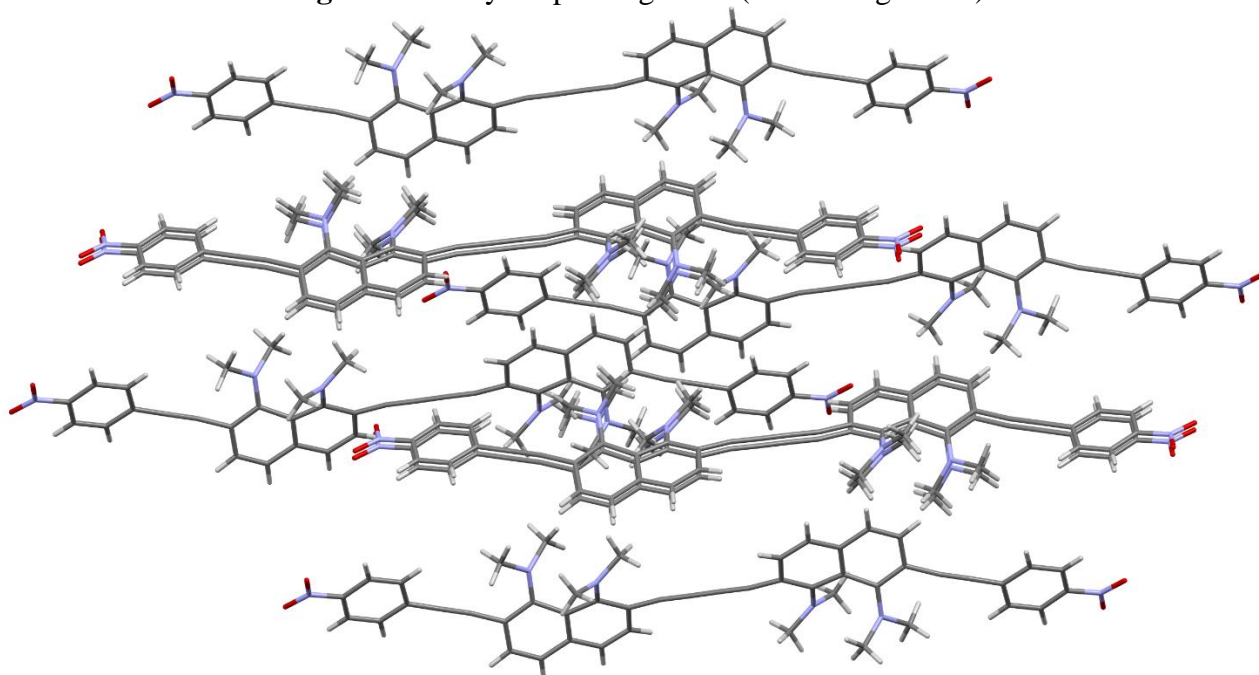

**Figure S66.** Crystal packing of **5e** (view along *b* axis).

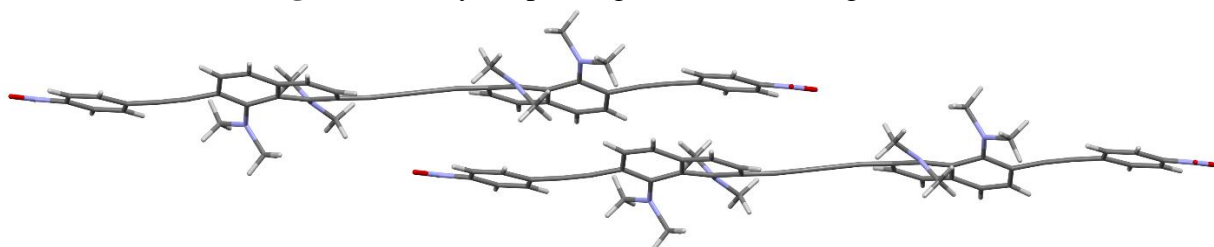

**Figure S67.** Molecules **5e** tend to approach  $\pi$ -donor DMAN and  $\pi$ -acceptor *p*-nitrophenyl fragments with the shortest distance between the two molecules equal to 2.810 Å.



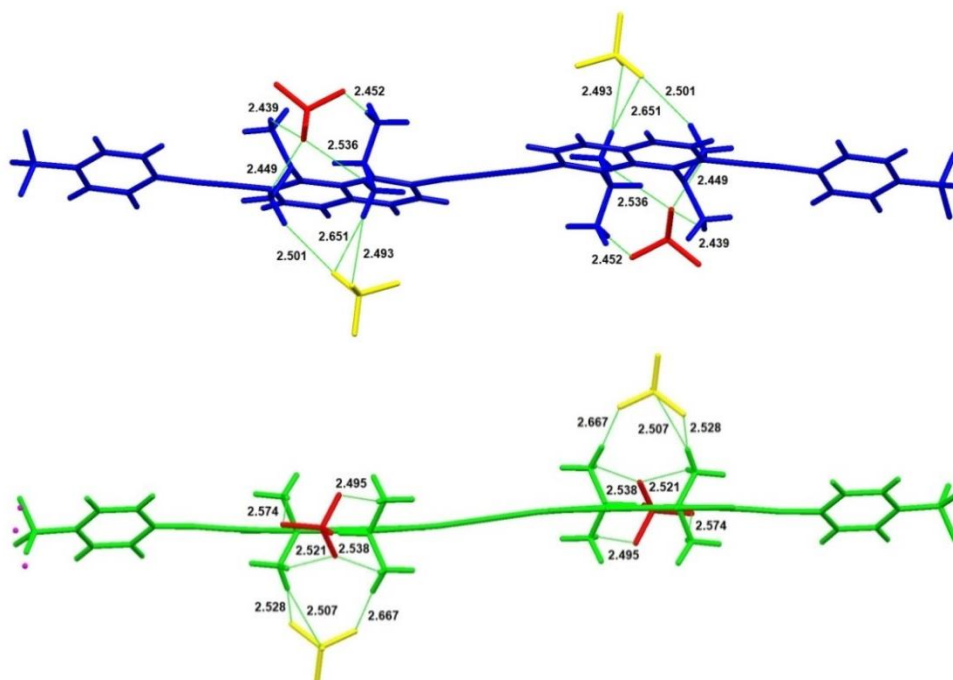

**Figure S68.** Two types of independent non-equivalent dications, marked in blue and green, and two types of  $\text{BF}_4^-$  anions, marked in red and yellow, in the crystal structure of salt **11c**.

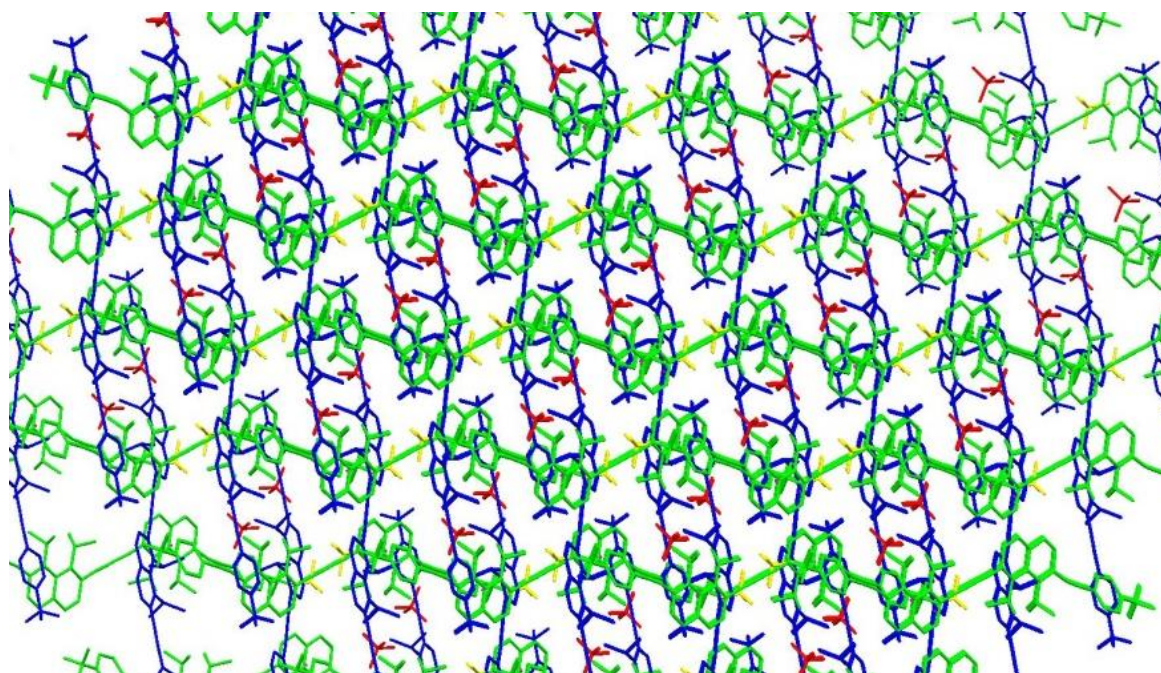

**Figure S69.** Crystal packing of salt **11c** with perpendicular layers of cations of two types.

## References

- [1] A. F. Pozharskii, O. V. Ryabtsova, V. A. Ozeryanskii, A. V. Degtyarev, O. N. Kazheva, G. G. Alexandrov, O. A. Dyachenko, *J. Org. Chem.* **2003**, *68*, 10109–10122.
- [2] W. Chen, B. Wang, N. Liu, D. Huang, X. Wang, Y. Hu, *Org. Lett.* **2014**, *16*, 6140–6143.
- [3] E. A. Filatova, A. F. Pozharskii, A. V. Gulevskaya, N. V. Vistorobskii, V. A. Ozeryanskii, *Synlett*, **2013**, *24*, 2515–2518.
